# Supplementary material for: AI-SPedia: a novel ontology to evaluate the impact of research in the field of artificial intelligence
Source: PeerJ Comput Sci. 2022 Sep 22;8:e1099. doi: 10.7717/peerj-cs.1099 (PMC10280256; doi:10.7717/peerj-cs.1099)
Supplement: Supplemental Information 1 — Publications in artificial intelligence field: the DOI, authors names, journals, bibliometric and altmetric parameters. [file peerj-cs-08-1099-s001.xlsx]

## Sheet: ورقة1
doi	title	journal	citations	altmetric_score	total_count	IF		twitter	patent	news
10.1145/1961189.1961199	LIBSVM: A Library for Support Vector Machines	ACM TRANSACTIONS ON INTELLIGENT SYSTEMS AND TECHNOLOGY	15721	29.644	51	2.861		3	42	0
10.1016/j.cviu.2007.09.014	Speeded-Up Robust Features (SURF)	COMPUTER VISION AND IMAGE UNDERSTANDING	6282	21	167	2.645		0	166	0
10.1007/s11263-015-0816-y	ImageNet Large Scale Visual Recognition Challenge	INTERNATIONAL JOURNAL OF COMPUTER VISION	5041	28.85	38	6.071		34	1	1
10.1137/080716542	A Fast Iterative Shrinkage-Thresholding Algorithm for Linear Inverse Problems	SIAM JOURNAL ON IMAGING SCIENCES	4142	15	35	2.514		0	35	0
10.1016/j.neunet.2014.09.003	Deep learning in neural networks: An overview	NEURAL NETWORKS	3353	481	634	5.785		486	6	6
10.1007/s11263-009-0275-4	The Pascal Visual Object Classes (VOC) Challenge	INTERNATIONAL JOURNAL OF COMPUTER VISION	3231	9	19	6.071		0	17	0
10.1016/j.patrec.2009.09.011	Data clustering: 50 years beyond K-means	PATTERN RECOGNITION LETTERS	2991	21.758	15	2.81		5	5	0
10.1137/080725891	The Split Bregman Method for L1-Regularized Problems	SIAM JOURNAL ON IMAGING SCIENCES	2271	3	14	2.514		0	14	0
10.1007/s10115-007-0114-2	Top 10 algorithms in data mining	KNOWLEDGE AND INFORMATION SYSTEMS	1880	29.15	22	2.397		14	4	1
10.1007/s11263-013-0620-5	Selective Search for Object Recognition	INTERNATIONAL JOURNAL OF COMPUTER VISION	1612	1.25	2	6.071		1	0	0
10.4018/jswis.2009081901	Linked Data - The Story So Far	INTERNATIONAL JOURNAL ON SEMANTIC WEB AND INFORMATION SYSTEMS	1539	28.894	18	1.833		9	3	0
10.1016/j.swevo.2011.02.002	A practical tutorial on the use of nonparametric statistical tests as a methodology for comparing evolutionary and swarm intelligence algorithms	SWARM AND EVOLUTIONARY COMPUTATION	1523	11.1	11	6.33		10	1	0
10.1137/080724265	A New Alternating Minimization Algorithm for Total Variation Image Reconstruction	SIAM JOURNAL ON IMAGING SCIENCES	1032	6	14	2.514		0	14	0
10.1016/j.imavis.2009.11.014	A survey on vision-based human action recognition	IMAGE AND VISION COMPUTING	1025	6	3	2.733		0	3	0
10.1007/s11263-007-0090-8	LabelMe: A database and web-based tool for image annotation	INTERNATIONAL JOURNAL OF COMPUTER VISION	1001	3	15	6.071		0	15	0
10.1016/j.knosys.2013.03.012	Recommender systems survey	KNOWLEDGE-BASED SYSTEMS	979	14.258	8	5.101		0	5	0
10.1007/s11263-007-0107-3	Modeling the world from Internet photo collections	INTERNATIONAL JOURNAL OF COMPUTER VISION	920	9.25	50	6.071		0	49	0
10.1016/j.imavis.2008.08.005	Facial expression recognition based on Local Binary Patterns: A comprehensive study	IMAGE AND VISION COMPUTING	919	3	6	2.733		0	6	0
10.1016/j.neunet.2008.03.014	Central pattern generators for locomotion control in animals and robots: A review	NEURAL NETWORKS	847	16	44	5.785		1	42	1
10.1137/070703983	Bregman Iterative Algorithms for l(1)-Minimization with Applications to Compressed Sensing	SIAM JOURNAL ON IMAGING SCIENCES	825	3	5	2.514		0	5	0
10.1007/s10462-009-9124-7	Ensemble-based classifiers	ARTIFICIAL INTELLIGENCE REVIEW	824	7	5	5.095		1	2	0
10.1016/j.dss.2010.12.006	Cloud computing - The business perspective	DECISION SUPPORT SYSTEMS	769	23.86	18	3.847		11	0	0
10.1007/s11263-014-0733-5	The PASCAL Visual Object Classes Challenge: A Retrospective	INTERNATIONAL JOURNAL OF COMPUTER VISION	764	3	1	6.071		0	1	0
10.1007/s11263-007-0122-4	Unsupervised learning of human action categories using spatial-temporal words	INTERNATIONAL JOURNAL OF COMPUTER VISION	762	9	13	6.071		0	13	0
10.1007/s11263-010-0390-2	A Database and Evaluation Methodology for Optical Flow	INTERNATIONAL JOURNAL OF COMPUTER VISION	760	9	34	6.071		0	33	0
10.1016/j.imavis.2009.08.002	Multi-PIE	IMAGE AND VISION COMPUTING	749	3	2	2.733		0	1	0
10.1016/j.websem.2009.07.002	DBpedia - A crystallization point for the Web of Data	JOURNAL OF WEB SEMANTICS	737	15.064	4	2.429		1	1	0
10.1016/j.inffus.2011.08.001	Multisensor data fusion: A review of the state-of-the-art	INFORMATION FUSION	713	9.55	10	10.716		9	0	0
10.1016/j.media.2009.05.004	Statistical shape models for 3D medical image segmentation: A review	MEDICAL IMAGE ANALYSIS	683	9	16	8.88		0	16	0
10.1007/s11263-013-0636-x	Image Classification with the Fisher Vector: Theory and Practice	INTERNATIONAL JOURNAL OF COMPUTER VISION	678	8.85	7	6.071		4	3	0
10.1016/j.patcog.2008.08.014	Description of interest regions with local binary patterns	PATTERN RECOGNITION	659	6	2	5.898		0	1	0
10.1016/j.neunet.2014.10.001	Trends in extreme learning machines: A review	NEURAL NETWORKS	632	7.55	6	5.785		5	1	0
10.1016/j.dss.2008.04.001	Do online reviews matter? - An empirical investigation of panel data	DECISION SUPPORT SYSTEMS	631	16.32	6	3.847		3	0	0
10.1016/j.patrec.2010.03.014	Variable selection using random forests	PATTERN RECOGNITION LETTERS	631	2.5	1	2.81		0	0	0
10.1016/j.patcog.2010.09.020	Survey on speech emotion recognition: Features classification schemes and databases	PATTERN RECOGNITION	611	7.5	13	5.898		2	11	0
10.1137/090769521	Total Generalized Variation	SIAM JOURNAL ON IMAGING SCIENCES	607	14.08	6	2.514		0	4	0
10.1007/s10994-007-5040-8	Convex multi-task feature learning	MACHINE LEARNING	582	9	6	2.809		0	4	0
10.1007/s10994-011-5256-5	Classifier chains for multi-label classification	MACHINE LEARNING	575	3	1	2.809		0	1	0
10.1137/090756855	NESTA: A Fast and Accurate First-Order Method for Sparse Recovery	SIAM JOURNAL ON IMAGING SCIENCES	553	3	3	2.514		0	3	0
10.1016/j.neunet.2010.05.001	Experimental demonstration of associative memory with memristive neural networks	NEURAL NETWORKS	524	3.25	6	5.785		0	5	0
10.1016/j.media.2009.07.011	A review of 3D vessel lumen segmentation techniques: Models features and extraction schemes	MEDICAL IMAGE ANALYSIS	523	9	41	8.88		0	41	0
10.1016/j.eswa.2008.01.039	A simple and fast algorithm for K-medoids clustering	EXPERT SYSTEMS WITH APPLICATIONS	504	16.508	6	4.292		1	2	0
10.1016/j.media.2016.10.004	Efficient multi-scale 3D CNN with fully connected CRF for accurate brain lesion segmentation	MEDICAL IMAGE ANALYSIS	501	30.9	64	8.88		63	0	0
10.1007/s00521-015-1870-7	Multi-Verse Optimizer: a nature-inspired algorithm for global optimization	NEURAL COMPUTING & APPLICATIONS	500	0.5	1	4.664		1	0	0
10.1016/j.websem.2012.05.003	The SSN ontology of the W3C semantic sensor network incubator group	JOURNAL OF WEB SEMANTICS	497	15	13	2.429		7	3	0
10.1016/j.cviu.2010.10.002	A survey of vision-based methods for action representation segmentation and recognition	COMPUTER VISION AND IMAGE UNDERSTANDING	492	3	1	2.645		0	1	0
10.1016/j.patcog.2009.08.017	Rotation invariant texture classification using LBP variance (LBPV) with global matching	PATTERN RECOGNITION	474	3	2	5.898		0	2	0
10.1145/1516533.1516538	Self-Adaptive Software: Landscape and Research Challenges	ACM TRANSACTIONS ON AUTONOMOUS AND ADAPTIVE SYSTEMS	471	3	3	2.66		0	3	0
10.1016/j.patcog.2014.01.005	Automatic generation and detection of highly reliable fiducial markers under occlusion	PATTERN RECOGNITION	469	13	7	5.898		2	5	0
10.1016/j.knosys.2015.07.006	Moth-flame optimization algorithm: A novel nature-inspired heuristic paradigm	KNOWLEDGE-BASED SYSTEMS	459	8.616	1	5.101		0	0	0
10.1007/s11263-007-0109-1	TextonBoost for Image Understanding: Multi-Class Object Recognition and Segmentation by Jointly Modeling Texture Layout and Context	INTERNATIONAL JOURNAL OF COMPUTER VISION	451	3	12	6.071		0	12	0
10.1016/j.media.2009.05.003	Fractal and multifractal analysis: A review	MEDICAL IMAGE ANALYSIS	446	9.5	4	8.88		1	2	0
10.1007/s10994-009-5108-8	Cutting-plane training of structural SVMs	MACHINE LEARNING	439	3	4	2.809		0	4	0
10.1007/s12559-014-9255-2	An Insight into Extreme Learning Machines: Random Neurons Random Features and Kernels	COGNITIVE COMPUTATION	438	3	1	4.287		0	0	0
10.1007/s11721-012-0075-2	Swarm robotics: a review from the swarm engineering perspective	SWARM INTELLIGENCE	437	4.35	4	2.208		2	2	0
10.1016/j.eswa.2007.08.088	Particle swarm optimization for parameter determination and feature selection of support vector machines	EXPERT SYSTEMS WITH APPLICATIONS	430	1	1	4.292		1	0	0
10.1016/j.patcog.2007.05.018	A survey of kernel and spectral methods for clustering	PATTERN RECOGNITION	429	3	4	5.898		0	4	0
10.1007/s11263-007-0052-1	Nonlocal image and movie denoising	INTERNATIONAL JOURNAL OF COMPUTER VISION	425	3	2	6.071		0	2	0
10.1145/2508037.2508039	A Survey of Appearance Models in Visual Object Tracking	ACM TRANSACTIONS ON INTELLIGENT SYSTEMS AND TECHNOLOGY	422	3.25	2	2.861		0	1	0
10.1016/j.swevo.2013.06.001	A comprehensive review of firefly algorithms	SWARM AND EVOLUTIONARY COMPUTATION	421	1	1	6.33		1	0	0
10.1016/j.asoc.2011.05.008	Cuckoo Optimization Algorithm	APPLIED SOFT COMPUTING	419	1	1	4.873		1	0	0
10.1145/2743025	Trajectory Data Mining: An Overview	ACM TRANSACTIONS ON INTELLIGENT SYSTEMS AND TECHNOLOGY	418	9.5	11	2.861		1	0	0
10.1002/widm.8	Classification and regression trees	WILEY INTERDISCIPLINARY REVIEWS-DATA MINING AND KNOWLEDGE DISCOVERY	412	6	2	2.541		0	2	0
10.1016/j.eswa.2011.04.143	Review of the main developments in the analytic hierarchy process	EXPERT SYSTEMS WITH APPLICATIONS	410	1	1	4.292		0	0	0
10.1016/j.dss.2012.05.053	A review of modeling approaches for sustainable supply chain management	DECISION SUPPORT SYSTEMS	407	1	1	3.847		1	0	0
10.1016/j.inffus.2013.04.006	A survey of multiple classifier systems as hybrid systems	INFORMATION FUSION	398	11.05	9	10.716		6	2	0
10.1016/j.patcog.2009.10.010	Active contours driven by local image fitting energy	PATTERN RECOGNITION	397	3	1	5.898		0	1	0
10.1016/j.patcog.2010.03.004	A state of the art in structured light patterns for surface profilometry	PATTERN RECOGNITION	382	12	17	5.898		0	17	0
10.1016/j.eswa.2010.06.065	EEG signal classification using PCA ICA LDA and support vector machines	EXPERT SYSTEMS WITH APPLICATIONS	382	3	2	4.292		0	2	0
10.1016/j.eswa.2011.08.162	A novel hybrid MCDM approach based on fuzzy DEMATEL fuzzy ANP and fuzzy TOPSIS to evaluate green suppliers	EXPERT SYSTEMS WITH APPLICATIONS	379	0.5	1	4.292		1	0	0
10.1016/j.swevo.2011.10.001	Constraint-handling in nature-inspired numerical optimization: Past present and future	SWARM AND EVOLUTIONARY COMPUTATION	374	0.5	1	6.33		1	0	0
10.1007/s11263-009-0285-2	Improving Bag-of-Features for Large Scale Image Search	INTERNATIONAL JOURNAL OF COMPUTER VISION	370	3	1	6.071		0	1	0
10.1016/j.neucom.2011.07.024	Recent advances and trends in visual tracking: A review	NEUROCOMPUTING	364	9	6	4.072		0	6	0
10.1016/j.media.2010.12.004	A review of segmentation methods in short axis cardiac MR images	MEDICAL IMAGE ANALYSIS	354	6	3	8.88		0	3	0
10.1007/s10994-009-5119-5	Measuring classifier performance: a coherent alternative to the area under the ROC curve	MACHINE LEARNING	353	25.48	27	2.809		24	0	0
10.1007/s11263-008-0202-0	Robust Higher Order Potentials for Enforcing Label Consistency	INTERNATIONAL JOURNAL OF COMPUTER VISION	353	6	6	6.071		0	6	0
10.1145/2168752.2168771	Factorization Machines with libFM	ACM TRANSACTIONS ON INTELLIGENT SYSTEMS AND TECHNOLOGY	348	5	4	2.861		3	0	0
10.1016/j.eswa.2007.10.005	Neural networks and statistical techniques: A review of applications	EXPERT SYSTEMS WITH APPLICATIONS	348	0.25	1	4.292		0	0	0
10.1016/j.websem.2008.05.001	OWL 2: The next step for OWL	JOURNAL OF WEB SEMANTICS	347	16.956	6	2.429		1	0	0
10.1016/j.neucom.2015.09.116	Deep learning for visual understanding: A review	NEUROCOMPUTING	347	8.8	8	4.072		7	1	0
10.1016/j.dss.2012.06.008	The impact of electronic word-of-mouth communication: A literature analysis and integrative model	DECISION SUPPORT SYSTEMS	343	4.35	5	3.847		4	0	0
10.1016/j.patcog.2009.09.023	Two-stage image denoising by principal component analysis with local pixel grouping	PATTERN RECOGNITION	342	6	3	5.898		0	2	0
10.1016/j.eswa.2015.01.003	Fuzzy multiple criteria decision-making techniques and applications - Two decades review from 1994 to 2014	EXPERT SYSTEMS WITH APPLICATIONS	342	3	1	4.292		0	0	0
10.1016/j.asoc.2011.01.037	A novel particle swarm optimization algorithm with adaptive inertia weight	APPLIED SOFT COMPUTING	339	1	1	4.873		1	0	0
10.1016/j.neunet.2012.02.023	Multi-column deep neural network for traffic sign classification	NEURAL NETWORKS	337	6	3	5.785		0	1	0
10.1016/j.neucom.2011.09.037	A survey on fall detection: Principles and approaches	NEUROCOMPUTING	328	0.25	1	4.072		0	0	0
10.1007/s11263-009-0273-6	HumanEva: Synchronized Video and Motion Capture Dataset and Baseline Algorithm for Evaluation of Articulated Human Motion	INTERNATIONAL JOURNAL OF COMPUTER VISION	325	3	2	6.071		0	1	0
10.1016/j.media.2010.03.005	A review of 3D/2D registration methods for image-guided interventions	MEDICAL IMAGE ANALYSIS	321	12	11	8.88		0	11	0
10.1016/j.dss.2009.05.016	Modeling wine preferences by data mining from physicochemical properties	DECISION SUPPORT SYSTEMS	320	5	3	3.847		1	1	0
10.1016/j.artmed.2012.09.003	Smart wearable systems: Current status and future challenges	ARTIFICIAL INTELLIGENCE IN MEDICINE	320	4	4	3.574		1	3	0
10.1007/s11263-008-0197-6	Fields of Experts	INTERNATIONAL JOURNAL OF COMPUTER VISION	320	3	4	6.071		0	4	0
10.1016/j.artint.2012.06.001	YAGO2: A spatially and temporally enhanced knowledge base from Wikipedia	ARTIFICIAL INTELLIGENCE	318	13.1	15	4.483		13	2	0
10.1007/s10994-008-5064-8	Multilabel classification via calibrated label ranking	MACHINE LEARNING	318	3	1	2.809		0	1	0
10.1016/j.cviu.2013.12.005	A comprehensive review of background subtraction algorithms evaluated with synthetic and real videos	COMPUTER VISION AND IMAGE UNDERSTANDING	318	0.25	1	2.645		0	0	0
10.1016/j.asoc.2011.02.032	Hybrid metaheuristics in combinatorial optimization: A survey	APPLIED SOFT COMPUTING	314	1.85	2	4.873		2	0	0
10.1016/j.cviu.2008.08.006	Object tracking using SIFT features and mean shift	COMPUTER VISION AND IMAGE UNDERSTANDING	312	6	10	2.645		0	10	0
10.1016/j.eswa.2012.07.021	A comparative study of efficient initialization methods for the k-means clustering algorithm	EXPERT SYSTEMS WITH APPLICATIONS	311	12.83	7	4.292		4	0	0
10.1016/j.dss.2015.03.008	Recommender system application developments: A survey	DECISION SUPPORT SYSTEMS	302	0.5	1	3.847		1	0	0
10.1111/j.1467-8640.2012.00460.x	CROWDSOURCING A WORD-EMOTION ASSOCIATION LEXICON	COMPUTATIONAL INTELLIGENCE	298	3	1	0.776		0	0	0
10.1016/j.neucom.2015.08.096	From action to activity: Sensor-based activity recognition	NEUROCOMPUTING	298	0.5	1	4.072		1	0	0
10.1007/s11263-007-0110-8	A Fast Approximation of the Bilateral Filter Using a Signal Processing Approach	INTERNATIONAL JOURNAL OF COMPUTER VISION	296	9	7	6.071		0	7	0
10.1007/s11263-013-0667-3	Face Alignment by Explicit Shape Regression	INTERNATIONAL JOURNAL OF COMPUTER VISION	296	6	2	6.071		0	2	0
10.1016/j.eswa.2013.07.107	Survey of Green Vehicle Routing Problem: Past and future trends	EXPERT SYSTEMS WITH APPLICATIONS	294	0.5	1	4.292		1	0	0
10.1016/j.neucom.2012.08.010	Weighted extreme learning machine for imbalance learning	NEUROCOMPUTING	294	0.5	1	4.072		1	0	0
10.1007/s00521-013-1362-6	A survey of multi-view machine learning	NEURAL COMPUTING & APPLICATIONS	292	5	4	4.664		3	1	0
10.1016/j.media.2008.02.004	MRI denoising using Non-Local Means	MEDICAL IMAGE ANALYSIS	289	3	1	8.88		0	1	0
10.1007/s10844-010-0148-x	Andromaly: a behavioral malware detection framework for android devices	JOURNAL OF INTELLIGENT INFORMATION SYSTEMS	285	12	35	1.589		0	33	0
10.1016/j.knosys.2015.06.015	A survey on opinion mining and sentiment analysis: Tasks approaches and applications	KNOWLEDGE-BASED SYSTEMS	285	1.85	2	5.101		2	0	0
10.1007/s11263-015-0823-z	Reading Text in the Wild with Convolutional Neural Networks	INTERNATIONAL JOURNAL OF COMPUTER VISION	284	6	3	6.071		0	3	0
10.1016/j.patcog.2008.08.011	Exploring feature-based approaches in PET images for predicting cancer treatment outcomes	PATTERN RECOGNITION	284	5.5	2	5.898		0	1	0
10.1016/j.imavis.2008.04.004	Approximate graph edit distance computation by means of bipartite graph matching	IMAGE AND VISION COMPUTING	282	3	1	2.733		0	1	0
10.1007/s10115-013-0693-z	Defining and evaluating network communities based on ground-truth	KNOWLEDGE AND INFORMATION SYSTEMS	281	0.5	1	2.397		1	0	0
10.1016/j.patcog.2009.05.012	Automated breast cancer detection and classification using ultrasound images: A survey	PATTERN RECOGNITION	279	6	5	5.898		0	5	0
10.1016/j.neunet.2008.02.003	Reinforcement learning of motor skills with policy gradients	NEURAL NETWORKS	278	5	1	5.785		0	0	0
10.1016/j.asoc.2009.06.019	The use of computational intelligence in intrusion detection systems: A review	APPLIED SOFT COMPUTING	277	9.25	4	4.873		0	3	0
10.1016/j.inffus.2010.03.002	Performance comparison of different multi-resolution transforms for image fusion	INFORMATION FUSION	277	3	1	10.716		0	1	0
10.1016/j.patrec.2014.01.008	A review of unsupervised feature learning and deep learning for time-series modeling	PATTERN RECOGNITION LETTERS	275	3	1	2.81		0	1	0
10.1016/j.artint.2009.11.011	Hidden semi-Markov models	ARTIFICIAL INTELLIGENCE	274	3	1	4.483		0	1	0
10.1016/j.eswa.2009.05.029	Intrusion detection by machine learning: A review	EXPERT SYSTEMS WITH APPLICATIONS	274	0.25	1	4.292		0	0	0
10.1016/j.cviu.2007.07.005	Unsupervised segmentation of natural images via lossy data compression	COMPUTER VISION AND IMAGE UNDERSTANDING	273	3	1	2.645		0	1	0
10.1007/s10618-012-0250-5	Experimental comparison of representation methods and distance measures for time series data	DATA MINING AND KNOWLEDGE DISCOVERY	271	4.25	5	2.879		1	0	0
10.1016/j.eswa.2012.02.063	Data mining techniques and applications - A decade review from 2000 to 2011	EXPERT SYSTEMS WITH APPLICATIONS	270	14.6	24	4.292		24	0	0
10.1016/j.patcog.2010.08.011	Mining data with random forests: A survey and results of new tests	PATTERN RECOGNITION	269	1	1	5.898		1	0	0
10.1016/j.patcog.2012.03.004	An extensive experimental comparison of methods for multi-label learning	PATTERN RECOGNITION	266	9.064	2	5.898		0	0	0
10.1016/j.neunet.2007.12.031	Training neural network classifiers for medical decision making: The effects of imbalanced datasets on classification performance	NEURAL NETWORKS	265	3	1	5.785		0	0	0
10.1016/j.dss.2010.08.006	The application of data mining techniques in financial fraud detection: A classification framework and an academic review of literature	DECISION SUPPORT SYSTEMS	264	3.25	2	3.847		1	0	0
10.1007/s10994-009-5103-0	NP-hardness of Euclidean sum-of-squares clustering	MACHINE LEARNING	264	3	1	2.809		0	0	0
10.1016/j.eswa.2008.10.071	Context-aware systems: A literature review and classification	EXPERT SYSTEMS WITH APPLICATIONS	263	3	1	4.292		0	1	0
10.1016/j.patcog.2009.01.018	A survey of palmprint recognition	PATTERN RECOGNITION	262	3	2	5.898		0	2	0
10.1016/j.patcog.2009.04.017	Face recognition across pose: A review	PATTERN RECOGNITION	261	9	4	5.898		0	4	0
10.1007/s10994-009-5152-4	A theory of learning from different domains	MACHINE LEARNING	261	3.5	2	2.809		1	0	0
10.1007/s10994-008-5077-3	Decision trees for hierarchical multi-label classification	MACHINE LEARNING	258	6	3	2.809		0	3	0
10.1007/s10846-008-9235-4	Visual navigation for mobile robots: A survey	JOURNAL OF INTELLIGENT & ROBOTIC SYSTEMS	257	6	2	2.02		0	2	0
10.1007/s00138-008-0132-4	Crowd analysis: a survey	MACHINE VISION AND APPLICATIONS	255	12	9	1.788		0	7	0
10.1016/j.dss.2009.02.005	Encouraging information security behaviors in organizations: Role of penalties pressures and perceived effectiveness	DECISION SUPPORT SYSTEMS	254	0.5	1	3.847		1	0	0
10.1016/j.neucom.2007.11.026	Natural Actor-Critic	NEUROCOMPUTING	251	6.5	7	4.072		1	6	0
10.1016/j.datak.2008.05.001	Change patterns and change support features - Enhancing flexibility in process-aware information systems	DATA & KNOWLEDGE ENGINEERING	248	4.5	10	1.583		2	8	0
10.1016/j.imavis.2007.10.012	Multifocus image fusion using region segmentation and spatial frequency	IMAGE AND VISION COMPUTING	248	3	7	2.733		0	7	0
10.1016/j.patrec.2012.07.005	Intelligent multi-camera video surveillance: A review	PATTERN RECOGNITION LETTERS	245	6	5	2.81		0	5	0
10.1016/j.asoc.2007.10.007	A distributed PSO-SVM hybrid system with feature selection and parameter optimization	APPLIED SOFT COMPUTING	245	3	2	4.873		0	2	0
10.1016/j.dss.2012.01.015	What drives consumers to spread electronic word of mouth in online consumer-opinion platforms	DECISION SUPPORT SYSTEMS	245	2.85	3	3.847		2	0	0
10.1016/j.patcog.2007.10.011	Palmprint verification based on robust line orientation code	PATTERN RECOGNITION	244	3	1	5.898		0	1	0
10.1016/j.dss.2009.02.008	Virtual communities: A marketing perspective	DECISION SUPPORT SYSTEMS	243	4	3	3.847		1	0	0
10.1016/j.neunet.2008.03.006	Powered ankle-foot prosthesis to assist level-ground and stair-descent gaits	NEURAL NETWORKS	242	6	44	5.785		0	44	0
10.1016/j.patcog.2008.05.018	Learning a Mahalanobis distance metric for data clustering and classification	PATTERN RECOGNITION	242	3	5	5.898		0	5	0
10.1007/s10514-013-9327-2	Comparing ICP variants on real-world data sets	AUTONOMOUS ROBOTS	241	3.5	7	3.634		0	1	0
10.1016/j.eswa.2008.07.035	Sentiment classification of online reviews to travel destinations by supervised machine learning approaches	EXPERT SYSTEMS WITH APPLICATIONS	240	3	4	4.292		0	4	0
10.1016/j.websem.2008.06.001	YAGO: A Large Ontology from Wikipedia and WordNet	JOURNAL OF WEB SEMANTICS	240	3	3	2.429		0	3	0
10.1016/j.eswa.2009.04.063	Group decision making process for supplier selection with VIKOR under fuzzy environment	EXPERT SYSTEMS WITH APPLICATIONS	239	4	3	4.292		1	2	0
10.1016/j.neunet.2009.04.003	A new supervised learning algorithm for multiple spiking neural networks with application in epilepsy and seizure detection	NEURAL NETWORKS	239	3	1	5.785		0	1	0
10.1016/j.patcog.2007.04.010	Robust path-based spectral clustering	PATTERN RECOGNITION	239	3	1	5.898		0	1	0
10.1007/s10044-008-0141-y	A survey of graph edit distance	PATTERN ANALYSIS AND APPLICATIONS	234	6	5	1.41		0	4	0
10.1007/s10514-010-9205-0	Cooperative manipulation and transportation with aerial robots	AUTONOMOUS ROBOTS	234	3	4	3.634		0	4	0
10.1016/j.patrec.2011.01.004	Face recognition using Histograms of Oriented Gradients	PATTERN RECOGNITION LETTERS	234	3	3	2.81		0	3	0
10.1137/110848074	Phase Retrieval via Matrix Completion	SIAM JOURNAL ON IMAGING SCIENCES	234	3	2	2.514		0	2	0
10.1016/j.eswa.2012.02.038	A literature review and classification of recommender systems research	EXPERT SYSTEMS WITH APPLICATIONS	234	0.5	1	4.292		1	0	0
10.1016/j.inffus.2016.09.005	Multi-sensor fusion in body sensor networks: State-of-the-art and research challenges	INFORMATION FUSION	234	0.25	1	10.716		1	0	0
10.1016/j.inffus.2015.08.005	Social big data: Recent achievements and new challenges	INFORMATION FUSION	233	8.258	4	10.716		3	0	0
10.1002/widm.30	Density-based clustering	WILEY INTERDISCIPLINARY REVIEWS-DATA MINING AND KNOWLEDGE DISCOVERY	233	3	2	2.541		0	0	0
10.1016/j.inffus.2016.05.004	Pixel-level image fusion: A survey of the state of the art	INFORMATION FUSION	233	3	1	10.716		0	0	0
10.1007/s11263-007-0071-y	3-d depth reconstruction from a single still image	INTERNATIONAL JOURNAL OF COMPUTER VISION	231	9	16	6.071		0	16	0
10.1016/j.cogsys.2006.07.004	Cognitive architectures: Research issues and challenges	COGNITIVE SYSTEMS RESEARCH	230	4	2	1.384		1	1	0
10.1007/s11263-008-0168-y	Adaptive Stochastic Gradient Descent Optimisation for Image Registration	INTERNATIONAL JOURNAL OF COMPUTER VISION	226	6	2	6.071		0	2	0
10.1016/j.patrec.2008.08.010	An experimental comparison of performance measures for classification	PATTERN RECOGNITION LETTERS	226	3	2	2.81		0	2	0
10.1002/widm.1075	Data mining in education	WILEY INTERDISCIPLINARY REVIEWS-DATA MINING AND KNOWLEDGE DISCOVERY	224	8.85	10	2.541		9	0	0
10.1016/j.websem.2007.11.011	Collective knowledge systems: Where the Social Web meets the Semantic Web	JOURNAL OF WEB SEMANTICS	223	6.5	87	2.429		1	85	0
10.1007/s11263-013-0658-4	A Multi-View Embedding Space for Modeling Internet Images Tags and Their Semantics	INTERNATIONAL JOURNAL OF COMPUTER VISION	222	3	1	6.071		0	1	0
10.1016/j.eswa.2009.03.024	Determinants of behavioral intention to mobile banking	EXPERT SYSTEMS WITH APPLICATIONS	221	8	1	4.292		0	0	1
10.1016/j.media.2008.06.001	Cell population tracking and lineage construction with spatiotemporal context	MEDICAL IMAGE ANALYSIS	221	3	11	8.88		0	11	0
10.1007/s00521-012-1028-9	Bat algorithm for constrained optimization tasks	NEURAL COMPUTING & APPLICATIONS	220	0.5	1	4.664		1	0	0
10.1016/j.neunet.2014.02.003	Matrix measure strategies for stability and synchronization of inertial BAM neural network with time delays	NEURAL NETWORKS	220	0.25	1	5.785		0	0	0
10.1016/j.eswa.2007.12.043	Using EEG spectral components to assess algorithms for detecting fatigue	EXPERT SYSTEMS WITH APPLICATIONS	219	6	4	4.292		0	4	0
10.1016/j.imavis.2009.11.005	A new ranking method for principal components analysis and its application to face image analysis	IMAGE AND VISION COMPUTING	219	3	1	2.733		0	1	0
10.1016/j.patrec.2008.04.005	Semantic object classes in video: A high-definition ground truth database	PATTERN RECOGNITION LETTERS	219	3	1	2.81		0	1	0
10.1016/j.patcog.2011.05.013	A review on automatic image annotation techniques	PATTERN RECOGNITION	218	4	2	5.898		1	1	0
10.1016/j.asoc.2010.08.024	Recent Advances in Artificial Immune Systems: Models and Applications	APPLIED SOFT COMPUTING	217	3	1	4.873		0	1	0
10.1016/j.knosys.2013.02.014	Automated EEG analysis of epilepsy: A review	KNOWLEDGE-BASED SYSTEMS	216	3	2	5.101		0	2	0
10.1016/j.neunet.2009.06.042	A new learning paradigm: Learning using privileged information	NEURAL NETWORKS	216	1.5	3	5.785		3	0	0
10.1016/j.patcog.2009.03.004	Interactive image segmentation by maximal similarity based region merging	PATTERN RECOGNITION	215	6	4	5.898		0	4	0
10.1016/j.dss.2012.05.048	Leveraging the capabilities of service-oriented decision support systems: Putting analytics and big data in cloud	DECISION SUPPORT SYSTEMS	215	6	7	3.847		7	0	0
10.1016/j.dss.2010.01.010	The impact of personal dispositions on information sensitivity privacy concern and trust in disclosing health information online	DECISION SUPPORT SYSTEMS	215	6	3	3.847		0	2	0
10.1007/s10115-012-0487-8	A review of feature selection methods on synthetic data	KNOWLEDGE AND INFORMATION SYSTEMS	215	1	1	2.397		1	0	0
10.1016/j.patcog.2010.04.019	Comparative study on classifying human activities with miniature inertial and magnetic sensors	PATTERN RECOGNITION	214	12	5	5.898		0	4	0
10.1016/j.artint.2007.05.008	Conjunctive and disjunctive combination of belief functions induced by nondistinct bodies of evidence	ARTIFICIAL INTELLIGENCE	214	3	1	4.483		0	1	0
10.1016/j.media.2015.06.012	Multi-atlas segmentation of biomedical images: A survey	MEDICAL IMAGE ANALYSIS	214	0.25	1	8.88		0	0	0
10.1016/j.patcog.2008.01.024	Automatic feature localisation with constrained local models	PATTERN RECOGNITION	213	19	9	5.898		0	7	2
10.1016/j.patcog.2007.09.010	SVD based initialization: A head start for nonnegative matrix factorization	PATTERN RECOGNITION	213	3.5	2	5.898		1	0	0
10.1016/j.media.2012.05.008	MIND: Modality independent neighbourhood descriptor for multi-modal deformable registration	MEDICAL IMAGE ANALYSIS	213	3	1	8.88		0	1	0
10.1137/120896219	Fast Alternating Direction Optimization Methods	SIAM JOURNAL ON IMAGING SCIENCES	212	3	3	2.514		0	3	0
10.1007/s11263-008-0137-5	Putting objects in perspective	INTERNATIONAL JOURNAL OF COMPUTER VISION	212	3	4	6.071		0	4	0
10.1002/widm.1045	Replaying history on process models for conformance checking and performance analysis	WILEY INTERDISCIPLINARY REVIEWS-DATA MINING AND KNOWLEDGE DISCOVERY	211	3	1	2.541		0	1	0
10.1016/j.patcog.2016.07.001	Towards better exploiting convolutional neural networks for remote sensing scene classification	PATTERN RECOGNITION	211	2.75	4	5.898		4	0	0
10.1007/s00138-014-0623-4	Super-resolution: a comprehensive survey	MACHINE VISION AND APPLICATIONS	210	6	6	1.788		0	6	0
10.4018/jswis.2012010101	Semantics for the Internet of Things: Early Progress and Back to the Future	INTERNATIONAL JOURNAL ON SEMANTIC WEB AND INFORMATION SYSTEMS	209	3	2	1.833		0	2	0
10.1016/j.asoc.2009.07.001	An efficient hybrid approach based on PSO ACO and k-means for cluster analysis	APPLIED SOFT COMPUTING	207	3	1	4.873		0	0	0
10.1007/s11263-011-0431-5	Evaluation of Interest Point Detectors and Feature Descriptors for Visual Tracking	INTERNATIONAL JOURNAL OF COMPUTER VISION	206	6	3	6.071		0	3	0
10.1016/j.websem.2008.04.001	Managing uncertainty and vagueness in description logics for the Semantic Web	JOURNAL OF WEB SEMANTICS	206	3	1	2.429		0	0	0
10.1016/j.patcog.2012.11.011	Analysis of focus measure operators for shape-from-focus	PATTERN RECOGNITION	205	13	11	5.898		1	10	0
10.1016/j.patcog.2011.09.021	A novel hybrid CNN-SVM classifier for recognizing handwritten digits	PATTERN RECOGNITION	205	10	7	5.898		1	6	0
10.1016/j.patcog.2010.09.013	A global averaging method for dynamic time warping with applications to clustering	PATTERN RECOGNITION	205	6	2	5.898		0	1	0
10.1016/j.dss.2009.09.003	Using text mining and sentiment analysis for online forums hotspot detection and forecast	DECISION SUPPORT SYSTEMS	205	3	2	3.847		0	2	0
10.1016/j.cviu.2013.11.009	Robust PCA via Principal Component Pursuit: A review for a comparative evaluation in video surveillance	COMPUTER VISION AND IMAGE UNDERSTANDING	204	6	3	2.645		0	1	0
10.1007/s11263-013-0644-x	A Quantitative Analysis of Current Practices in Optical Flow Estimation and the Principles Behind Them	INTERNATIONAL JOURNAL OF COMPUTER VISION	203	4	2	6.071		1	1	0
10.1016/j.media.2010.02.004	A new computationally efficient CAD system for pulmonary nodule detection in CT imagery	MEDICAL IMAGE ANALYSIS	203	0.25	7	8.88		0	0	0
10.1016/j.knosys.2010.01.013	A DEMATEL method in identifying key success factors of hospital service quality	KNOWLEDGE-BASED SYSTEMS	202	1	1	5.101		1	0	0
10.1007/s10618-008-0114-1	Controlled experiments on the web: survey and practical guide	DATA MINING AND KNOWLEDGE DISCOVERY	199	17.264	10	2.879		4	3	0
10.1016/j.media.2016.07.007	Large scale deep learning for computer aided detection of mammographic lesions	MEDICAL IMAGE ANALYSIS	199	14.382	6	8.88		4	0	0
10.1007/s11263-007-0118-0	Object class recognition and localization using sparse features with limited receptive fields	INTERNATIONAL JOURNAL OF COMPUTER VISION	199	3	2	6.071		0	2	0
10.1016/j.patcog.2007.04.003	Real-time line detection through an improved Hough transform voting scheme	PATTERN RECOGNITION	198	12	6	5.898		0	5	0
10.1016/j.eswa.2014.01.021	Computer-aided diagnosis of human brain tumor through MRI: A survey and a new algorithm	EXPERT SYSTEMS WITH APPLICATIONS	198	3	2	4.292		0	0	0
10.1016/j.eswa.2013.10.059	Cuckoo search algorithm and wind driven optimization based study of satellite image segmentation for multilevel thresholding using Kapur's entropy	EXPERT SYSTEMS WITH APPLICATIONS	198	0.25	1	4.292		0	0	0
10.1016/j.patcog.2010.09.022	Weighted dynamic time warping for time series classification	PATTERN RECOGNITION	198	0.25	1	5.898		0	0	0
10.1016/j.media.2008.06.006	Automatic CT-ultrasound registration for diagnostic imaging and image-guided intervention	MEDICAL IMAGE ANALYSIS	197	9	22	8.88		0	22	0
10.1007/s10851-014-0511-6	Color Image Analysis by Quaternion-Type Moments	JOURNAL OF MATHEMATICAL IMAGING AND VISION	196	1	1	1.603		1	0	0
10.1016/j.eswa.2008.06.054	Feature selection for text classification with Naive Bayes	EXPERT SYSTEMS WITH APPLICATIONS	196	0.25	1	4.292		0	0	0
10.1016/j.patcog.2007.11.016	Gesture spotting with body-worn inertial sensors to detect user activities	PATTERN RECOGNITION	195	6	6	5.898		0	6	0
10.1016/j.patcog.2008.10.028	Feature selection with dynamic mutual information	PATTERN RECOGNITION	195	4	5	5.898		1	4	0
10.1007/s10618-014-0365-y	Graph based anomaly detection and description: a survey	DATA MINING AND KNOWLEDGE DISCOVERY	195	3.5	2	2.879		1	1	0
10.1145/1889681.1889683	Learning Travel Recommendations from User-Generated GPS Traces	ACM TRANSACTIONS ON INTELLIGENT SYSTEMS AND TECHNOLOGY	195	3	1	2.861		0	1	0
10.1016/j.patrec.2011.05.016	Learning local binary patterns for gender classification on real-world face images	PATTERN RECOGNITION LETTERS	194	3.55	4	2.81		4	0	0
10.1016/j.neunet.2012.09.017	Adaptive Resonance Theory: How a brain learns to consciously attend learn and recognize a changing world	NEURAL NETWORKS	193	1.5	2	5.785		1	0	0
10.1007/s10462-010-9155-0	Review of brain MRI image segmentation methods	ARTIFICIAL INTELLIGENCE REVIEW	193	1	1	5.095		1	0	0
10.1016/j.asoc.2008.05.006	Dimensionality reduction based on rough set theory: A review	APPLIED SOFT COMPUTING	192	3	1	4.873		0	1	0
10.1016/j.eswa.2013.01.019	More than words: Social networks' text mining for consumer brand sentiments	EXPERT SYSTEMS WITH APPLICATIONS	192	1.25	2	4.292		1	0	0
10.1016/j.eswa.2012.07.059	Document-level sentiment classification: An empirical comparison between SVM and ANN	EXPERT SYSTEMS WITH APPLICATIONS	191	4	4	4.292		1	3	0
10.1016/j.patrec.2014.04.011	Human activity recognition from 3D data: A review	PATTERN RECOGNITION LETTERS	191	0.5	1	2.81		1	0	0
10.1111/coin.12017	A SURVEY OF TECHNIQUES FOR EVENT DETECTION IN TWITTER	COMPUTATIONAL INTELLIGENCE	190	5	6	0.776		6	0	0
10.1016/j.patcog.2011.01.004	A survey of multilinear subspace learning for tensor data	PATTERN RECOGNITION	190	3	5	5.898		0	0	0
10.3389/fnbot.2013.00021	Gradient boosting machines a tutorial	FRONTIERS IN NEUROROBOTICS	189	114.63	141	3		134	0	0
10.1016/j.bdr.2015.01.006	Significance and Challenges of Big Data Research	BIG DATA RESEARCH	189	1.25	2	2.952		2	0	0
10.1016/j.media.2011.06.001	Efficient MR image reconstruction for compressed MR imaging	MEDICAL IMAGE ANALYSIS	184	3	1	8.88		0	1	0
10.1016/j.knosys.2013.11.015	Optimal parameters selection for BP neural network based on particle swarm optimization: A case study of wind speed forecasting	KNOWLEDGE-BASED SYSTEMS	184	0.25	1	5.101		0	0	0
10.1016/j.imavis.2014.02.001	A survey of approaches and trends in person re-identification	IMAGE AND VISION COMPUTING	183	3	1	2.733		0	1	0
10.1016/j.media.2009.06.003	Standardized evaluation methodology and reference database for evaluating coronary artery centerline extraction algorithms	MEDICAL IMAGE ANALYSIS	183	3	1	8.88		0	1	0
10.1016/j.eswa.2010.10.027	Predicting direction of stock price index movement using artificial neural networks and support vector machines: The sample of the Istanbul Stock Exchange	EXPERT SYSTEMS WITH APPLICATIONS	182	1.85	2	4.292		2	0	0
10.1007/s10514-009-9115-1	Model based vehicle detection and tracking for autonomous urban driving	AUTONOMOUS ROBOTS	181	3	3	3.634		0	3	0
10.1016/j.patrec.2011.11.004	Crack Tree: Automatic crack detection from pavement images	PATTERN RECOGNITION LETTERS	179	6	2	2.81		0	2	0
10.1016/j.media.2013.05.008	Medical image processing on the GPU - Past present and future	MEDICAL IMAGE ANALYSIS	178	15.13	15	8.88		14	0	0
10.1007/s00521-009-0295-6	Pattern classification with missing data: a review	NEURAL COMPUTING & APPLICATIONS	178	6	2	4.664		0	2	0
10.1016/j.asoc.2014.10.035	An overview of fuzzy research with bibliometric indicators	APPLIED SOFT COMPUTING	178	3	1	4.873		0	0	0
10.1016/j.knosys.2014.03.015	Binary PSO with mutation operator for feature selection using decision tree applied to spam detection	KNOWLEDGE-BASED SYSTEMS	178	3	1	5.101		0	0	0
10.1016/j.media.2008.03.007	Registration-based estimates of local lung tissue expansion compared to xenon CT measures of specific ventilation	MEDICAL IMAGE ANALYSIS	177	6	6	8.88		0	6	0
10.1002/widm.1072	Overview of random forest methodology and practical guidance with emphasis on computational biology and bioinformatics	WILEY INTERDISCIPLINARY REVIEWS-DATA MINING AND KNOWLEDGE DISCOVERY	176	4.6	9	2.541		9	0	0
10.1016/j.neucom.2013.03.047	Time series forecasting using a deep belief network with restricted Boltzmann machines	NEUROCOMPUTING	176	0.75	2	4.072		1	0	0
10.1016/j.media.2009.02.004	Automated model-based vertebra detection identification and segmentation in CT images	MEDICAL IMAGE ANALYSIS	175	15	17	8.88		0	17	0
10.1016/j.cviu.2013.01.013	A survey of video datasets for human action and activity recognition	COMPUTER VISION AND IMAGE UNDERSTANDING	175	7.7	10	2.645		8	0	0
10.1016/j.eswa.2006.09.038	Churn prediction in subscription services: An application of support vector machines while comparing two parameter-selection techniques	EXPERT SYSTEMS WITH APPLICATIONS	175	3	1	4.292		0	1	0
10.1007/s12559-010-9074-z	Clustering of Gaze During Dynamic Scene Viewing is Predicted by Motion	COGNITIVE COMPUTATION	175	3	1	4.287		0	1	0
10.1016/j.asoc.2007.10.012	Parameter determination of support vector machine and feature selection using simulated annealing approach	APPLIED SOFT COMPUTING	175	3	1	4.873		0	1	0
10.1016/j.neucom.2013.08.004	LibD3C: Ensemble classifiers with a clustering and dynamic selection strategy	NEUROCOMPUTING	174	1	1	4.072		1	0	0
10.1016/j.dss.2014.02.003	Predicting crime using Twitter and kernel density estimation	DECISION SUPPORT SYSTEMS	173	86.1	47	3.847		38	0	5
10.1145/1342171.1342172	Agile Dynamic Provisioning of Multi-Tier Internet Applications	ACM TRANSACTIONS ON AUTONOMOUS AND ADAPTIVE SYSTEMS	173	6	29	2.66		0	29	0
10.1016/j.patcog.2008.10.013	Fast connected-component labeling	PATTERN RECOGNITION	173	6	2	5.898		0	2	0
10.1016/j.asoc.2012.09.024	Support vector regression with chaos-based firefly algorithm for stock market price forecasting	APPLIED SOFT COMPUTING	173	0.25	1	4.873		1	0	0
10.1016/j.eswa.2008.02.039	Hybrid Nelder-Mead simplex search and particle swarm optimization for constrained engineering design problems	EXPERT SYSTEMS WITH APPLICATIONS	172	6	2	4.292		0	2	0
10.1016/j.dss.2013.07.002	A study of mobile user engagement (MoEN): Engagement motivations perceived value satisfaction and continued engagement intention	DECISION SUPPORT SYSTEMS	171	35.75	6	3.847		1	0	4
10.1002/widm.53	Algorithms for hierarchical clustering: an overview	WILEY INTERDISCIPLINARY REVIEWS-DATA MINING AND KNOWLEDGE DISCOVERY	171	4.85	3	2.541		2	0	0
10.1016/j.patrec.2013.02.006	A survey of human motion analysis using depth imagery	PATTERN RECOGNITION LETTERS	171	4	4	2.81		2	2	0
10.1016/j.dss.2008.06.007	Identification of influencers - Measuring influence in customer networks	DECISION SUPPORT SYSTEMS	171	4	4	3.847		1	3	0
10.1016/j.cviu.2008.07.003	Performance evaluation of local colour invariants	COMPUTER VISION AND IMAGE UNDERSTANDING	171	3	2	2.645		0	2	0
10.1016/j.media.2012.09.005	Respiratory motion models: A review	MEDICAL IMAGE ANALYSIS	170	9	4	8.88		0	4	0
10.1007/s10618-010-0181-y	Community discovery using nonnegative matrix factorization	DATA MINING AND KNOWLEDGE DISCOVERY	170	3	1	2.879		0	1	0
10.1016/j.patcog.2011.03.009	Defocus map estimation from a single image	PATTERN RECOGNITION	170	3	4	5.898		0	4	0
10.1016/j.eswa.2008.11.028	Stock market prediction of S&P 500 via combination of improved BCO approach and BP neural network	EXPERT SYSTEMS WITH APPLICATIONS	170	3	1	4.292		0	0	0
10.1016/j.patcog.2012.09.015	A survey of graph theoretical approaches to image segmentation	PATTERN RECOGNITION	169	6	2	5.898		0	2	0
10.1007/s00138-013-0570-5	Thermal cameras and applications: a survey	MACHINE VISION AND APPLICATIONS	169	3.5	3	1.788		1	2	0
10.1016/j.eswa.2010.06.066	A novel intrusion detection system based on hierarchical clustering and support vector machines	EXPERT SYSTEMS WITH APPLICATIONS	169	0.25	1	4.292		0	0	0
10.1016/j.patcog.2012.02.005	Discriminant sparse neighborhood preserving embedding for face recognition	PATTERN RECOGNITION	167	0.25	1	5.898		1	0	0
10.1016/j.artint.2013.06.003	Multiple instance classification: Review taxonomy and comparative study	ARTIFICIAL INTELLIGENCE	166	4	5	4.483		4	0	0
10.1016/j.cviu.2007.01.003	Modeling inter-camera space-time and appearance relationships for tracking across non-overlapping views	COMPUTER VISION AND IMAGE UNDERSTANDING	165	12	16	2.645		0	16	0
10.1007/s11263-016-0981-7	Visual Genome: Connecting Language and Vision Using Crowdsourced Dense Image Annotations	INTERNATIONAL JOURNAL OF COMPUTER VISION	165	5.35	4	6.071		3	0	0
10.1016/j.imavis.2007.07.010	A comparative study of deformable contour methods on medical image segmentation	IMAGE AND VISION COMPUTING	164	3	2	2.733		0	2	0
10.1016/j.eswa.2010.08.066	A comparative study of TF*IDF LSI and multi-words for text classification	EXPERT SYSTEMS WITH APPLICATIONS	164	3	4	4.292		0	4	0
10.1007/s10514-015-9479-3	Optimization-based locomotion planning estimation and control design for the atlas humanoid robot	AUTONOMOUS ROBOTS	164	0.75	2	3.634		1	0	0
10.1016/j.eswa.2013.05.057	Twitter brand sentiment analysis: A hybrid system using n-gram analysis and dynamic artificial neural network	EXPERT SYSTEMS WITH APPLICATIONS	163	3.25	5	4.292		0	4	0
10.1007/s10115-009-0276-1	Application of correlation coefficient to interval-valued intuitionistic fuzzy multiple attribute decision-making with incomplete weight information	KNOWLEDGE AND INFORMATION SYSTEMS	163	3	1	2.397		0	1	0
10.1016/j.eswa.2016.04.032	Human activity recognition with smartphone sensors using deep learning neural networks	EXPERT SYSTEMS WITH APPLICATIONS	162	3.25	2	4.292		0	1	0
10.1016/j.patcog.2008.08.001	Performance of feature-selection methods in the classification of high-dimension data	PATTERN RECOGNITION	162	3	1	5.898		0	0	0
10.1016/j.eswa.2009.02.063	A survey on sentiment detection of reviews	EXPERT SYSTEMS WITH APPLICATIONS	161	7	13	4.292		0	11	0
10.1016/j.aei.2015.01.008	A review on computer vision based defect detection and condition assessment of concrete and asphalt civil infrastructure	ADVANCED ENGINEERING INFORMATICS	161	4	2	3.772		1	1	0
10.1016/j.imavis.2014.06.002	BP4D-Spontaneous: a high-resolution spontaneous 3D dynamic facial expression database	IMAGE AND VISION COMPUTING	161	0	1	2.733		0	0	0
10.1016/j.media.2009.12.006	Glaucoma risk index: Automated glaucoma detection from color fundus images	MEDICAL IMAGE ANALYSIS	160	6	2	8.88		0	1	0
10.1016/j.knosys.2011.07.021	A collaborative filtering approach to mitigate the new user cold start problem	KNOWLEDGE-BASED SYSTEMS	160	3.5	3	5.101		1	0	0
10.1016/j.eswa.2013.12.026	An approach to fault diagnosis of reciprocating compressor valves using Teager-Kaiser energy operator and deep belief networks	EXPERT SYSTEMS WITH APPLICATIONS	160	3	1	4.292		0	1	0
10.1007/s11263-009-0220-6	Viewpoint Invariant Texture Description Using Fractal Analysis	INTERNATIONAL JOURNAL OF COMPUTER VISION	160	3	1	6.071		0	1	0
10.1007/s11263-007-0056-x	On the local behavior of spaces of natural images	INTERNATIONAL JOURNAL OF COMPUTER VISION	159	4.5	3	6.071		2	0	0
10.1016/j.patcog.2007.10.015	From dynamic classifier selection to dynamic ensemble selection	PATTERN RECOGNITION	159	3	1	5.898		0	1	0
10.1016/j.eswa.2008.05.027	Handling class imbalance in customer churn prediction	EXPERT SYSTEMS WITH APPLICATIONS	159	3	1	4.292		0	1	0
10.1016/j.eswa.2012.01.073	Plant species identification using digital morphometrics: A review	EXPERT SYSTEMS WITH APPLICATIONS	159	1.5	2	4.292		1	0	0
10.1016/j.neucom.2007.11.032	A comprehensive review of current local features for computer vision	NEUROCOMPUTING	158	6.25	4	4.072		0	3	0
10.1016/j.patcog.2007.08.016	Palmprint verification based on principal lines	PATTERN RECOGNITION	158	6	3	5.898		0	3	0
10.1016/j.ijar.2007.03.004	The Dempster-Shafer calculus for statisticians	INTERNATIONAL JOURNAL OF APPROXIMATE REASONING	158	3	2	1.982		0	0	0
10.1016/j.dss.2009.04.004	Steal my idea! Organizational adoption of user innovations from a user innovation community: A case study of Dell IdeaStorm	DECISION SUPPORT SYSTEMS	157	0	1	3.847		0	0	0
10.1016/j.aei.2009.09.001	Systems integration and collaboration in architecture engineering construction and facilities management: A review	ADVANCED ENGINEERING INFORMATICS	155	3	1	3.772		0	1	0
10.1016/j.imavis.2009.05.007	The painful face - Pain expression recognition using active appearance models	IMAGE AND VISION COMPUTING	154	4	4	2.733		2	2	0
10.1016/j.eswa.2008.03.008	An expert system for fault diagnosis in internal combustion engines using wavelet packet transform and neural network	EXPERT SYSTEMS WITH APPLICATIONS	154	3	1	4.292		0	1	0
10.1016/j.artmed.2012.08.002	Computerized analysis of pigmented skin lesions: A review	ARTIFICIAL INTELLIGENCE IN MEDICINE	153	12.5	9	3.574		1	8	0
10.1016/j.eswa.2013.09.005	Facing the cold start problem in recommender systems	EXPERT SYSTEMS WITH APPLICATIONS	153	10	2	4.292		0	0	1
10.1007/s11554-012-0246-9	Fall detection system using Kinect's infrared sensor	JOURNAL OF REAL-TIME IMAGE PROCESSING	152	3.1	7	2.588		7	0	0
10.1016/j.eswa.2007.06.006	Prediction of compressive and tensile strength of limestone via genetic programming	EXPERT SYSTEMS WITH APPLICATIONS	152	3	32	4.292		0	32	0
10.1016/j.asoc.2014.02.002	Support vector machine applications in the field of hydrology: A review	APPLIED SOFT COMPUTING	152	1	1	4.873		1	0	0
10.1016/j.patrec.2010.05.027	Gait recognition without subject cooperation	PATTERN RECOGNITION LETTERS	151	3	1	2.81		0	1	0
10.1016/j.inffus.2017.02.003	A review of affective computing: From unimodal analysis to multimodal fusion	INFORMATION FUSION	150	3.25	4	10.716		1	0	0
10.1016/j.patcog.2013.05.025	Training restricted Boltzmann machines: An introduction	PATTERN RECOGNITION	149	6	3	5.898		0	2	0
10.1016/j.imavis.2009.06.007	Review of pulse-coupled neural networks	IMAGE AND VISION COMPUTING	149	3	2	2.733		0	2	0
10.1016/j.patcog.2007.07.012	Minutiae feature analysis for infrared hand vein pattern biometrics	PATTERN RECOGNITION	148	3	4	5.898		0	4	0
10.1016/j.patcog.2011.05.006	Facial expression recognition using radial encoding of local Gabor features and classifier synthesis	PATTERN RECOGNITION	148	1	1	5.898		1	0	0
10.1007/s11263-012-0601-0	Rotation Averaging	INTERNATIONAL JOURNAL OF COMPUTER VISION	147	3	1	6.071		0	1	0
10.1016/j.neucom.2010.11.030	A study on effectiveness of extreme learning machine	NEUROCOMPUTING	147	1.75	4	4.072		4	0	0
10.1016/j.cviu.2007.09.003	Numerical methods for shape-from-shadling: A new survey with benchmarks	COMPUTER VISION AND IMAGE UNDERSTANDING	146	12	6	2.645		0	6	0
10.1016/j.asoc.2009.08.029	Simplifying Particle Swarm Optimization	APPLIED SOFT COMPUTING	146	3	2	4.873		0	0	0
10.1002/widm.2	Robust statistics for outlier detection	WILEY INTERDISCIPLINARY REVIEWS-DATA MINING AND KNOWLEDGE DISCOVERY	146	2.35	3	2.541		3	0	0
10.1007/s11263-012-0515-x	TILT: Transform Invariant Low-Rank Textures	INTERNATIONAL JOURNAL OF COMPUTER VISION	144	6	2	6.071		0	2	0
10.1016/j.patrec.2013.08.006	Low rank subspace clustering (LRSC)	PATTERN RECOGNITION LETTERS	144	3	1	2.81		0	0	0
10.1007/s10994-010-5188-5	The security of machine learning	MACHINE LEARNING	144	1.5	4	2.809		4	0	0
10.1016/j.eswa.2014.06.009	Text mining for market prediction: A systematic review	EXPERT SYSTEMS WITH APPLICATIONS	143	4	3	4.292		2	0	0
10.1016/j.inffus.2016.12.001	Multi-focus image fusion with a deep convolutional neural network	INFORMATION FUSION	143	3	1	10.716		0	0	0
10.1016/j.dss.2010.03.007	The impact of business analytics on supply chain performance	DECISION SUPPORT SYSTEMS	142	3.25	3	3.847		0	2	0
10.1007/s10994-010-5205-8	Relational retrieval using a combination of path-constrained random walks	MACHINE LEARNING	142	3	4	2.809		0	4	0
10.1016/j.csl.2009.04.001	The Hidden Information State model: A practical framework for POMDP-based spoken dialogue management	COMPUTER SPEECH AND LANGUAGE	142	3	8	1.857		0	8	0
10.1137/100814494	Convergence Analysis of Primal-Dual Algorithms for a Saddle-Point Problem: From Contraction Perspective	SIAM JOURNAL ON IMAGING SCIENCES	142	0.5	1	2.514		1	0	0
10.1016/j.asoc.2017.06.004	Study on an improved adaptive PSO algorithm for solving multi-objective gate assignment	APPLIED SOFT COMPUTING	142	0.5	1	4.873		1	0	0
10.1016/j.cviu.2010.02.004	Context based object categorization: A critical survey	COMPUTER VISION AND IMAGE UNDERSTANDING	141	9	3	2.645		0	3	0
10.1016/j.inffus.2009.05.003	MRI and PET image fusion by combining IHS and retina-inspired models	INFORMATION FUSION	141	3	1	10.716		0	1	0
10.1016/j.patrec.2009.11.008	Image scrambling encryption algorithm of pixel bit based on chaos map	PATTERN RECOGNITION LETTERS	141	0.25	1	2.81		0	0	0
10.1016/j.artmed.2008.04.007	Support vector machine-based arrhythmia classification using reduced features of heart rate variability signal	ARTIFICIAL INTELLIGENCE IN MEDICINE	140	6	2	3.574		0	2	0
10.1016/j.neucom.2016.01.034	A Deep Convolutional Neural Network for segmenting and classifying epithelial and stromal regions in histopathological images	NEUROCOMPUTING	140	3.8	7	4.072		7	0	0
10.1016/j.aei.2011.01.002	Pothole detection in asphalt pavement images	ADVANCED ENGINEERING INFORMATICS	140	3	7	3.772		0	7	0
10.1016/j.eswa.2009.12.061	Use of social network information to enhance collaborative filtering performance	EXPERT SYSTEMS WITH APPLICATIONS	139	3	4	4.292		0	4	0
10.1016/j.eswa.2012.04.078	An efficient method for segmentation of images based on fractional calculus and natural selection	EXPERT SYSTEMS WITH APPLICATIONS	139	0.25	1	4.292		0	0	0
10.1016/j.inffus.2007.07.002	Classifier ensembles: Select real-world applications	INFORMATION FUSION	138	3.25	3	10.716		0	2	0
10.1007/s10817-009-9155-4	A Formally Verified Compiler Back-end	JOURNAL OF AUTOMATED REASONING	138	3	1	1.172		0	0	0
10.1016/j.patcog.2014.01.016	A review of biometric technology along with trends and prospects	PATTERN RECOGNITION	138	3	1	5.898		0	1	0
10.1016/j.eswa.2006.09.003	Data mining to improve personnel selection and enhance human capital: A case study in high-technology industry	EXPERT SYSTEMS WITH APPLICATIONS	138	3	2	4.292		0	2	0
10.1016/j.neunet.2010.06.002	A minimal architecture for joint action	NEURAL NETWORKS	138	0.5	1	5.785		1	0	0
10.1016/j.imavis.2012.01.001	Extended local binary patterns for texture classification	IMAGE AND VISION COMPUTING	138	0.5	2	2.733		0	0	0
10.1007/s10710-010-9112-3	Human-competitive results produced by genetic programming	GENETIC PROGRAMMING AND EVOLVABLE MACHINES	137	13.066	4	1.333		2	0	0
10.1016/j.eswa.2010.02.095	A fuzzy multicriteria methodology for selection among energy alternatives	EXPERT SYSTEMS WITH APPLICATIONS	137	3.05	4	4.292		4	0	0
10.1016/j.eswa.2013.08.044	Breast cancer diagnosis based on feature extraction using a hybrid of K-means and support vector machine algorithms	EXPERT SYSTEMS WITH APPLICATIONS	137	0.25	1	4.292		0	0	0
10.1016/j.dss.2011.11.002	Manipulation of online reviews: An analysis of ratings readability and sentiments	DECISION SUPPORT SYSTEMS	136	4	2	3.847		1	1	0
10.1016/j.neunet.2009.07.020	Time Domain Parameters as a feature for EEG-based Brain-Computer Interfaces	NEURAL NETWORKS	136	3	1	5.785		0	1	0
10.1016/j.cviu.2015.03.015	A survey on face detection in the wild: Past present and future	COMPUTER VISION AND IMAGE UNDERSTANDING	136	1.75	6	2.645		6	0	0
10.1007/s10514-007-9058-3	Avoiding the uncanny valley: robot appearance personality and consistency of behavior in an attention-seeking home scenario for a robot companion	AUTONOMOUS ROBOTS	135	8	2	3.634		0	0	2
10.1016/j.media.2009.07.001	A large-scale evaluation of automatic pulmonary nodule detection in chest CT using local image features and k-nearest-neighbour classification	MEDICAL IMAGE ANALYSIS	135	6	2	8.88		0	1	0
10.1007/s11263-012-0564-1	Efficiently Scaling up Crowdsourced Video Annotation A Set of Best Practices for High Quality Economical Video Labeling	INTERNATIONAL JOURNAL OF COMPUTER VISION	135	3	1	6.071		0	0	0
10.1016/j.datak.2009.10.003	Frameworks for entity matching: A comparison	DATA & KNOWLEDGE ENGINEERING	135	3	6	1.583		0	6	0
10.1016/j.imavis.2012.02.009	Visual SLAM: Why filter?	IMAGE AND VISION COMPUTING	135	1	1	2.733		1	0	0
10.1016/j.knosys.2014.05.005	Sentic patterns: Dependency-based rules for concept-level sentiment analysis	KNOWLEDGE-BASED SYSTEMS	134	3	2	5.101		0	2	0
10.1016/j.neucom.2015.07.085	Transition-Aware Human Activity Recognition Using Smartphones	NEUROCOMPUTING	134	0.75	2	4.072		2	0	0
10.1007/s11263-014-0788-3	Spiking Deep Convolutional Neural Networks for Energy-Efficient Object Recognition	INTERNATIONAL JOURNAL OF COMPUTER VISION	133	4	3	6.071		1	2	0
10.1007/s12559-009-9009-8	Hyperdimensional Computing: An Introduction to Computing in Distributed Representation with High-Dimensional Random Vectors	COGNITIVE COMPUTATION	133	3.5	35	4.287		1	34	0
10.1007/s10115-007-0094-2	Random walk with restart: fast solutions and applications	KNOWLEDGE AND INFORMATION SYSTEMS	133	3	2	2.397		0	2	0
10.1016/j.artint.2008.04.002	Combining answer set programming with description logics for the semantic Web	ARTIFICIAL INTELLIGENCE	132	4.05	5	4.483		5	0	0
10.1016/j.media.2010.05.005	Comparing and combining algorithms for computer-aided detection of pulmonary nodules in computed tomography scans: The ANODE09 study	MEDICAL IMAGE ANALYSIS	132	3	1	8.88		0	1	0
10.1016/j.eswa.2012.12.095	Consumer neuroscience: Assessing the brain response to marketing stimuli using electroencephalogram (EEG) and eye tracking	EXPERT SYSTEMS WITH APPLICATIONS	131	3.25	5	4.292		4	0	0
10.1016/j.eswa.2008.12.039	Supplier selection: A hybrid model using DEA decision tree and neural network	EXPERT SYSTEMS WITH APPLICATIONS	131	0.5	2	4.292		2	0	0
10.1016/j.artint.2012.06.007	An open-source toolkit for mining Wikipedia	ARTIFICIAL INTELLIGENCE	130	14.25	21	4.483		19	0	0
10.1016/j.patcog.2010.12.005	Age estimation using a hierarchical classifier based on global and local facial features	PATTERN RECOGNITION	130	6	2	5.898		0	2	0
10.1016/j.imavis.2014.04.002	Covariance descriptor based on bio-inspired features for person re-identification and face verification	IMAGE AND VISION COMPUTING	130	3	1	2.733		0	1	0
10.1016/j.patcog.2009.05.018	Real-time traffic sign recognition from video by class-specific discriminative features	PATTERN RECOGNITION	129	6	3	5.898		0	3	0
10.1016/j.eswa.2010.12.028	Applying neural network analysis on heart rate variability data to assess driver fatigue	EXPERT SYSTEMS WITH APPLICATIONS	129	3	1	4.292		0	1	0
10.1016/j.patcog.2008.08.035	MSLD: A robust descriptor for line matching	PATTERN RECOGNITION	129	3	1	5.898		0	1	0
10.1016/j.neunet.2012.11.014	Dynamic evolving spiking neural networks for on-line spatio- and spectro-temporal pattern recognition	NEURAL NETWORKS	129	1.6	3	5.785		3	0	0
10.1007/s00521-010-0362-z	A comparative survey of artificial intelligence applications in finance: artificial neural networks expert system and hybrid intelligent systems	NEURAL COMPUTING & APPLICATIONS	129	1	1	4.664		1	0	0
10.1016/j.eswa.2012.02.109	Evolutionary techniques in optimizing machining parameters: Review and recent applications (2007-2011)	EXPERT SYSTEMS WITH APPLICATIONS	129	0.25	1	4.292		0	0	0
10.1016/j.media.2013.12.002	Evaluation of prostate segmentation algorithms for MRI: The PROMISE12 challenge	MEDICAL IMAGE ANALYSIS	128	6	2	8.88		0	2	0
10.1016/j.neucom.2015.01.095	Fusing audio visual and textual clues for sentiment analysis from multimodal content	NEUROCOMPUTING	128	6	2	4.072		0	1	0
10.1016/j.eswa.2014.06.007	Intelligent tourism recommender systems: A survey	EXPERT SYSTEMS WITH APPLICATIONS	128	6	5	4.292		4	1	0
10.1016/j.aei.2010.06.003	A review and outlook for a 'Building Information Model' (BIM): A multi-standpoint framework for technological development	ADVANCED ENGINEERING INFORMATICS	128	3	1	3.772		0	1	0
10.1007/s11263-012-0550-7	Exploring the Trade-off Between Accuracy and Observational Latency in Action Recognition	INTERNATIONAL JOURNAL OF COMPUTER VISION	128	3	1	6.071		0	1	0
10.1007/s11263-016-0930-5	Weighted Nuclear Norm Minimization and Its Applications to Low Level Vision	INTERNATIONAL JOURNAL OF COMPUTER VISION	128	1.85	4	6.071		4	0	0
10.1016/j.inffus.2014.03.005	A framework for collaborative computing and multi-sensor data fusion in body sensor networks	INFORMATION FUSION	128	0.25	1	10.716		0	0	0
10.1016/j.asoc.2014.01.028	A novel hybrid KPCA and SVM with GA model for intrusion detection	APPLIED SOFT COMPUTING	128	0.25	1	4.873		0	0	0
10.1016/j.eswa.2011.09.076	A survey: Ant Colony Optimization based recent research and implementation on several engineering domain	EXPERT SYSTEMS WITH APPLICATIONS	128	0.25	1	4.292		0	0	0
10.1016/j.imavis.2017.01.010	Going deeper into action recognition: A survey	IMAGE AND VISION COMPUTING	128	0.25	1	2.733		1	0	0
10.1016/j.patrec.2011.04.021	A finger-vein verification system using mean curvature	PATTERN RECOGNITION LETTERS	127	6	2	2.81		0	2	0
10.1016/j.patcog.2010.07.013	Color image segmentation using histogram thresholding - Fuzzy C-means hybrid approach	PATTERN RECOGNITION	127	3	1	5.898		0	1	0
10.1007/s10846-010-9490-z	Fusion of IMU and Vision for Absolute Scale Estimation in Monocular SLAM	JOURNAL OF INTELLIGENT & ROBOTIC SYSTEMS	127	3	1	2.02		0	1	0
10.1016/j.media.2013.01.001	Regression forests for efficient anatomy detection and localization in computed tomography scans	MEDICAL IMAGE ANALYSIS	127	3	2	8.88		0	2	0
10.1016/j.eswa.2006.12.025	A recommender system using GA K-means clustering in an online shopping market	EXPERT SYSTEMS WITH APPLICATIONS	127	0.5	1	4.292		0	0	0
10.1016/j.imavis.2008.11.006	Generic and real-time structure from motion using local bundle adjustment	IMAGE AND VISION COMPUTING	126	10	8	2.733		1	7	0
10.1007/s10994-010-5198-3	Large scale image annotation: learning to rank with joint word-image embeddings	MACHINE LEARNING	126	7	8	2.809		1	7	0
10.1016/j.neucom.2007.10.013	Evolving artificial neural networks using an improved PSO and DPSO	NEUROCOMPUTING	126	3	1	4.072		0	1	0
10.1016/j.dss.2008.09.004	Improving supply chain performance management: A systematic approach to analyzing iterative KPI accomplishment	DECISION SUPPORT SYSTEMS	126	3	1	3.847		0	0	0
10.1016/j.eswa.2009.02.014	Pitch angle control in wind turbines above the rated wind speed by multi-layer perceptron and radial basis function neural networks	EXPERT SYSTEMS WITH APPLICATIONS	126	3	1	4.292		0	1	0
10.1016/j.patrec.2012.09.019	Scene text detection using graph model built upon maximally stable extremal regions	PATTERN RECOGNITION LETTERS	126	3	1	2.81		0	0	0
10.1016/j.artmed.2008.07.017	The coming of age of artificial intelligence in medicine	ARTIFICIAL INTELLIGENCE IN MEDICINE	125	28	8	3.574		5	0	3
10.1007/s11263-008-0136-6	Particle video: Long-range motion estimation using point trajectories	INTERNATIONAL JOURNAL OF COMPUTER VISION	125	3	2	6.071		0	2	0
10.1007/s10845-008-0158-5	RFID localization algorithms and applications-a review	JOURNAL OF INTELLIGENT MANUFACTURING	125	3	1	3.535		0	1	0
10.1016/j.eswa.2013.04.018	Predicting the determinants of the NFC-enabled mobile credit card acceptance: A neural networks approach	EXPERT SYSTEMS WITH APPLICATIONS	125	1	1	4.292		1	0	0
10.1007/s10994-012-5285-8	On label dependence and loss minimization in multi-label classification	MACHINE LEARNING	124	1	1	2.809		1	0	0
10.1016/j.patrec.2015.12.013	50 years of biometric research: Accomplishments challenges and opportunities	PATTERN RECOGNITION LETTERS	124	0.5	1	2.81		1	0	0
10.1016/j.neunet.2013.01.012	Change-point detection in time-series data by relative density-ratio estimation	NEURAL NETWORKS	123	8.95	11	5.785		10	1	0
10.1016/j.inffus.2006.10.002	Intrusion detection in computer networks by a modular ensemble of one-class classifiers	INFORMATION FUSION	123	6	2	10.716		0	1	0
10.1007/s11263-007-0085-5	Keypoint detection and local feature matching for textured 3D face recognition	INTERNATIONAL JOURNAL OF COMPUTER VISION	123	6	2	6.071		0	2	0
10.1016/j.eswa.2008.09.013	Effective diagnosis of heart disease through neural networks ensembles	EXPERT SYSTEMS WITH APPLICATIONS	123	3	1	4.292		0	1	0
10.1016/j.inffus.2007.01.004	Ontology-based situation awareness	INFORMATION FUSION	122	9.314	3	10.716		0	1	0
10.1016/j.cviu.2009.03.011	Video shot boundary detection: Seven years of TRECVid activity	COMPUTER VISION AND IMAGE UNDERSTANDING	122	9	6	2.645		0	6	0
10.1007/s10514-009-9160-9	HERB: a home exploring robotic butler	AUTONOMOUS ROBOTS	122	6	2	3.634		0	2	0
10.1016/j.dss.2012.12.022	Whose and what chatter matters? The effect of tweets on movie sales	DECISION SUPPORT SYSTEMS	122	3.2	4	3.847		4	0	0
10.1016/j.artint.2013.10.003	Algorithm runtime prediction: Methods & evaluation	ARTIFICIAL INTELLIGENCE	122	1.75	4	4.483		4	0	0
10.1016/j.eswa.2013.01.001	Ontology-based sentiment analysis of twitter posts	EXPERT SYSTEMS WITH APPLICATIONS	122	1.25	2	4.292		1	0	0
10.1016/j.asoc.2012.12.029	An energy aware fuzzy approach to unequal clustering in wireless sensor networks	APPLIED SOFT COMPUTING	122	0.5	2	4.873		0	0	0
10.1016/j.media.2009.08.003	Fast detection of the optic disc and fovea in color fundus photographs	MEDICAL IMAGE ANALYSIS	121	6	6	8.88		0	6	0
10.1007/s10817-014-9305-1	HermiT: An OWL 2 Reasoner	JOURNAL OF AUTOMATED REASONING	121	3	1	1.172		0	0	0
10.1016/j.inffus.2007.04.003	Medical image fusion using m-PCNN	INFORMATION FUSION	121	3	1	10.716		0	1	0
10.1016/j.patrec.2007.09.005	Multilevel thresholding for image segmentation through a fast statistical recursive algorithm	PATTERN RECOGNITION LETTERS	121	3	1	2.81		0	1	0
10.1016/j.eswa.2007.11.017	Cross-correlation aided support vector machine classifier for classification of EEG signals	EXPERT SYSTEMS WITH APPLICATIONS	121	1	1	4.292		1	0	0
10.1002/widm.1134	Big Data with Cloud Computing: an insight on the computing environment MapReduce and programming frameworks	WILEY INTERDISCIPLINARY REVIEWS-DATA MINING AND KNOWLEDGE DISCOVERY	121	0.5	1	2.541		1	0	0
10.1016/j.eswa.2011.04.163	Solving the traveling salesman problem based on the genetic simulated annealing ant colony system with particle swarm optimization techniques	EXPERT SYSTEMS WITH APPLICATIONS	121	0.5	4	4.292		4	0	0
10.1016/j.patcog.2007.06.012	A new calibration model of camera lens distortion	PATTERN RECOGNITION	120	9	3	5.898		0	2	0
10.1007/s13042-010-0001-0	Understanding bag-of-words model: a statistical framework	INTERNATIONAL JOURNAL OF MACHINE LEARNING AND CYBERNETICS	120	8	1	3.844		0	0	1
10.1007/s10994-012-5320-9	On evaluating stream learning algorithms	MACHINE LEARNING	120	1	1	2.809		1	0	0
10.1016/j.patcog.2011.03.029	PLBP: An effective local binary patterns texture descriptor with pyramid representation	PATTERN RECOGNITION	120	1	1	5.898		1	0	0
10.1016/j.eswa.2010.06.057	Application of fuzzy analytic network process for supplier selection in a manufacturing organisation	EXPERT SYSTEMS WITH APPLICATIONS	120	0.5	3	4.292		3	0	0
10.1016/j.dss.2014.03.001	A data-driven approach to predict the success of bank telemarketing	DECISION SUPPORT SYSTEMS	119	14.5	6	3.847		2	0	1
10.1007/s10994-010-5216-5	Editorial survey: swarm intelligence for data mining	MACHINE LEARNING	119	6.25	5	2.809		4	0	0
10.1016/j.patcog.2007.04.016	Combining minutiae descriptors for fingerprint matching	PATTERN RECOGNITION	119	6	2	5.898		0	2	0
10.1007/s10618-011-0238-6	Survey on mining subjective data on the web	DATA MINING AND KNOWLEDGE DISCOVERY	119	4	2	2.879		1	1	0
10.1016/j.patcog.2008.08.030	Choosing the kernel parameters for support vector machines by the inter-cluster distance in the feature space	PATTERN RECOGNITION	119	3	1	5.898		0	1	0
10.1016/j.patcog.2008.04.012	Image annotation via graph learning	PATTERN RECOGNITION	119	3	1	5.898		0	1	0
10.1016/j.patcog.2009.03.008	A comparative evaluation of interactive segmentation algorithms	PATTERN RECOGNITION	118	6	2	5.898		0	2	0
10.1016/j.media.2012.10.002	Non-local statistical label fusion for multi-atlas segmentation	MEDICAL IMAGE ANALYSIS	118	3.5	2	8.88		1	1	0
10.1016/j.patrec.2008.01.030	A self-training semi-supervised SVM algorithm and its application in an EEG-based brain computer interface speller system	PATTERN RECOGNITION LETTERS	118	3	1	2.81		0	1	0
10.1177/1059712309343819	Defining Agency: Individuality Normativity Asymmetry and Spatio-temporality in Action	ADAPTIVE BEHAVIOR	118	0.75	3	1.362		3	0	0
10.1016/j.patcog.2012.04.003	Discriminative features for texture description	PATTERN RECOGNITION	118	0.25	1	5.898		0	0	0
10.1016/j.patrec.2012.12.014	The Opportunity challenge: A benchmark database for on-body sensor-based activity recognition	PATTERN RECOGNITION LETTERS	118	0	1	2.81		0	0	0
10.1016/j.media.2013.04.003	Optical techniques for 3D surface reconstruction in computer-assisted laparoscopic surgery	MEDICAL IMAGE ANALYSIS	117	9	8	8.88		0	8	0
10.1016/j.patrec.2008.01.013	A fast accumulative motion orientation model based on integral image for video smoke detection	PATTERN RECOGNITION LETTERS	117	3	2	2.81		0	2	0
10.1007/s11263-011-0474-7	Energy-Based Geometric Multi-model Fitting	INTERNATIONAL JOURNAL OF COMPUTER VISION	117	3	1	6.071		0	0	0
10.1016/j.csl.2009.02.006	Monaural speech separation and recognition challenge	COMPUTER SPEECH AND LANGUAGE	117	3	1	1.857		0	1	0
10.1016/j.patcog.2009.04.003	Splitting touching cells based on concave points and ellipse fitting	PATTERN RECOGNITION	117	3	1	5.898		0	1	0
10.1016/j.aei.2011.07.009	Design explorations of performance driven geometry in architectural design using parametric modeling and genetic algorithms	ADVANCED ENGINEERING INFORMATICS	117	1.25	2	3.772		1	0	0
10.1016/j.patrec.2011.08.019	Exponentially weighted moving average charts for detecting concept drift	PATTERN RECOGNITION LETTERS	117	1.25	2	2.81		2	0	0
10.1016/j.dss.2013.08.008	Understanding the paradigm shift to computational social science in the presence of big data	DECISION SUPPORT SYSTEMS	116	10.85	13	3.847		12	0	0
10.1007/s11263-008-0191-z	Geodesic Matting: A Framework for Fast Interactive Image and Video Segmentation and Matting	INTERNATIONAL JOURNAL OF COMPUTER VISION	116	9	9	6.071		0	9	0
10.1016/j.datak.2009.06.008	A semantic similarity metric combining features and intrinsic information content	DATA & KNOWLEDGE ENGINEERING	116	3	2	1.583		0	2	0
10.1016/j.eswa.2008.05.031	Design and simulation of self-tuning PID-type fuzzy adaptive control for an expert HVAC system	EXPERT SYSTEMS WITH APPLICATIONS	116	3	1	4.292		0	1	0
10.1016/j.datak.2007.06.009	Isolated items discarding strategy for discovering high utility itemsets	DATA & KNOWLEDGE ENGINEERING	116	3	1	1.583		0	1	0
10.1016/j.neucom.2016.09.010	Convolutional neural networks for hyperspectral image classification	NEUROCOMPUTING	116	1	1	4.072		0	0	0
10.1016/j.dss.2012.08.017	Towards business intelligence systems success: Effects of maturity and culture on analytical decision making	DECISION SUPPORT SYSTEMS	116	0.25	1	3.847		0	0	0
10.1016/j.eswa.2015.06.025	CloudID: Trustworthy cloud-based and cross-enterprise biometric identification	EXPERT SYSTEMS WITH APPLICATIONS	115	12	4	4.292		0	0	0
10.1016/j.patrec.2010.04.004	Locality sensitive hashing: A comparison of hash function types and querying mechanisms	PATTERN RECOGNITION LETTERS	115	12	6	2.81		0	5	0
10.1016/j.dss.2007.04.008	Intelligent environment for monitoring Alzheimer patients agent technology for health care	DECISION SUPPORT SYSTEMS	115	6	6	3.847		0	6	0
10.1016/j.patcog.2008.08.023	Image encryption by multiple random grids	PATTERN RECOGNITION	115	3	1	5.898		0	1	0
10.1007/s11263-011-0422-6	Optic Flow in Harmony	INTERNATIONAL JOURNAL OF COMPUTER VISION	115	3	1	6.071		0	1	0
10.1016/j.cviu.2015.02.008	Optical flow modeling and computation: A survey	COMPUTER VISION AND IMAGE UNDERSTANDING	115	2.5	3	2.645		2	0	0
10.1007/s11263-012-0524-9	2D Articulated Human Pose Estimation and Retrieval in (Almost) Unconstrained Still Images	INTERNATIONAL JOURNAL OF COMPUTER VISION	115	1	1	6.071		1	0	0
10.1016/j.eswa.2011.07.032	An efficient intrusion detection system based on support vector machines and gradually feature removal method	EXPERT SYSTEMS WITH APPLICATIONS	115	0.25	1	4.292		0	0	0
10.1016/j.artint.2011.03.007	Monte-Carlo tree search and rapid action value estimation in computer Go	ARTIFICIAL INTELLIGENCE	114	52	7	4.483		0	1	6
10.1016/j.neunet.2014.01.006	NeuCube: A spiking neural network architecture for mapping learning and understanding of spatio-temporal brain data	NEURAL NETWORKS	114	3.6	7	5.785		7	0	0
10.1016/j.patcog.2009.08.016	Comparison and combination of iris matchers for reliable personal authentication	PATTERN RECOGNITION	114	3	4	5.898		0	4	0
10.1007/s11263-009-0243-z	Entropy Minimization for Shadow Removal	INTERNATIONAL JOURNAL OF COMPUTER VISION	114	3	1	6.071		0	1	0
10.1007/s10462-011-9272-4	Decision trees: a recent overview	ARTIFICIAL INTELLIGENCE REVIEW	114	1.85	3	5.095		3	0	0
10.1007/s10462-012-9342-2	Artificial fish swarm algorithm: a survey of the state-of-the-art hybridization combinatorial and indicative applications	ARTIFICIAL INTELLIGENCE REVIEW	114	0.5	2	5.095		2	0	0
10.1016/j.eswa.2008.09.002	Context-aware system for proactive personalized service based on context history	EXPERT SYSTEMS WITH APPLICATIONS	113	9	9	4.292		0	9	0
10.1016/j.cviu.2013.02.005	A performance evaluation of gradient field HOG descriptor for sketch based image retrieval	COMPUTER VISION AND IMAGE UNDERSTANDING	113	3	2	2.645		0	2	0
10.1016/j.artint.2008.10.012	Deterministic planning in the fifth international planning competition: PDDL3 and experimental evaluation of the planners	ARTIFICIAL INTELLIGENCE	113	3	2	4.483		0	2	0
10.1016/j.csl.2012.10.004	The PASCAL CHiME speech separation and recognition challenge	COMPUTER SPEECH AND LANGUAGE	113	3	1	1.857		0	1	0
10.1016/j.neunet.2016.05.003	Synchronization of fractional-order complex-valued neural networks with time delay	NEURAL NETWORKS	113	0.5	1	5.785		1	0	0
10.1016/j.knosys.2014.07.007	Web data extraction applications and techniques: A survey	KNOWLEDGE-BASED SYSTEMS	112	52.6	78	5.101		77	0	0
10.1007/s10462-009-9109-6	A survey of learning-based techniques of email spam filtering	ARTIFICIAL INTELLIGENCE REVIEW	112	3	2	5.095		0	2	0
10.1016/j.eswa.2008.04.003	Classifying the segmentation of customer value via RFM model and RS theory	EXPERT SYSTEMS WITH APPLICATIONS	112	3	1	4.292		0	1	0
10.1016/j.neunet.2009.08.007	Clustering: A neural network approach	NEURAL NETWORKS	111	5.25	4	5.785		1	1	0
10.1007/s10462-011-9277-z	Computational trust and reputation models for open multi-agent systems: a review	ARTIFICIAL INTELLIGENCE REVIEW	111	3	1	5.095		0	1	0
10.1016/j.datak.2007.08.001	Text document clustering based on frequent word meaning sequences	DATA & KNOWLEDGE ENGINEERING	111	3	2	1.583		0	2	0
10.1016/j.eswa.2007.12.020	The comparisons of data mining techniques for the predictive accuracy of probability of default of credit card clients	EXPERT SYSTEMS WITH APPLICATIONS	111	3	1	4.292		0	0	0
10.1016/j.knosys.2012.06.005	A novel probabilistic feature selection method for text classification	KNOWLEDGE-BASED SYSTEMS	111	0.5	2	5.101		0	0	0
10.1016/j.neucom.2008.04.016	Image denoising in the wavelet domain using a new adaptive thresholding function	NEUROCOMPUTING	111	0.25	1	4.072		0	0	0
10.1016/j.aei.2011.12.002	ONTO-PDM: Product-driven ONTOlogy for Product Data Management interoperability within manufacturing process environment	ADVANCED ENGINEERING INFORMATICS	111	0.25	1	3.772		1	0	0
10.1016/j.patcog.2011.08.012	Minkowski metric feature weighting and anomalous cluster initializing in K-Means clustering	PATTERN RECOGNITION	110	8.5	4	5.898		0	2	0
10.1007/s10994-011-5272-5	Statistical topic models for multi-label document classification	MACHINE LEARNING	110	6	2	2.809		0	2	0
10.1016/j.eswa.2007.06.026	An adaptive neuro-fuzzy inference system for bridge risk assessment	EXPERT SYSTEMS WITH APPLICATIONS	110	3	1	4.292		0	0	0
10.1016/j.eswa.2007.01.040	DDoS attack detection method using cluster analysis	EXPERT SYSTEMS WITH APPLICATIONS	110	3	1	4.292		0	1	0
10.1145/1961189.1961194	Social Network Analysis and Mining for Business Applications	ACM TRANSACTIONS ON INTELLIGENT SYSTEMS AND TECHNOLOGY	110	2.35	3	2.861		3	0	0
10.1016/j.dss.2014.08.005	Examining the influence of online reviews on consumers' decision-making: A heuristic-systematic model	DECISION SUPPORT SYSTEMS	110	1	1	3.847		1	0	0
10.1016/j.patrec.2008.10.003	Optimal multi-level thresholding using a two-stage Otsu optimization approach	PATTERN RECOGNITION LETTERS	109	6	2	2.81		0	1	0
10.1016/j.patcog.2009.11.018	Performance evaluation of score level fusion in multimodal biometric systems	PATTERN RECOGNITION	109	3	2	5.898		0	2	0
10.1016/j.neucom.2014.04.078	MRPR: A Map Reduce solution for prototype reduction in big data classification	NEUROCOMPUTING	109	2.35	4	4.072		4	0	0
10.1016/j.swevo.2013.12.001	Optimal size and siting of multiple distributed generators in distribution system using bacterial foraging optimization	SWARM AND EVOLUTIONARY COMPUTATION	109	0.25	1	6.33		0	0	0
10.1007/s10489-014-0629-7	Audio-visual speech recognition using deep learning	APPLIED INTELLIGENCE	108	10.2	25	2.882		24	1	0
10.1007/s10618-010-0190-x	Three naive Bayes approaches for discrimination-free classification	DATA MINING AND KNOWLEDGE DISCOVERY	108	9.5	2	2.879		1	0	1
10.1016/j.media.2016.06.037	Image analysis and machine learning in digital pathology: Challenges and opportunities	MEDICAL IMAGE ANALYSIS	108	7	12	8.88		8	0	0
10.1007/s11263-007-0099-z	Multiframe motion segmentation with missing data using PowerFactorization and GPCA	INTERNATIONAL JOURNAL OF COMPUTER VISION	108	3	7	6.071		0	7	0
10.1007/s11263-010-0357-3	Operator Splittings Bregman Methods and Frame Shrinkage in Image Processing	INTERNATIONAL JOURNAL OF COMPUTER VISION	108	3	2	6.071		0	2	0
10.1016/j.eswa.2012.07.066	Group multi-criteria decision making based upon interval-valued fuzzy numbers: An extension of the MULTIMOORA method	EXPERT SYSTEMS WITH APPLICATIONS	108	2.25	4	4.292		2	0	0
10.1016/j.neucom.2013.01.027	A PSO and pattern search based memetic algorithm for SVMs parameters optimization	NEUROCOMPUTING	108	1.25	5	4.072		3	0	0
10.1016/j.asoc.2015.01.068	A new hybrid method based on Particle Swarm Optimization Ant Colony Optimization and 3-Opt algorithms for Traveling Salesman Problem	APPLIED SOFT COMPUTING	108	1	1	4.873		1	0	0
10.1007/s10462-016-9490-x	A survey of decision making methods based on certain hybrid soft set models	ARTIFICIAL INTELLIGENCE REVIEW	108	1	3	5.095		3	0	0
10.1016/j.imavis.2008.12.008	On the security defects of an image encryption scheme	IMAGE AND VISION COMPUTING	108	0.5	2	2.733		2	0	0
10.1016/j.eswa.2010.12.156	Hybrid feature selection by combining filters and wrappers	EXPERT SYSTEMS WITH APPLICATIONS	108	0.25	1	4.292		0	0	0
10.1007/s11263-009-0277-2	A 3D Shape Retrieval Framework Supporting Multimodal Queries	INTERNATIONAL JOURNAL OF COMPUTER VISION	107	3	3	6.071		0	3	0
10.1016/j.eswa.2007.04.009	Incrementally fast updated frequent pattern trees	EXPERT SYSTEMS WITH APPLICATIONS	107	3	2	4.292		0	2	0
10.1016/j.asoc.2014.11.023	A systematic review of machine learning techniques for software fault prediction	APPLIED SOFT COMPUTING	107	1	1	4.873		1	0	0
10.1016/j.dss.2011.10.022	Assessing the effects of service quality and justice on customer satisfaction and the continuance intention of mobile value-added services: An empirical test of a multidimensional model	DECISION SUPPORT SYSTEMS	107	1	1	3.847		1	0	0
10.1016/j.media.2015.03.004	Super-resolved enhancing and edge deghosting (SEED) for spatiotemporally encoded single-shot MRI	MEDICAL IMAGE ANALYSIS	107	0.5	2	8.88		1	0	0
10.1016/j.media.2009.10.001	Adaptive local multi-atlas segmentation: Application to the heart and the caudate nucleus	MEDICAL IMAGE ANALYSIS	106	6	3	8.88		0	3	0
10.1016/j.media.2012.07.007	Deformable segmentation via sparse representation and dictionary learning	MEDICAL IMAGE ANALYSIS	106	3	3	8.88		0	3	0
10.1016/j.patrec.2011.09.042	Shape matching and classification using height functions	PATTERN RECOGNITION LETTERS	106	3	1	2.81		0	1	0
10.1007/s10514-012-9280-5	Stability of small-scale UAV helicopters and quadrotors with added payload mass under PID control	AUTONOMOUS ROBOTS	106	3	3	3.634		0	3	0
10.1007/s10514-009-9139-6	Vision-based control of near-obstacle flight	AUTONOMOUS ROBOTS	106	3	1	3.634		0	1	0
10.1016/j.dss.2012.10.047	Factors influencing online health information search: An empirical analysis of a national cancer-related survey	DECISION SUPPORT SYSTEMS	106	0.5	1	3.847		1	0	0
10.1016/j.aei.2015.01.001	State of research in automatic as-built modelling	ADVANCED ENGINEERING INFORMATICS	106	0.5	1	3.772		1	0	0
10.1007/s11263-010-0418-7	A Variational Framework for Exemplar-Based Image Inpainting	INTERNATIONAL JOURNAL OF COMPUTER VISION	105	3	10	6.071		0	10	0
10.1007/s11263-008-0200-2	Analysis of Rain and Snow in Frequency Space	INTERNATIONAL JOURNAL OF COMPUTER VISION	105	3	1	6.071		0	1	0
10.1016/j.bdr.2015.04.001	Efficient Machine Learning for Big Data: A Review	BIG DATA RESEARCH	105	0.75	2	2.952		2	0	0
10.1016/j.eij.2015.06.005	Recommendation systems: Principles methods and evaluation	EGYPTIAN INFORMATICS JOURNAL	104	40.796	7	2.306		2	0	4
10.1016/j.eswa.2016.04.018	Bio inspired computing - A review of algorithms and scope of applications	EXPERT SYSTEMS WITH APPLICATIONS	104	9.6	22	4.292		22	0	0
10.1007/s10846-010-9473-0	Automatic Take Off Tracking and Landing of a Miniature UAV on a Moving Carrier Vehicle	JOURNAL OF INTELLIGENT & ROBOTIC SYSTEMS	104	7.5	4	2.02		2	2	0
10.1007/s11263-009-0279-0	Contextual Part Analogies in 3D Objects	INTERNATIONAL JOURNAL OF COMPUTER VISION	104	3	1	6.071		0	1	0
10.1016/j.patcog.2010.03.016	Hand gesture recognition based on dynamic Bayesian network framework	PATTERN RECOGNITION	104	3	1	5.898		0	1	0
10.1007/s10044-008-0109-y	Optimizing two-pass connected-component labeling algorithms	PATTERN ANALYSIS AND APPLICATIONS	104	3	2	1.41		0	2	0
10.1016/j.dss.2012.05.044	Data information and analytics as services	DECISION SUPPORT SYSTEMS	104	1	1	3.847		1	0	0
10.1016/j.eswa.2010.09.067	Short term wind speed prediction based on evolutionary support vector regression algorithms	EXPERT SYSTEMS WITH APPLICATIONS	104	1	1	4.292		1	0	0
10.1016/j.dss.2012.12.032	Why people keep coming back to Facebook: Explaining and predicting continuance participation from an extended theory of planned behaviour perspective	DECISION SUPPORT SYSTEMS	104	1	2	3.847		2	0	0
10.1007/s11263-015-0872-3	Deep Filter Banks for Texture Recognition Description and Segmentation	INTERNATIONAL JOURNAL OF COMPUTER VISION	104	0.25	1	6.071		1	0	0
10.1016/j.swevo.2011.02.003	Optimal placement of multi-distributed generation units including different load models using particle swarm optimization	SWARM AND EVOLUTIONARY COMPUTATION	104	0.25	1	6.33		0	0	0
10.1016/j.imavis.2008.06.010	Touch-less palm print biometrics: Novel design and implementation	IMAGE AND VISION COMPUTING	103	6	3	2.733		0	3	0
10.1016/j.patrec.2008.03.017	Face recognition using HOG-EBGM	PATTERN RECOGNITION LETTERS	103	3	3	2.81		0	3	0
10.1007/s10618-013-0322-1	Classification of time series by shapelet transformation	DATA MINING AND KNOWLEDGE DISCOVERY	103	1	1	2.879		1	0	0
10.1016/j.media.2010.05.010	Non-local MRI upsampling	MEDICAL IMAGE ANALYSIS	103	0.5	1	8.88		1	0	0
10.1002/widm.1074	Frequent item set mining	WILEY INTERDISCIPLINARY REVIEWS-DATA MINING AND KNOWLEDGE DISCOVERY	102	7	1	2.541		0	0	1
10.1016/j.patcog.2010.06.007	Ensemble of local and global information for finger-knuckle-print recognition	PATTERN RECOGNITION	102	6	2	5.898		0	2	0
10.1016/j.media.2013.05.004	Joint segmentation of anatomical and functional images: Applications in quantification of lesions from PET PET-CT MRI-PET and MRI-PET-CT images	MEDICAL IMAGE ANALYSIS	102	5.104	1	8.88		0	0	0
10.1007/s11263-009-0232-2	Accurate Camera Calibration from Multi-View Stereo and Bundle Adjustment	INTERNATIONAL JOURNAL OF COMPUTER VISION	102	3	3	6.071		0	3	0
10.1016/j.media.2010.11.003	MR to ultrasound registration for image-guided prostate interventions	MEDICAL IMAGE ANALYSIS	102	3	1	8.88		0	1	0
10.1016/j.inffus.2014.10.004	Multi-focus image fusion using dictionary-based sparse representation	INFORMATION FUSION	102	3	1	10.716		0	1	0
10.1049/iet-cvi.2009.0075	Robust mean-shift tracking with corrected background-weighted histogram	IET COMPUTER VISION	102	3	1	1.648		0	1	0
10.1007/s11263-011-0441-3	1-Point-RANSAC Structure from Motion for Vehicle-Mounted Cameras by Exploiting Non-holonomic Constraints	INTERNATIONAL JOURNAL OF COMPUTER VISION	101	3	2	6.071		0	2	0
10.1016/j.asoc.2014.08.024	A survey on the Imperialist Competitive Algorithm metaheuristic: Implementation in engineering domain and directions for future research	APPLIED SOFT COMPUTING	101	3	2	4.873		0	0	0
10.1016/j.patcog.2009.02.005	Handwritten word-spotting using hidden Markov models and universal vocabularies	PATTERN RECOGNITION	101	3	3	5.898		0	3	0
10.1016/j.neucom.2008.12.017	Quality assessment of dimensionality reduction: Rank-based criteria	NEUROCOMPUTING	101	1	1	4.072		1	0	0
10.1016/j.dss.2010.12.003	An empirical evaluation of the comprehensibility of decision table tree and rule based predictive models	DECISION SUPPORT SYSTEMS	101	0.25	1	3.847		0	0	0
10.1016/j.eswa.2009.02.038	Using support vector machine with a hybrid feature selection method to the stock trend prediction	EXPERT SYSTEMS WITH APPLICATIONS	101	0.25	1	4.292		0	0	0
10.1016/j.neunet.2016.06.001	Extreme learning machine and adaptive sparse representation for image classification	NEURAL NETWORKS	100	0.5	1	5.785		1	0	0
10.1016/j.dss.2011.10.006	Understanding sustained participation in transactional virtual communities	DECISION SUPPORT SYSTEMS	99	4	5	3.847		4	0	0
10.1016/j.aei.2010.09.003	Comparative evaluation of Received Signal-Strength Index (RSSI) based indoor localization techniques for construction jobsites	ADVANCED ENGINEERING INFORMATICS	99	3	25	3.772		0	25	0
10.1016/j.patcog.2011.12.013	AdOtsu: An adaptive and parameterless generalization of Otsu's method for document image binarization	PATTERN RECOGNITION	99	1	1	5.898		1	0	0
10.1016/j.dss.2013.07.009	Ratings lead you to the product reviews help you clinch it? The mediating role of online review sentiments on product sales	DECISION SUPPORT SYSTEMS	99	0.5	1	3.847		1	0	0
10.1016/j.media.2010.10.001	Statistical modeling and recognition of surgical workflow	MEDICAL IMAGE ANALYSIS	98	6	2	8.88		0	2	0
10.1016/j.eswa.2013.02.007	Student modeling approaches: A literature review for the last decade	EXPERT SYSTEMS WITH APPLICATIONS	98	5.008	1	4.292		0	0	0
10.1016/j.cviu.2010.03.012	A fast stereo matching algorithm suitable for embedded real-time systems	COMPUTER VISION AND IMAGE UNDERSTANDING	98	3	2	2.645		0	2	0
10.1016/j.eswa.2010.08.023	Building comprehensible customer churn prediction models with advanced rule induction techniques	EXPERT SYSTEMS WITH APPLICATIONS	98	3	1	4.292		0	1	0
10.1016/j.patcog.2007.07.019	Extensions of vector quantization for incremental clustering	PATTERN RECOGNITION	98	3	1	5.898		0	1	0
10.1016/j.websem.2010.11.003	Semantically enhanced Information Retrieval: An ontology-based approach	JOURNAL OF WEB SEMANTICS	98	2.35	4	2.429		4	0	0
10.1016/j.bdr.2015.01.003	Geospatial Big Data: Challenges and Opportunities	BIG DATA RESEARCH	97	20.65	35	2.952		35	0	0
10.1016/j.media.2013.01.003	A blind deconvolution approach to recover effective connectivity brain networks from resting state fMRI data	MEDICAL IMAGE ANALYSIS	97	10.65	30	8.88		30	0	0
10.1016/j.imavis.2011.12.001	Human skeleton tracking from depth data using geodesic distances and optical flow	IMAGE AND VISION COMPUTING	97	6	3	2.733		0	3	0
10.1007/s10994-010-5221-8	Dual coordinate descent methods for logistic regression and maximum entropy models	MACHINE LEARNING	97	3	2	2.809		0	0	0
10.1016/j.patcog.2008.03.023	Efficient generation of simple polygons for characterizing the shape of a set of points in the plane	PATTERN RECOGNITION	97	3	1	5.898		0	1	0
10.1016/j.patcog.2012.05.006	Unsupervised segmentation and classification of cervical cell images	PATTERN RECOGNITION	97	3	2	5.898		0	2	0
10.1016/j.swevo.2012.02.003	A combined approach for clustering based on K-means and gravitational search algorithms	SWARM AND EVOLUTIONARY COMPUTATION	97	1.85	3	6.33		3	0	0
10.1145/2168752.2168754	Machine Recognition of Music Emotion: A Review	ACM TRANSACTIONS ON INTELLIGENT SYSTEMS AND TECHNOLOGY	97	1	1	2.861		1	0	0
10.1016/j.media.2014.10.012	Medical image segmentation on GPUs - A comprehensive review	MEDICAL IMAGE ANALYSIS	96	13.55	20	8.88		19	0	0
10.1016/j.cviu.2009.06.008	Automated handwashing assistance for persons with dementia using video and a partially observable Markov decision process	COMPUTER VISION AND IMAGE UNDERSTANDING	96	9	4	2.645		0	1	0
10.1016/j.artint.2010.05.005	Automatically generating personalized user interfaces with SUPPLE	ARTIFICIAL INTELLIGENCE	96	6	2	4.483		0	1	0
10.1016/j.eswa.2009.01.020	A review of ant algorithms	EXPERT SYSTEMS WITH APPLICATIONS	96	3	1	4.292		0	0	0
10.1016/j.imavis.2008.05.004	A robust Graph Transformation Matching for non-rigid registration	IMAGE AND VISION COMPUTING	96	3	2	2.733		0	2	0
10.1007/s11263-008-0141-9	Large deformation diffeomorphic metric curve mapping	INTERNATIONAL JOURNAL OF COMPUTER VISION	96	3	1	6.071		0	0	0
10.1007/s11263-010-0331-0	Tubular Structure Segmentation Based on Minimal Path Method and Anisotropic Enhancement	INTERNATIONAL JOURNAL OF COMPUTER VISION	96	3	1	6.071		0	1	0
10.1016/j.dss.2012.10.005	ADDIS: A decision support system for evidence-based medicine	DECISION SUPPORT SYSTEMS	96	2	4	3.847		4	0	0
10.1016/j.neucom.2011.12.006	Fully affine invariant SURF for image matching	NEUROCOMPUTING	96	1.35	2	4.072		2	0	0
10.1016/j.eswa.2014.07.012	Social network-based service recommendation with trust enhancement	EXPERT SYSTEMS WITH APPLICATIONS	96	1.35	2	4.292		2	0	0
10.1016/j.eswa.2011.11.107	Senti-lexicon and improved Naive Bayes algorithms for sentiment analysis of restaurant reviews	EXPERT SYSTEMS WITH APPLICATIONS	96	1	1	4.292		1	0	0
10.1007/s10618-016-0483-9	The great time series classification bake off: a review and experimental evaluation of recent algorithmic advances	DATA MINING AND KNOWLEDGE DISCOVERY	95	8.55	11	2.879		11	0	0
10.1016/j.ijar.2010.04.001	Combining content-based and collaborative recommendations: A hybrid approach based on Bayesian networks	INTERNATIONAL JOURNAL OF APPROXIMATE REASONING	95	7	3	1.982		1	2	0
10.1016/j.eswa.2008.07.019	An adaptive neuro-fuzzy inference system (ANFIS) model for wire-EDM	EXPERT SYSTEMS WITH APPLICATIONS	95	6	2	4.292		0	2	0
10.1016/j.eswa.2012.03.005	A review on vision techniques applied to Human Behaviour Analysis for Ambient-Assisted Living	EXPERT SYSTEMS WITH APPLICATIONS	95	4.75	4	4.292		1	1	0
10.1007/s10845-009-0356-9	An artificial neural network method for remaining useful life prediction of equipment subject to condition monitoring	JOURNAL OF INTELLIGENT MANUFACTURING	95	3	1	3.535		0	1	0
10.1016/j.neucom.2008.09.014	Localized support vector regression for time series prediction	NEUROCOMPUTING	95	3	2	4.072		0	2	0
10.1016/j.media.2012.07.004	Reconstruction of fetal brain MRI with intensity matching and complete outlier removal	MEDICAL IMAGE ANALYSIS	95	3	1	8.88		0	1	0
10.1016/j.patcog.2008.08.007	Thermography based breast cancer analysis using statistical features and fuzzy classification	PATTERN RECOGNITION	95	3	3	5.898		0	3	0
10.1007/s10618-009-0150-5	Extracting influential nodes on a social network for information diffusion	DATA MINING AND KNOWLEDGE DISCOVERY	95	0.5	1	2.879		1	0	0
10.1016/j.bdr.2015.03.003	Big Data Analytics for Dynamic Energy Management in Smart Grids	BIG DATA RESEARCH	95	0.25	2	2.952		2	0	0
10.1002/widm.1	Applications of tensor (multiway array) factorizations and decompositions in data mining	WILEY INTERDISCIPLINARY REVIEWS-DATA MINING AND KNOWLEDGE DISCOVERY	94	14	4	2.541		1	1	1
10.1016/j.artmed.2008.11.007	Matching incomplete time series with dynamic time warping: an algorithm and an application to post-stroke rehabilitation	ARTIFICIAL INTELLIGENCE IN MEDICINE	94	3.5	3	3.574		2	1	0
10.1007/s00138-009-0195-x	A comparative evaluation of interest point detectors and local descriptors for visual SLAM	MACHINE VISION AND APPLICATIONS	94	3	2	1.788		0	2	0
10.1007/s10710-010-9113-2	Open issues in genetic programming	GENETIC PROGRAMMING AND EVOLVABLE MACHINES	94	2.85	4	1.333		4	0	0
10.1007/s10514-014-9402-3	Grasp quality measures: review and performance	AUTONOMOUS ROBOTS	94	0.5	1	3.634		1	0	0
10.1016/j.eswa.2016.06.030	Designing an integrated AHP based decision support system for supplier selection in automotive industry	EXPERT SYSTEMS WITH APPLICATIONS	94	0.25	1	4.292		0	0	0
10.1016/j.media.2009.12.003	Multiple hypothesis template tracking of small 3D vessel structures	MEDICAL IMAGE ANALYSIS	93	3	4	8.88		0	4	0
10.1007/s11263-008-0195-8	Nonlinear Mean Shift over Riemannian Manifolds	INTERNATIONAL JOURNAL OF COMPUTER VISION	93	3	1	6.071		0	1	0
10.1016/j.asoc.2010.08.003	Biometric personal authentication using keystroke dynamics: A review	APPLIED SOFT COMPUTING	92	9	3	4.873		0	2	0
10.1016/j.patrec.2013.08.017	Classification of MRI brain images using combined wavelet entropy based spider web plots and probabilistic neural network	PATTERN RECOGNITION LETTERS	92	3	1	2.81		0	0	0
10.1049/iet-bmt.2011.0009	Face spoofing detection from single images using texture and local shape analysis	IET BIOMETRICS	92	3	1	2.092		0	0	0
10.1007/s10618-010-0201-y	Learning model trees from evolving data streams	DATA MINING AND KNOWLEDGE DISCOVERY	92	3	1	2.879		0	0	0
10.1016/j.neunet.2016.04.012	Global exponential stability of impulsive complex-valued neural networks with both asynchronous time-varying and continuously distributed delays	NEURAL NETWORKS	92	0.5	1	5.785		1	0	0
10.1016/j.dss.2011.03.002	Why do people get phished? Testing individual differences in phishing vulnerability within an integrated information processing model	DECISION SUPPORT SYSTEMS	91	27.7	25	3.847		4	18	2
10.1137/120868281	Stable Image Reconstruction Using Total Variation Minimization	SIAM JOURNAL ON IMAGING SCIENCES	91	15.08	4	2.514		0	2	1
10.1007/s10618-015-0444-8	On the evaluation of unsupervised outlier detection: measures datasets and an empirical study	DATA MINING AND KNOWLEDGE DISCOVERY	91	5	7	2.879		3	0	0
10.1016/j.imavis.2009.02.013	Being bored? Recognising natural interest by extensive audiovisual integration for real-life application	IMAGE AND VISION COMPUTING	91	3	1	2.733		0	1	0
10.1016/j.dss.2012.03.001	Evaluating sentiment in financial news articles	DECISION SUPPORT SYSTEMS	91	3	1	3.847		0	1	0
10.1007/s11263-009-0221-5	Issues About Retinex Theory and Contrast Enhancement	INTERNATIONAL JOURNAL OF COMPUTER VISION	91	3	1	6.071		0	0	0
10.1016/j.eswa.2007.12.053	Ontology based personalized route planning system using a multi-criteria decision making approach	EXPERT SYSTEMS WITH APPLICATIONS	91	3	2	4.292		0	2	0
10.1007/s11263-012-0588-6	Structure-Sensitive Superpixels via Geodesic Distance	INTERNATIONAL JOURNAL OF COMPUTER VISION	91	3	1	6.071		0	1	0
10.1016/j.cviu.2010.08.002	Visual object-action recognition: Inferring object affordances from human demonstration	COMPUTER VISION AND IMAGE UNDERSTANDING	91	3	1	2.645		0	1	0
10.1007/s10618-011-0231-0	Community detection via heterogeneous interaction analysis	DATA MINING AND KNOWLEDGE DISCOVERY	91	2	2	2.879		2	0	0
10.1016/j.eswa.2012.05.072	Adaptive neuro fuzzy controller for adaptive compliant robotic gripper	EXPERT SYSTEMS WITH APPLICATIONS	91	0.5	8	4.292		0	0	0
10.1016/j.dss.2013.06.006	Improving RFID adoption in Taiwan's healthcare industry based on a DEMATEL technique with a hybrid MCDM model	DECISION SUPPORT SYSTEMS	91	0.5	1	3.847		1	0	0
10.1016/j.inffus.2009.05.001	Image fusion based on a new contourlet packet	INFORMATION FUSION	91	0.25	1	10.716		0	0	0
10.1016/j.asoc.2015.10.004	A novel stability-based adaptive inertia weight for particle swarm optimization	APPLIED SOFT COMPUTING	90	3	1	4.873		0	0	0
10.1016/j.dss.2007.10.002	Combining empirical experimentation and modeling techniques: A design research approach for personalized mobile advertising applications	DECISION SUPPORT SYSTEMS	90	3	3	3.847		0	3	0
10.1016/j.knosys.2011.09.006	Incremental Collaborative Filtering recommender based on Regularized Matrix Factorization	KNOWLEDGE-BASED SYSTEMS	90	3	1	5.101		0	1	0
10.1007/s10618-012-0300-z	Local outlier detection reconsidered: a generalized view on locality with applications to spatial video and network outlier detection	DATA MINING AND KNOWLEDGE DISCOVERY	90	3	3	2.879		0	0	0
10.1016/j.media.2011.08.003	Thoracic respiratory motion estimation from MRI using a statistical model and a 2-D image navigator	MEDICAL IMAGE ANALYSIS	90	3	1	8.88		0	1	0
10.1016/j.eswa.2012.02.111	Adaptive neuro-fuzzy estimation of conductive silicone rubber mechanical properties	EXPERT SYSTEMS WITH APPLICATIONS	90	1	1	4.292		1	0	0
10.1016/j.eswa.2013.09.023	A wrapper approach for feature selection and Optimum-Path Forest based on Bat Algorithm	EXPERT SYSTEMS WITH APPLICATIONS	90	0.25	1	4.292		0	0	0
10.1016/j.eswa.2009.05.032	Customer churn prediction by hybrid neural networks	EXPERT SYSTEMS WITH APPLICATIONS	90	0.25	1	4.292		0	0	0
10.1007/s12193-015-0195-2	EmoNets: Multimodal deep learning approaches for emotion recognition in video	JOURNAL ON MULTIMODAL USER INTERFACES	90	0.25	1	2.02		1	0	0
10.1016/j.artint.2009.11.010	From the Semantic Web to social machines: A research challenge for AI on the World Wide Web	ARTIFICIAL INTELLIGENCE	89	41.958	43	4.483		9	0	0
10.1016/j.patcog.2007.12.002	Cancellable biometrics and annotations on BioHash	PATTERN RECOGNITION	89	9	4	5.898		0	4	0
10.1007/s10514-012-9279-y	Trajectory design and control for aggressive formation flight with quadrotors	AUTONOMOUS ROBOTS	89	6	3	3.634		0	3	0
10.1016/j.artint.2012.02.002	Towards mobile intelligence: Learning from GPS history data for collaborative recommendation	ARTIFICIAL INTELLIGENCE	89	4.35	3	4.483		2	1	0
10.1016/j.eswa.2008.07.018	Knowledge discovery on RFM model using Bernoulli sequence	EXPERT SYSTEMS WITH APPLICATIONS	89	3.75	3	4.292		2	0	0
10.1016/j.neucom.2012.06.050	Dynamic neural network-based fault diagnosis of gas turbine engines	NEUROCOMPUTING	89	3	1	4.072		0	1	0
10.1016/j.knosys.2013.01.017	Identifying influential nodes in complex networks with community structure	KNOWLEDGE-BASED SYSTEMS	89	3	1	5.101		0	1	0
10.1016/j.patcog.2008.06.010	Image retrieval based on the texton co-occurrence matrix	PATTERN RECOGNITION	89	3	2	5.898		0	2	0
10.1007/s10994-010-5222-7	Sparse canonical correlation analysis	MACHINE LEARNING	89	3	1	2.809		0	1	0
10.1016/j.dss.2009.02.013	The ties that bind: Social network principles in online communities	DECISION SUPPORT SYSTEMS	89	3	2	3.847		0	2	0
10.1016/j.media.2017.05.001	3D deeply supervised network for automated segmentation of volumetric medical images	MEDICAL IMAGE ANALYSIS	89	1	1	8.88		1	0	0
10.1016/j.aei.2012.02.002	Knowledge based engineering: Between AI and CAD. Review of a language based technology to support engineering design	ADVANCED ENGINEERING INFORMATICS	89	0.5	1	3.772		1	0	0
10.1016/j.dss.2012.04.005	Vehicle defect discovery from social media	DECISION SUPPORT SYSTEMS	89	0.5	1	3.847		1	0	0
10.1016/j.media.2015.10.008	A novel relational regularization feature selection method for joint regression and classification in AD diagnosis	MEDICAL IMAGE ANALYSIS	88	7	1	8.88		0	0	1
10.1016/j.asoc.2009.06.010	A perturbed particle swarm algorithm for numerical optimization	APPLIED SOFT COMPUTING	88	3.25	2	4.873		0	0	0
10.1016/j.neucom.2013.09.055	Autoencoder for words	NEUROCOMPUTING	88	3	2	4.072		0	0	0
10.1016/j.eswa.2007.09.046	Designing a knowledge-based system for strategic planning: A balanced scorecard perspective	EXPERT SYSTEMS WITH APPLICATIONS	88	3	3	4.292		0	3	0
10.1016/j.neunet.2009.05.009	Hemodynamic brain-computer interfaces for communication and rehabilitation	NEURAL NETWORKS	88	3	1	5.785		0	1	0
10.1016/j.patcog.2008.12.016	Text line and word segmentation of handwritten documents	PATTERN RECOGNITION	88	3	2	5.898		0	2	0
10.1016/j.eswa.2016.02.006	Computational Intelligence and Financial Markets: A Survey and Future Directions	EXPERT SYSTEMS WITH APPLICATIONS	88	2.25	4	4.292		4	0	0
10.1016/j.neunet.2016.09.002	Pinning-controlled synchronization of delayed neural networks with distributed-delay coupling via impulsive control	NEURAL NETWORKS	88	1.5	2	5.785		2	0	0
10.1016/j.eswa.2016.08.064	A state-of the-art survey & testbed of fuzzy AHP (FAHP) applications	EXPERT SYSTEMS WITH APPLICATIONS	88	1	1	4.292		1	0	0
10.1016/j.eswa.2010.12.012	APROMORE: An advanced process model repository	EXPERT SYSTEMS WITH APPLICATIONS	88	0.25	1	4.292		0	0	0
10.1016/j.eswa.2008.08.068	Design concept evaluation in product development using rough sets and grey relation analysis	EXPERT SYSTEMS WITH APPLICATIONS	88	0.25	1	4.292		0	0	0
10.1016/j.patcog.2016.11.008	Explaining nonlinear classification decisions with deep Taylor decomposition	PATTERN RECOGNITION	87	33.2	33	5.898		29	0	1
10.1016/j.media.2007.12.006	Instantiation and registration of statistical shape models of the femur and pelvis using 3D ultrasound imaging	MEDICAL IMAGE ANALYSIS	87	6	3	8.88		0	3	0
10.1016/j.aei.2007.08.012	Generation of energy-efficient architecture solutions applying GENE_ARCH: An evolution-based generative design system	ADVANCED ENGINEERING INFORMATICS	87	3	1	3.772		0	0	0
10.1016/j.eswa.2007.12.069	Optimal tunning of lead-lag and fuzzy logic power system stabilizers using particle swarm optimization	EXPERT SYSTEMS WITH APPLICATIONS	87	3	2	4.292		0	2	0
10.1016/j.swevo.2011.06.004	Energy-aware evolutionary routing protocol for dynamic clustering of wireless sensor networks	SWARM AND EVOLUTIONARY COMPUTATION	87	2.35	3	6.33		3	0	0
10.1016/j.knosys.2013.10.012	Multiple-output support vector regression with a firefly algorithm for interval-valued stock price index forecasting	KNOWLEDGE-BASED SYSTEMS	87	1.5	4	5.101		4	0	0
10.1016/j.eswa.2007.06.031	A time-based approach to effective recommender systems using implicit feedback	EXPERT SYSTEMS WITH APPLICATIONS	87	1	1	4.292		0	0	0
10.1049/iet-bmt.2011.0003	Ear biometrics: a survey of detection feature extraction and recognition methods	IET BIOMETRICS	87	1	2	2.092		2	0	0
10.1016/j.cviu.2008.09.003	Manifold models for signals and images	COMPUTER VISION AND IMAGE UNDERSTANDING	87	1	1	2.645		1	0	0
10.1016/j.asoc.2013.01.007	Particle Swarm Optimization for the Vehicle Routing Problem with Stochastic Demands	APPLIED SOFT COMPUTING	87	0.5	1	4.873		1	0	0
10.1016/j.eswa.2013.04.023	Assessing sentence scoring techniques for extractive text summarization	EXPERT SYSTEMS WITH APPLICATIONS	87	0.25	1	4.292		0	0	0
10.1007/s10845-008-0121-5	RFID-enabled real-time Wireless Manufacturing for adaptive assembly planning and control	JOURNAL OF INTELLIGENT MANUFACTURING	86	3	3	3.535		0	3	0
10.1016/j.neucom.2008.06.011	A density-based method for adaptive LDA model selection	NEUROCOMPUTING	86	2.5	1	4.072		0	0	0
10.1007/s10994-009-5106-x	Search-based structured prediction	MACHINE LEARNING	86	1	2	2.809		2	0	0
10.1016/j.neunet.2009.07.023	Cortical circuits for perceptual inference	NEURAL NETWORKS	86	0.5	1	5.785		1	0	0
10.1016/j.csl.2012.01.008	Automatic speaker age and gender recognition using acoustic and prosodic level information fusion	COMPUTER SPEECH AND LANGUAGE	85	3	1	1.857		0	1	0
10.1007/s10514-013-9341-4	Centroidal dynamics of a humanoid robot	AUTONOMOUS ROBOTS	85	3	4	3.634		0	4	0
10.1007/s10846-012-9723-4	Modeling and Control of MM-UAV: Mobile Manipulating Unmanned Aerial Vehicle	JOURNAL OF INTELLIGENT & ROBOTIC SYSTEMS	85	3	1	2.02		0	1	0
10.1007/s10846-008-9257-y	Vision-Based Odometry and SLAM for Medium and High Altitude Flying UAVs	JOURNAL OF INTELLIGENT & ROBOTIC SYSTEMS	85	3	1	2.02		0	1	0
10.1016/j.neunet.2009.05.004	Nonlinear modeling of neural population dynamics for hippocampal prostheses	NEURAL NETWORKS	85	2	2	5.785		2	0	0
10.1016/j.media.2016.07.009	ISLES 2015-A public evaluation benchmark for ischemic stroke lesion segmentation from multispectral MRI	MEDICAL IMAGE ANALYSIS	85	1.25	2	8.88		2	0	0
10.1016/j.eswa.2011.09.073	A new hybrid ant colony optimization algorithm for feature selection	EXPERT SYSTEMS WITH APPLICATIONS	85	1	1	4.292		1	0	0
10.1016/j.patrec.2008.06.018	Cross-validation and bootstrapping are unreliable in small sample classification	PATTERN RECOGNITION LETTERS	85	1	1	2.81		1	0	0
10.1016/j.patcog.2016.02.013	Feature selection in mixed data: A method using a novel fuzzy rough set-based information entropy	PATTERN RECOGNITION	85	1	1	5.898		1	0	0
10.1016/j.asoc.2009.10.019	Enhancement of Self-adaptive real-coded genetic algorithm using Taguchi method for Economic dispatch problem	APPLIED SOFT COMPUTING	85	0.25	8	4.873		8	0	0
10.1016/j.dss.2008.11.003	Examining the success factors for mobile work in healthcare: A deductive study	DECISION SUPPORT SYSTEMS	85	0.25	2	3.847		0	0	0
10.1016/j.eswa.2010.10.041	Feature selection and parameter optimization for support vector machines: A new approach based on genetic algorithm with feature chromosomes	EXPERT SYSTEMS WITH APPLICATIONS	85	0.25	4	4.292		4	0	0
10.1016/j.artint.2012.04.005	Evaluating Entity Linking with Wikipedia	ARTIFICIAL INTELLIGENCE	84	6	2	4.483		0	1	0
10.1016/j.eswa.2013.12.031	Fight sample degeneracy and impoverishment in particle filters: A review of intelligent approaches	EXPERT SYSTEMS WITH APPLICATIONS	84	3.75	8	4.292		7	0	0
10.1016/j.eswa.2007.02.008	A group recommendation system with consideration of interactions among group members	EXPERT SYSTEMS WITH APPLICATIONS	84	3	1	4.292		0	1	0
10.1016/j.media.2010.04.005	A non-local approach for image super-resolution using intermodality priors	MEDICAL IMAGE ANALYSIS	84	3	1	8.88		0	1	0
10.1016/j.dss.2008.10.001	Identifying RFID-embedded objects in pervasive healthcare applications	DECISION SUPPORT SYSTEMS	84	3	1	3.847		0	1	0
10.1016/j.inffus.2013.10.002	Using multi-sensor data fusion for vibration fault diagnosis of rolling element bearings by accelerometer and load cell	INFORMATION FUSION	84	3	1	10.716		0	0	0
10.1007/s10462-011-9222-1	The state-of-the-art in personalized recommender systems for social networking	ARTIFICIAL INTELLIGENCE REVIEW	84	2.25	3	5.095		2	0	0
10.1016/j.artint.2009.11.014	Interactive semantics	ARTIFICIAL INTELLIGENCE	84	1	1	4.483		1	0	0
10.1016/j.media.2010.05.008	Manifold modeling for brain population analysis	MEDICAL IMAGE ANALYSIS	84	1	2	8.88		2	0	0
10.1016/j.eswa.2013.12.011	Neural network ensemble operators for time series forecasting	EXPERT SYSTEMS WITH APPLICATIONS	84	1	1	4.292		1	0	0
10.1007/s11263-010-0354-6	Probabilistic Multi-Task Learning for Visual Saliency Estimation in Video	INTERNATIONAL JOURNAL OF COMPUTER VISION	84	1	1	6.071		1	0	0
10.1016/j.dss.2012.12.020	ExpertRank: A topic-aware expert finding algorithm for online knowledge communities	DECISION SUPPORT SYSTEMS	83	10	3	3.847		0	2	1
10.1007/s11263-010-0360-8	Anthropometric 3D Face Recognition	INTERNATIONAL JOURNAL OF COMPUTER VISION	83	6	2	6.071		0	1	0
10.1016/j.eswa.2010.08.008	Service chain-based business alliance formation in service-oriented architecture	EXPERT SYSTEMS WITH APPLICATIONS	83	6	5	4.292		0	5	0
10.1016/j.media.2011.03.001	Entropy and Laplacian images: Structural representations for multi-modal registration	MEDICAL IMAGE ANALYSIS	83	3.5	2	8.88		1	0	0
10.1016/j.artint.2008.12.002	Automatic generation of textual summaries from neonatal intensive care data	ARTIFICIAL INTELLIGENCE	83	3	2	4.483		0	0	0
10.1016/j.dss.2009.08.005	Failure mode and effects analysis by data envelopment analysis	DECISION SUPPORT SYSTEMS	83	3	1	3.847		0	1	0
10.1016/j.eswa.2007.11.061	Mining frequent itemsets over data streams using efficient window sliding techniques	EXPERT SYSTEMS WITH APPLICATIONS	83	3	1	4.292		0	1	0
10.1016/j.patcog.2013.06.028	The largest inertial sensor-based gait database and performance evaluation of gait-based personal authentication	PATTERN RECOGNITION	83	3	1	5.898		0	1	0
10.1016/j.patcog.2010.12.015	Supervised principal component analysis: Visualization classification and regression on subspaces and submanifolds	PATTERN RECOGNITION	83	1	3	5.898		3	0	0
10.1007/s10514-011-9234-3	Incremental kinesthetic teaching of motion primitives using the motion refinement tube	AUTONOMOUS ROBOTS	83	0.25	1	3.634		0	0	0
10.1016/j.eswa.2013.07.106	DENDROID: A text mining approach to analyzing and classifying code structures in Android malware families	EXPERT SYSTEMS WITH APPLICATIONS	82	24	3	4.292		0	0	3
10.1016/j.dss.2013.04.001	Website attributes in urging online impulse purchase: An empirical investigation on consumer perceptions	DECISION SUPPORT SYSTEMS	82	14	8	3.847		4	0	4
10.1016/j.neucom.2015.05.116	A review of swarm robotics tasks	NEUROCOMPUTING	82	11.5	2	4.072		1	0	0
10.1016/j.patrec.2013.01.021	Silhouette-based human action recognition using sequences of key poses	PATTERN RECOGNITION LETTERS	82	5.1	4	2.81		2	0	0
10.1016/j.asoc.2007.10.006	Particle swarm optimization technique based short-term hydrothermal scheduling	APPLIED SOFT COMPUTING	82	3	2	4.873		0	2	0
10.1016/j.eswa.2011.02.083	Application of context-aware and personalized recommendation to implement an adaptive ubiquitous learning system	EXPERT SYSTEMS WITH APPLICATIONS	82	1	1	4.292		1	0	0
10.1016/j.media.2012.09.003	Single-image super-resolution of brain MR images using overcomplete dictionaries	MEDICAL IMAGE ANALYSIS	82	1	1	8.88		1	0	0
10.1016/j.eswa.2015.10.041	An analysis of DEMATEL approaches for criteria interaction handling within ANP	EXPERT SYSTEMS WITH APPLICATIONS	82	0.5	1	4.292		1	0	0
10.1016/j.dss.2012.06.010	Theories in online information privacy research: A critical review and an integrated framework	DECISION SUPPORT SYSTEMS	82	0.5	1	3.847		1	0	0
10.1007/s10851-014-0523-2	An Inertial Forward-Backward Algorithm for Monotone Inclusions	JOURNAL OF MATHEMATICAL IMAGING AND VISION	81	10.33	7	1.603		3	0	0
10.1016/j.patrec.2007.12.001	Optimum Gabor filter design and local binary patterns for texture segmentation	PATTERN RECOGNITION LETTERS	81	9.5	11	2.81		1	10	0
10.1016/j.patcog.2011.05.017	Semantic hierarchies for image annotation: A survey	PATTERN RECOGNITION	81	9.064	2	5.898		0	1	0
10.1016/j.cviu.2009.11.004	Fusion of range and color images for denoising and resolution enhancement with a non-local filter	COMPUTER VISION AND IMAGE UNDERSTANDING	81	9	3	2.645		0	3	0
10.1016/j.eswa.2008.12.033	Evolutionary algorithms based design of multivariable PID controller	EXPERT SYSTEMS WITH APPLICATIONS	81	6	3	4.292		0	3	0
10.1145/1740600.1740604	Interoperable and Adaptive Fuzzy Services for Ambient Intelligence Applications	ACM TRANSACTIONS ON AUTONOMOUS AND ADAPTIVE SYSTEMS	81	6	3	2.66		0	2	0
10.1007/s11263-010-0361-7	RSLAM: A System for Large-Scale Mapping in Constant-Time Using Stereo	INTERNATIONAL JOURNAL OF COMPUTER VISION	81	6	2	6.071		0	2	0
10.1016/j.eswa.2012.02.149	A new grouping genetic algorithm for clustering problems	EXPERT SYSTEMS WITH APPLICATIONS	81	3	1	4.292		0	1	0
10.1016/j.media.2010.07.006	Coupled minimum-cost flow cell tracking for high-throughput quantitative analysis	MEDICAL IMAGE ANALYSIS	81	3	1	8.88		0	1	0
10.1007/s11263-006-0017-9	Fast non-rigid surface detection registration and realistic augmentation	INTERNATIONAL JOURNAL OF COMPUTER VISION	81	3	5	6.071		0	5	0
10.1016/j.datak.2012.02.005	From humor recognition to irony detection: The figurative language of social media	DATA & KNOWLEDGE ENGINEERING	81	3	5	1.583		5	0	0
10.1016/j.artint.2007.09.006	MEBN: A language for first-order Bayesian knowledge bases	ARTIFICIAL INTELLIGENCE	81	3	2	4.483		0	2	0
10.1016/j.patcog.2012.02.031	Robust face detection using local gradient patterns and evidence accumulation	PATTERN RECOGNITION	81	3	4	5.898		0	4	0
10.1016/j.inffus.2015.06.002	Opinion Mining and Information Fusion: A survey	INFORMATION FUSION	81	1.5	2	10.716		2	0	0
10.1016/j.patcog.2015.10.001	Adaptive imputation of missing values for incomplete pattern classification	PATTERN RECOGNITION	81	0.5	2	5.898		2	0	0
10.1016/j.asoc.2014.11.053	Intuitionistic fuzzy parameterized soft set theory and its decision making	APPLIED SOFT COMPUTING	81	0.5	1	4.873		1	0	0
10.1016/j.neunet.2014.01.010	Synchronization control of memristor-based recurrent neural networks with perturbations	NEURAL NETWORKS	81	0.25	1	5.785		0	0	0
10.1016/j.eswa.2014.11.009	A novel feature-selection approach based on the cuttlefish optimization algorithm for intrusion detection systems	EXPERT SYSTEMS WITH APPLICATIONS	80	3	1	4.292		0	0	0
10.1016/j.media.2011.02.005	Nonlinear registration of longitudinal images and measurement of change in regions of interest	MEDICAL IMAGE ANALYSIS	80	3	3	8.88		0	3	0
10.1007/s11263-010-0400-4	Recovering Occlusion Boundaries from an Image	INTERNATIONAL JOURNAL OF COMPUTER VISION	80	3	1	6.071		0	1	0
10.1016/j.aei.2016.07.001	Big Data in the construction industry: A review of present status opportunities and future trends	ADVANCED ENGINEERING INFORMATICS	80	1.5	2	3.772		2	0	0
10.1016/j.eswa.2010.09.131	A recommender system based on tag and time information for social tagging systems	EXPERT SYSTEMS WITH APPLICATIONS	80	1	1	4.292		1	0	0
10.1016/j.artmed.2013.07.004	Hybrid brain-computer interfaces and hybrid neuroprostheses for restoration of upper limb functions in individuals with high-level spinal cord injury	ARTIFICIAL INTELLIGENCE IN MEDICINE	79	10	2	3.574		1	0	1
10.1016/j.patcog.2012.03.002	Towards automatic polyp detection with a polyp appearance model	PATTERN RECOGNITION	79	9	6	5.898		0	6	0
10.1016/j.media.2013.10.005	Three-dimensional solid texture analysis in biomedical imaging: Review and opportunities	MEDICAL IMAGE ANALYSIS	79	8	4	8.88		1	2	0
10.1016/j.patcog.2008.08.016	A configurable method for multi-style license plate recognition	PATTERN RECOGNITION	79	3	8	5.898		0	8	0
10.1016/j.patrec.2012.04.007	A novel biometric system based on palm vein image	PATTERN RECOGNITION LETTERS	79	3	1	2.81		0	1	0
10.1016/j.csl.2009.07.003	Bayesian update of dialogue state: A POMDP framework for spoken dialogue systems	COMPUTER SPEECH AND LANGUAGE	79	3	2	1.857		0	2	0
10.1007/s11263-011-0426-2	Fast and Accurate 3D Face Recognition	INTERNATIONAL JOURNAL OF COMPUTER VISION	79	3	1	6.071		0	0	0
10.1016/j.websem.2007.11.008	Metcalfe's law Web 2.0 and the Semantic Web	JOURNAL OF WEB SEMANTICS	79	3	5	2.429		0	5	0
10.1016/j.media.2014.09.005	Multi-atlas segmentation with augmented features for cardiac MR images	MEDICAL IMAGE ANALYSIS	79	3	1	8.88		0	1	0
10.1016/j.imavis.2008.04.018	Taking the bite out of automated naming of characters in TV video	IMAGE AND VISION COMPUTING	79	3	1	2.733		0	1	0
10.1016/j.cviu.2008.07.009	Vessel enhancement filter using directional filter bank	COMPUTER VISION AND IMAGE UNDERSTANDING	79	3	2	2.645		0	2	0
10.1016/j.inffus.2011.08.003	Integrating generic sensor fusion algorithms with sound state representations through encapsulation of manifolds	INFORMATION FUSION	79	2.5	1	10.716		0	0	0
10.1016/j.dss.2016.04.001	Consumer behavior in social commerce: A literature review	DECISION SUPPORT SYSTEMS	79	1.35	2	3.847		2	0	0
10.1007/s10994-012-5278-7	Optimal control as a graphical model inference problem	MACHINE LEARNING	79	1	1	2.809		1	0	0
10.1016/j.ijar.2012.10.003	Soft clustering - fuzzy and rough approaches and their extensions and derivatives	INTERNATIONAL JOURNAL OF APPROXIMATE REASONING	79	1	1	1.982		1	0	0
10.1016/j.dss.2012.07.002	IT as enabler of sustainable farming: An empirical analysis of farmers' adoption decision of precision agriculture technology	DECISION SUPPORT SYSTEMS	79	0.5	1	3.847		1	0	0
10.1016/j.dss.2012.04.010	Three decades of research on consumer adoption and utilization of electronic banking channels: A literature analysis	DECISION SUPPORT SYSTEMS	79	0.5	1	3.847		1	0	0
10.1007/s10732-011-9186-y	An Iterated Local Search heuristic for the Heterogeneous Fleet Vehicle Routing Problem	JOURNAL OF HEURISTICS	78	3.5	3	1.392		2	0	0
10.1016/j.patcog.2007.11.007	A fast separability-based feature-selection method for high-dimensional remotely sensed image classification	PATTERN RECOGNITION	78	3	1	5.898		0	1	0
10.1016/j.patcog.2009.12.020	Clothing-invariant gait identification using part-based clothing categorization and adaptive weight control	PATTERN RECOGNITION	78	3	2	5.898		0	2	0
10.1007/s11263-009-0206-4	Image Fusion for Enhanced Visualization: A Variational Approach	INTERNATIONAL JOURNAL OF COMPUTER VISION	78	3	2	6.071		0	2	0
10.1016/j.dss.2012.08.008	Multi actor multi criteria analysis (MAMCA) as a tool to support sustainable decisions: State of use	DECISION SUPPORT SYSTEMS	78	3	4	3.847		0	0	0
10.1016/j.eswa.2007.08.093	Real-time credit card fraud detection using computational intelligence	EXPERT SYSTEMS WITH APPLICATIONS	78	3	3	4.292		0	3	0
10.1007/s10115-015-0830-y	A survey on indexing techniques for big data: taxonomy and performance evaluation	KNOWLEDGE AND INFORMATION SYSTEMS	78	2.25	4	2.397		3	0	0
10.1016/j.eswa.2014.08.029	Credit scoring using the clustered support vector machine	EXPERT SYSTEMS WITH APPLICATIONS	78	1.85	2	4.292		2	0	0
10.1007/s10710-013-9210-0	A survey of semantic methods in genetic programming	GENETIC PROGRAMMING AND EVOLVABLE MACHINES	78	0.5	1	1.333		1	0	0
10.1016/j.media.2008.12.003	A 2D/3D correspondence building method for reconstruction of a patient-specific 3D bone surface model using point distribution models and calibrated X-ray images	MEDICAL IMAGE ANALYSIS	77	6	2	8.88		0	2	0
10.1007/s10115-016-0987-z	A survey of methods for time series change point detection	KNOWLEDGE AND INFORMATION SYSTEMS	77	5.7	8	2.397		8	0	0
10.1016/j.csl.2012.02.005	Paralinguistics in speech and language State-of-the-art and the challenge	COMPUTER SPEECH AND LANGUAGE	77	5.5	6	1.857		5	1	0
10.1016/j.patcog.2010.11.015	Recent advances in graph-based pattern recognition with applications in document analysis	PATTERN RECOGNITION	77	3.25	2	5.898		0	1	0
10.1016/j.patcog.2008.10.035	Computer-aided evaluation of neuroblastoma on whole-slide histology images: Classifying grade of neuroblastic differentiation	PATTERN RECOGNITION	77	3	2	5.898		0	2	0
10.1016/j.media.2010.06.001	GRAM: A framework for geodesic registration on anatomical manifolds	MEDICAL IMAGE ANALYSIS	77	3	1	8.88		0	1	0
10.1007/s11263-008-0181-1	Semantic Representation and Recognition of Continued and Recursive Human Activities	INTERNATIONAL JOURNAL OF COMPUTER VISION	77	3	1	6.071		0	1	0
10.1016/j.neunet.2008.06.016	The Emergent neural modeling system	NEURAL NETWORKS	77	3	1	5.785		0	0	0
10.1145/2337542.2337551	Twitter My Space Digg: Unsupervised Sentiment Analysis in Social Media	ACM TRANSACTIONS ON INTELLIGENT SYSTEMS AND TECHNOLOGY	77	3	1	2.861		0	0	0
10.1016/j.eswa.2013.08.009	Evolutionary joint selection to improve human action recognition with RGB-D devices	EXPERT SYSTEMS WITH APPLICATIONS	77	1.85	2	4.292		2	0	0
10.1007/s12559-016-9404-x	Deep Belief Networks for Quantitative Analysis of a Gold Immunochromatographic Strip	COGNITIVE COMPUTATION	77	1	3	4.287		3	0	0
10.1007/s11263-008-0194-9	Detection and Segmentation of Multiple Partially Occluded Objects by Grouping Merging Assigning Part Detection Responses	INTERNATIONAL JOURNAL OF COMPUTER VISION	76	6	3	6.071		0	3	0
10.1016/j.eswa.2006.12.016	Back-propagation neural network based importance-performance analysis for determining critical service attributes	EXPERT SYSTEMS WITH APPLICATIONS	76	3	1	4.292		0	1	0
10.1016/j.neucom.2012.09.042	Multi-scale gray level co-occurrence matrices for texture description	NEUROCOMPUTING	76	3	2	4.072		0	2	0
10.1016/j.media.2011.10.006	Temporal diffeomorphic free-form deformation: Application to motion and strain estimation from 3D echocardiography	MEDICAL IMAGE ANALYSIS	76	3	6	8.88		0	6	0
10.3389/fnbot.2014.00022	Proceedings of the first workshop on Peripheral Machine Interfaces: going beyond traditional surface electromyography	FRONTIERS IN NEUROROBOTICS	76	2.25	3	3		3	0	0
10.1007/s10710-012-9177-2	Better GP benchmarks: community survey results and proposals	GENETIC PROGRAMMING AND EVOLVABLE MACHINES	76	1	2	1.333		2	0	0
10.1016/j.patcog.2013.11.032	Human activity recognition using multi-features and multiple kernel learning	PATTERN RECOGNITION	76	0.5	1	5.898		1	0	0
10.1016/j.patrec.2011.09.018	Pattern recognition approach to identify natural clusters of acoustic emission signals	PATTERN RECOGNITION LETTERS	76	0.5	1	2.81		1	0	0
10.1016/j.patcog.2013.11.014	Robust level set image segmentation via a local correntropy-based K-means clustering	PATTERN RECOGNITION	76	0.25	1	5.898		0	0	0
10.1016/j.cviu.2007.02.003	Estimating pedestrian counts in groups	COMPUTER VISION AND IMAGE UNDERSTANDING	75	9	5	2.645		0	5	0
10.1016/j.eswa.2008.07.042	Driver identification using finger-vein patterns with Radon transform and neural network	EXPERT SYSTEMS WITH APPLICATIONS	75	6	2	4.292		0	2	0
10.1016/j.eswa.2013.08.015	Syntactic N-grams as machine learning features for natural language processing	EXPERT SYSTEMS WITH APPLICATIONS	75	6	2	4.292		0	1	0
10.1007/s10618-010-0210-x	Leveraging social media networks for classification	DATA MINING AND KNOWLEDGE DISCOVERY	75	4	2	2.879		1	1	0
10.1016/j.aei.2011.06.005	A patent quality analysis for innovative technology and product development	ADVANCED ENGINEERING INFORMATICS	75	3.5	2	3.772		1	1	0
10.1016/j.eswa.2008.12.002	Development of RFID-based Reverse Logistics System	EXPERT SYSTEMS WITH APPLICATIONS	75	3	1	4.292		0	0	0
10.1007/s11263-010-0404-0	Stereoscopic Scene Flow Computation for 3D Motion Understanding	INTERNATIONAL JOURNAL OF COMPUTER VISION	75	3	1	6.071		0	1	0
10.1016/j.knosys.2015.04.022	Random Balance: Ensembles of variable priors classifiers for imbalanced data	KNOWLEDGE-BASED SYSTEMS	75	2	2	5.101		2	0	0
10.1007/s10618-012-0264-z	Clustering daily patterns of human activities in the city	DATA MINING AND KNOWLEDGE DISCOVERY	75	1.5	2	2.879		2	0	0
10.1007/s10514-012-9283-2	Optimization-based iterative learning for precise quadrocopter trajectory tracking	AUTONOMOUS ROBOTS	75	0.75	2	3.634		1	0	0
10.1007/s10618-014-0361-2	Time series classification with ensembles of elastic distance measures	DATA MINING AND KNOWLEDGE DISCOVERY	75	0.5	1	2.879		1	0	0
10.1016/j.eswa.2006.09.033	A location-aware recommender system for mobile shopping environments	EXPERT SYSTEMS WITH APPLICATIONS	74	9	5	4.292		0	4	0
10.1016/j.eswa.2007.01.029	Random forests for multiclass classification: Random MultiNomial Logit	EXPERT SYSTEMS WITH APPLICATIONS	74	6	2	4.292		0	1	0
10.1016/j.patcog.2008.05.008	Invited paper: Automatic speech recognition: History methods and challenges	PATTERN RECOGNITION	74	4	2	5.898		1	1	0
10.1016/j.artint.2009.12.002	Automated composition of Web services via planning in asynchronous domains	ARTIFICIAL INTELLIGENCE	74	3	1	4.483		0	1	0
10.1016/j.patcog.2012.10.005	Automated delineation of lung tumors from CT images using a single click ensemble segmentation approach	PATTERN RECOGNITION	74	3	1	5.898		0	0	0
10.1016/j.patcog.2009.10.014	Effective segmentation and classification for HCC biopsy images	PATTERN RECOGNITION	74	3	1	5.898		0	1	0
10.1016/j.eswa.2010.02.045	Epileptic EEG detection using the linear prediction error energy	EXPERT SYSTEMS WITH APPLICATIONS	74	3	1	4.292		0	1	0
10.1007/s10514-009-9171-6	Pneumatic-driven jumping robot with anthropomorphic muscular skeleton structure	AUTONOMOUS ROBOTS	74	3	1	3.634		0	1	0
10.1007/s11263-012-0587-7	Modeling Coverage in Camera Networks: A Survey	INTERNATIONAL JOURNAL OF COMPUTER VISION	74	1.85	2	6.071		2	0	0
10.1016/j.dss.2013.02.006	Automated news reading: Stock price prediction based on financial news using context-capturing features	DECISION SUPPORT SYSTEMS	74	1.35	2	3.847		2	0	0
10.1016/j.websem.2012.02.001	An empirical survey of Linked Data conformance	JOURNAL OF WEB SEMANTICS	74	1	1	2.429		0	0	0
10.1007/s10732-009-9103-9	Two-phase Pareto local search for the biobjective traveling salesman problem	JOURNAL OF HEURISTICS	74	0.5	3	1.392		3	0	0
10.1016/j.neunet.2009.05.005	Bias optimal linear estimation and the differences between open-loop simulation and closed-loop performance of spiking-based brain-computer interface algorithms	NEURAL NETWORKS	74	0.25	2	5.785		0	0	0
10.1016/j.patcog.2010.03.009	A review of vision-based systems for soccer video analysis	PATTERN RECOGNITION	73	10	8	5.898		1	7	0
10.1016/j.imavis.2007.05.004	Non-intrusive liveness detection by face images	IMAGE AND VISION COMPUTING	73	10	21	2.733		2	19	0
10.1016/j.patcog.2009.07.004	A symmetry based multiobjective clustering technique for automatic evolution of clusters	PATTERN RECOGNITION	73	7	1	5.898		0	0	1
10.1016/j.csl.2008.11.001	Super-human multi-talker speech recognition: A graphical modeling approach	COMPUTER SPEECH AND LANGUAGE	73	6	5	1.857		0	5	0
10.1016/j.neucom.2017.01.026	Machine learning on big data: Opportunities and challenges	NEUROCOMPUTING	73	4.25	6	4.072		6	0	0
10.1007/s11263-013-0634-z	Rotation-Invariant HOG Descriptors Using Fourier Analysis in Polar and Spherical Coordinates	INTERNATIONAL JOURNAL OF COMPUTER VISION	73	3.5	2	6.071		1	1	0
10.1016/j.patrec.2008.02.011	Automatic player detection labeling and tracking in broadcast soccer video	PATTERN RECOGNITION LETTERS	73	3	4	2.81		0	4	0
10.1007/s11263-007-0120-6	Simultaneous segmentation and pose estimation of humans using dynamic graph cuts	INTERNATIONAL JOURNAL OF COMPUTER VISION	73	3	2	6.071		0	2	0
10.1016/j.patcog.2016.10.019	Hyperspectral image reconstruction by deep convolutional neural network for classification	PATTERN RECOGNITION	73	1	1	5.898		1	0	0
10.1007/s13042-010-0007-7	Multiple classifier systems for robust classifier design in adversarial environments	INTERNATIONAL JOURNAL OF MACHINE LEARNING AND CYBERNETICS	73	1	1	3.844		1	0	0
10.1016/j.neucom.2011.11.001	A two-stage genetic algorithm for automatic clustering	NEUROCOMPUTING	73	0.5	7	4.072		7	0	0
10.1016/j.patcog.2011.02.019	A dynamic over-sampling procedure based on sensitivity for multi-class problems	PATTERN RECOGNITION	73	0.25	1	5.898		0	0	0
10.1016/j.cviu.2011.04.001	Color texture image segmentation based on neutrosophic set and wavelet transformation	COMPUTER VISION AND IMAGE UNDERSTANDING	72	3	1	2.645		0	1	0
10.1016/j.eswa.2012.12.015	Detecting malicious tweets in trending topics using a statistical analysis of language	EXPERT SYSTEMS WITH APPLICATIONS	72	3	4	4.292		0	4	0
10.1016/j.imavis.2008.04.014	Fast image blending using watersheds and graph cuts	IMAGE AND VISION COMPUTING	72	3	15	2.733		0	15	0
10.1016/j.patcog.2009.05.007	Handwritten document image segmentation into text lines and words	PATTERN RECOGNITION	72	3	1	5.898		0	1	0
10.1016/j.media.2010.04.007	High-throughput detection of prostate cancer in histological sections using probabilistic pairwise Markov models	MEDICAL IMAGE ANALYSIS	72	3	1	8.88		0	1	0
10.1007/s11263-013-0609-0	Recognizing Materials Using Perceptually Inspired Features	INTERNATIONAL JOURNAL OF COMPUTER VISION	72	3	2	6.071		0	2	0
10.1007/s10618-008-0118-x	Sourcerer: mining and searching internet-scale software repositories	DATA MINING AND KNOWLEDGE DISCOVERY	72	3	2	2.879		0	2	0
10.1016/j.patrec.2014.09.006	Smartphone based visible iris recognition using deep sparse filtering	PATTERN RECOGNITION LETTERS	72	1.25	2	2.81		1	0	0
10.1007/s11263-015-0809-x	A Comparative Study of Modern Inference Techniques for Structured Discrete Energy Minimization Problems	INTERNATIONAL JOURNAL OF COMPUTER VISION	72	1	1	6.071		0	0	0
10.1016/j.patcog.2014.07.007	A context-aware approach for long-term behavioural change detection and abnormality prediction in ambient assisted living	PATTERN RECOGNITION	72	1	1	5.898		1	0	0
10.1016/j.asoc.2008.04.008	Fuzzy logic techniques for navigation of several mobile robots	APPLIED SOFT COMPUTING	72	1	1	4.873		1	0	0
10.1016/j.artint.2014.02.004	The dropout learning algorithm	ARTIFICIAL INTELLIGENCE	71	11.758	5	4.483		2	1	0
10.1007/s11263-007-0049-9	A theory of refractive and specular 3D shape by light-path triangulation	INTERNATIONAL JOURNAL OF COMPUTER VISION	71	6	2	6.071		0	2	0
10.1016/j.csl.2011.03.001	Minimum Bayes Risk decoding and system combination based on a recursion for edit distance	COMPUTER SPEECH AND LANGUAGE	71	6	12	1.857		0	12	0
10.1007/s00138-007-0105-z	Feature tracking and matching in video using programmable graphics hardware	MACHINE VISION AND APPLICATIONS	71	3	17	1.788		0	17	0
10.1016/j.imavis.2011.11.008	Regression-based intensity estimation of facial action units	IMAGE AND VISION COMPUTING	71	3	1	2.733		0	1	0
10.1016/j.media.2010.07.005	Semi-automatic construction of reference standards for evaluation of image registration	MEDICAL IMAGE ANALYSIS	71	3	1	8.88		0	1	0
10.1016/j.csl.2008.10.001	The RavenClaw dialog management framework: Architecture and systems	COMPUTER SPEECH AND LANGUAGE	71	3	3	1.857		0	3	0
10.1007/s10618-008-0116-z	Transaction aggregation as a strategy for credit card fraud detection	DATA MINING AND KNOWLEDGE DISCOVERY	71	3	1	2.879		0	1	0
10.1016/j.neunet.2009.12.004	Parameter-exploring policy gradients	NEURAL NETWORKS	71	1.85	2	5.785		2	0	0
10.1007/s10514-014-9385-0	Fast RGB-D people tracking for service robots	AUTONOMOUS ROBOTS	71	1.6	3	3.634		2	0	0
10.1016/j.eswa.2017.04.030	Deep learning networks for stock market analysis and prediction: Methodology data representations and case studies	EXPERT SYSTEMS WITH APPLICATIONS	71	1.35	2	4.292		2	0	0
10.1007/s12559-014-9276-x	Interactive Technologies for Autistic Children: A Review	COGNITIVE COMPUTATION	71	1	2	4.287		2	0	0
10.1016/j.knosys.2014.05.016	Meta-level sentiment models for big social data analysis	KNOWLEDGE-BASED SYSTEMS	71	1	1	5.101		1	0	0
10.1016/j.asoc.2009.08.023	Multi-colony bacteria foraging optimization with cell-to-cell communication for RFID network planning	APPLIED SOFT COMPUTING	71	1	1	4.873		1	0	0
10.1016/j.asoc.2013.05.022	Ant colony optimization with immigrants schemes for the dynamic travelling salesman problem with traffic factors	APPLIED SOFT COMPUTING	71	0.5	5	4.873		5	0	0
10.1016/j.neucom.2011.08.026	Analysis and design of associative memories based on recurrent neural network with discontinuous activation functions	NEUROCOMPUTING	71	0.25	1	4.072		1	0	0
10.1016/j.cviu.2009.03.008	The segmented and annotated IAPR TC-12 benchmark	COMPUTER VISION AND IMAGE UNDERSTANDING	71	0	1	2.645		0	0	0
10.1016/j.imavis.2012.10.005	Accurate subpixel edge location based on partial area effect	IMAGE AND VISION COMPUTING	70	6	4	2.733		0	3	0
10.1016/j.media.2012.08.003	Computer-aided colorectal tumor classification in NBI endoscopy using local features	MEDICAL IMAGE ANALYSIS	70	4	3	8.88		1	2	0
10.1007/s10115-010-0288-x	A two-stage gene selection scheme utilizing MRMR filter and GA wrapper	KNOWLEDGE AND INFORMATION SYSTEMS	70	3	2	2.397		0	2	0
10.1016/j.eswa.2007.03.004	An empirical study of the effects of knowledge sharing and learning behaviors on firm performance	EXPERT SYSTEMS WITH APPLICATIONS	70	3	1	4.292		0	1	0
10.1016/j.aei.2007.10.001	Soft computing in engineering design - A review	ADVANCED ENGINEERING INFORMATICS	70	3	1	3.772		0	1	0
10.1016/j.knosys.2011.01.012	Evolutionary-based selection of generalized instances for imbalanced classification	KNOWLEDGE-BASED SYSTEMS	70	2.35	4	5.101		4	0	0
10.1007/s10618-012-0258-x	A survey on enhanced subspace clustering	DATA MINING AND KNOWLEDGE DISCOVERY	70	1	1	2.879		1	0	0
10.1016/j.datak.2011.01.004	Analysis on demand: Instantaneous soundness checking of industrial business process models	DATA & KNOWLEDGE ENGINEERING	70	1	1	1.583		1	0	0
10.1016/j.artmed.2016.04.004	A novel method to use fuzzy soft sets in decision making based on ambiguity measure and Dempster-Shafer theory of evidence: An application in medical diagnosis	ARTIFICIAL INTELLIGENCE IN MEDICINE	70	0.5	1	3.574		1	0	0
10.1016/j.eswa.2013.10.013	An agent-based simulation system for concert venue crowd evacuation modeling in the presence of a fire disaster	EXPERT SYSTEMS WITH APPLICATIONS	70	0.5	1	4.292		1	0	0
10.1016/j.cogsys.2008.03.002	Affective guidance of intelligent agents: How emotion controls cognition	COGNITIVE SYSTEMS RESEARCH	70	0.25	1	1.384		0	0	0
10.1016/j.patcog.2017.05.015	How deep learning extracts and learns leaf features for plant classification	PATTERN RECOGNITION	70	0.25	1	5.898		0	0	0
10.1016/j.patcog.2009.12.009	Real-time 2D+3D facial action and expression recognition	PATTERN RECOGNITION	70	0.25	1	5.898		0	0	0
10.1016/j.patcog.2008.11.030	Faster retrieval with a two-pass dynamic-time-warping lower bound	PATTERN RECOGNITION	69	14.588	9	5.898		2	0	0
10.1016/j.patcog.2008.10.033	A stochastic graph grammar for compositional object representation and recognition	PATTERN RECOGNITION	69	9	12	5.898		0	12	0
10.1016/j.csl.2008.03.004	A computational auditory scene analysis system for speech segregation and robust speech recognition	COMPUTER SPEECH AND LANGUAGE	69	6	5	1.857		0	5	0
10.1016/j.media.2008.05.002	Axon tracking in serial block-face scanning electron microscopy	MEDICAL IMAGE ANALYSIS	69	6	2	8.88		0	2	0
10.1016/j.eswa.2012.02.053	SMS spam filtering: Methods and data	EXPERT SYSTEMS WITH APPLICATIONS	69	3.25	2	4.292		0	0	0
10.1007/s10462-011-9236-8	A tutorial on variational Bayesian inference	ARTIFICIAL INTELLIGENCE REVIEW	69	3	1	5.095		0	0	0
10.1016/j.knosys.2011.11.021	Automatic microcalcification and cluster detection for digital and digitised mammograms	KNOWLEDGE-BASED SYSTEMS	69	3	2	5.101		0	2	0
10.1016/j.media.2009.09.001	Automatic segmentation of colon glands using object-graphs	MEDICAL IMAGE ANALYSIS	69	3	1	8.88		0	1	0
10.1016/j.eswa.2011.11.019	Bearing fault prognosis based on health state probability estimation	EXPERT SYSTEMS WITH APPLICATIONS	69	3	1	4.292		0	1	0
10.1016/j.patcog.2008.05.007	Graph spectral image smoothing using the heat kernel	PATTERN RECOGNITION	69	2.5	1	5.898		0	0	0
10.1016/j.eswa.2014.09.024	Business intelligence in banking: A literature analysis from 2002 to 2013 using text mining and latent Dirichlet allocation	EXPERT SYSTEMS WITH APPLICATIONS	69	2.25	3	4.292		3	0	0
10.1016/j.dss.2014.10.004	Sentiment analysis: Bayesian Ensemble Learning	DECISION SUPPORT SYSTEMS	69	1.85	2	3.847		2	0	0
10.1016/j.knosys.2015.03.001	A new similarity measure using Bhattacharyya coefficient for collaborative filtering in sparse data	KNOWLEDGE-BASED SYSTEMS	69	1	1	5.101		0	0	0
10.1007/s12559-016-9396-6	A Novel Switching Delayed PSO Algorithm for Estimating Unknown Parameters of Lateral Flow Immunoassay	COGNITIVE COMPUTATION	69	1	3	4.287		3	0	0
10.1016/j.neucom.2015.02.047	Detecting spammers on social networks	NEUROCOMPUTING	69	1	1	4.072		0	0	0
10.1016/j.eswa.2009.10.005	A new Hybrid Electromagnetism-like Algorithm for capacitated vehicle routing problems	EXPERT SYSTEMS WITH APPLICATIONS	69	0.75	4	4.292		4	0	0
10.1016/j.asoc.2010.12.006	An efficient genetic algorithm for hybrid flow shop scheduling with multiprocessor task problems	APPLIED SOFT COMPUTING	69	0.25	5	4.873		5	0	0
10.1016/j.neucom.2011.06.033	Archetypal analysis for machine learning and data mining	NEUROCOMPUTING	69	0.25	1	4.072		1	0	0
10.1016/j.media.2014.06.001	Fast automatic myocardial segmentation in 4D cine CMR datasets	MEDICAL IMAGE ANALYSIS	69	0.25	1	8.88		0	0	0
10.1016/j.eswa.2014.08.002	On the combination of genetic fuzzy systems and pairwise learning for improving detection rates on Intrusion Detection Systems	EXPERT SYSTEMS WITH APPLICATIONS	68	7	1	4.292		0	0	1
10.1016/j.cviu.2013.06.007	An on-line real-time learning method for detecting anomalies in videos using spatio-temporal compositions	COMPUTER VISION AND IMAGE UNDERSTANDING	68	6.25	3	2.645		0	2	0
10.1016/j.patcog.2007.09.007	A double-threshold image binarization method based on edge detector	PATTERN RECOGNITION	68	6	2	5.898		0	2	0
10.1016/j.patcog.2007.12.014	A novel algorithm for estimation of depth map using image focus for 3D shape recovery in the presence of noise	PATTERN RECOGNITION	68	6	2	5.898		0	2	0
10.1016/j.dss.2015.04.013	APATE: A novel approach for automated credit card transaction fraud detection using network-based extensions	DECISION SUPPORT SYSTEMS	68	4.2	7	3.847		7	0	0
10.1016/j.neunet.2014.10.005	Towards an intelligent framework for multimodal affective data analysis	NEURAL NETWORKS	68	3.75	4	5.785		3	0	0
10.1016/j.dss.2011.12.013	Factors of process model comprehension-Findings from a series of experiments	DECISION SUPPORT SYSTEMS	68	3.35	4	3.847		4	0	0
10.1016/j.bdr.2015.02.002	Promises and Challenges of Big Data Computing in Health Sciences	BIG DATA RESEARCH	68	3.35	7	2.952		7	0	0
10.1016/j.datak.2010.01.004	An unsupervised approach to activity recognition and segmentation based on object-use fingerprints	DATA & KNOWLEDGE ENGINEERING	68	3	1	1.583		0	1	0
10.1016/j.patcog.2009.01.001	Automatic 3D face recognition from depth and intensity Gabor features	PATTERN RECOGNITION	68	3	1	5.898		0	1	0
10.1137/090757617	Global Solutions of Variational Models with Convex Regularization	SIAM JOURNAL ON IMAGING SCIENCES	68	3	3	2.514		0	3	0
10.1016/j.eswa.2017.02.002	Enhancing deep learning sentiment analysis with ensemble techniques in social applications	EXPERT SYSTEMS WITH APPLICATIONS	68	1.5	2	4.292		2	0	0
10.1016/j.ijar.2010.02.003	A fuzzy random forest	INTERNATIONAL JOURNAL OF APPROXIMATE REASONING	68	1	1	1.982		1	0	0
10.1016/j.asoc.2012.01.015	Fuzzy cognitive maps for artificial emotions forecasting	APPLIED SOFT COMPUTING	67	18	5	4.873		3	0	1
10.1016/j.artmed.2011.05.001	Non-invasive estimate of blood glucose and blood pressure from a photoplethysmograph by means of machine learning techniques	ARTIFICIAL INTELLIGENCE IN MEDICINE	67	10.75	18	3.574		1	14	0
10.1016/j.eswa.2016.02.013	Interactive recommender systems: A survey of the state of the art and future research challenges and opportunities	EXPERT SYSTEMS WITH APPLICATIONS	67	10.2	19	4.292		18	0	0
10.1016/j.csl.2010.10.003	Turn-taking cues in task-oriented dialogue	COMPUTER SPEECH AND LANGUAGE	67	9	3	1.857		0	2	0
10.1016/j.artmed.2013.08.004	Transferring brain-computer interfaces beyond the laboratory: Successful application control for motor-disabled users	ARTIFICIAL INTELLIGENCE IN MEDICINE	67	7	1	3.574		0	0	1
10.1016/j.neucom.2008.09.010	Accurate short-term wind speed prediction by exploiting diversity in input data using banks of artificial neural networks	NEUROCOMPUTING	67	6	4	4.072		0	4	0
10.1137/110823766	The Natural Vectorial Total Variation Which Arises from Geometric Measure Theory	SIAM JOURNAL ON IMAGING SCIENCES	67	6	2	2.514		0	1	0
10.1007/s10514-009-9130-2	A Bayesian exploration-exploitation approach for optimal online sensing and planning with a visually guided mobile robot	AUTONOMOUS ROBOTS	67	5.08	1	3.634		0	0	0
10.1016/j.knosys.2009.01.002	Augmented fuzzy cognitive maps for modelling LMS critical success factors	KNOWLEDGE-BASED SYSTEMS	67	3	1	5.101		0	0	0
10.1016/j.neucom.2008.09.002	Bagging for Gaussian process regression	NEUROCOMPUTING	67	3	1	4.072		0	1	0
10.1137/090757034	Compressed Remote Sensing of Sparse Objects	SIAM JOURNAL ON IMAGING SCIENCES	67	3	1	2.514		0	1	0
10.1016/j.asoc.2009.11.022	JADE implemented mobile multi-agent based distributed information platform for pervasive health care monitoring	APPLIED SOFT COMPUTING	67	3	1	4.873		0	1	0
10.1016/j.patcog.2009.11.012	On voting-based consensus of cluster ensembles	PATTERN RECOGNITION	67	3	5	5.898		0	5	0
10.1007/s11263-011-0444-0	Segmentation of Natural Images by Texture and Boundary Compression	INTERNATIONAL JOURNAL OF COMPUTER VISION	67	3	1	6.071		0	0	0
10.1016/j.patcog.2008.05.011	Text line detection in handwritten documents	PATTERN RECOGNITION	67	3	2	5.898		0	2	0
10.1007/s00521-014-1560-x	Robust IMC-PID tuning for cascade control systems with gain and phase margin specifications	NEURAL COMPUTING & APPLICATIONS	67	2	2	4.664		2	0	0
10.1016/j.eswa.2016.10.050	New directional bat algorithm for continuous optimization problems	EXPERT SYSTEMS WITH APPLICATIONS	67	0.75	2	4.292		2	0	0
10.1016/j.dss.2014.01.008	Consumer decision-making across modern and traditional channels: E-commerce m-commerce in-store	DECISION SUPPORT SYSTEMS	67	0.5	1	3.847		1	0	0
10.1016/j.artint.2012.03.006	Learning multilingual named entity recognition from Wikipedia	ARTIFICIAL INTELLIGENCE	66	13.4	10	4.483		6	1	0
10.1016/j.neunet.2012.02.022	Extraction of temporally correlated features from dynamic vision sensors with spike-timing-dependent plasticity	NEURAL NETWORKS	66	12	4	5.785		0	3	0
10.1016/j.media.2009.07.009	Automatic segmentation of the liver from multi- and single-phase contrast-enhanced CT images	MEDICAL IMAGE ANALYSIS	66	9	3	8.88		0	3	0
10.1007/s00138-011-0355-7	Symmetry-based monocular vehicle detection system	MACHINE VISION AND APPLICATIONS	66	9	9	1.788		0	9	0
10.1016/j.bdr.2015.01.001	Reference Architecture and Classification of Technologies Products and Services for Big Data Systems	BIG DATA RESEARCH	66	5.2	10	2.952		8	0	0
10.1007/s10514-012-9294-z	A momentum-based balance controller for humanoid robots on non-level and non-stationary ground	AUTONOMOUS ROBOTS	66	3	1	3.634		0	1	0
10.1007/s10489-011-0315-y	A novel feature selection method based on normalized mutual information	APPLIED INTELLIGENCE	66	3	1	2.882		0	1	0
10.1016/j.inffus.2016.10.004	A review of natural language processing techniques for opinion mining systems	INFORMATION FUSION	66	3	2	10.716		0	0	0
10.1016/j.eswa.2007.11.029	Adaptive fuzzy logic controller for DC-DC converters	EXPERT SYSTEMS WITH APPLICATIONS	66	3	3	4.292		0	3	0
10.1016/j.dss.2014.05.002	Do actions speak louder than voices? The signaling role of social information cues in influencing consumer purchase decisions	DECISION SUPPORT SYSTEMS	66	3	1	3.847		0	0	0
10.1007/s00500-014-1511-6	Evaluation of machine learning classifiers for mobile malware detection	SOFT COMPUTING	66	3	1	2.784		0	1	0
10.1007/s10618-008-0093-2	Fast mining of distance-based outliers in high-dimensional datasets	DATA MINING AND KNOWLEDGE DISCOVERY	66	3	5	2.879		0	5	0
10.1145/1961189.1961202	Learning to Detect Malicious URLs	ACM TRANSACTIONS ON INTELLIGENT SYSTEMS AND TECHNOLOGY	66	3	5	2.861		0	5	0
10.1016/j.eswa.2014.10.024	Real-time illumination invariant lane detection for lane departure warning system	EXPERT SYSTEMS WITH APPLICATIONS	66	3	1	4.292		0	0	0
10.1016/j.cviu.2014.10.006	A comparison of 3D shape retrieval methods based on a large-scale benchmark supporting multimodal queries	COMPUTER VISION AND IMAGE UNDERSTANDING	66	1	1	2.645		1	0	0
10.1016/j.eswa.2015.08.013	Comprehensive analysis of distance and similarity measures for Wi-Fi fingerprinting indoor positioning systems	EXPERT SYSTEMS WITH APPLICATIONS	66	1	2	4.292		2	0	0
10.1016/j.eswa.2017.04.003	An up-to-date comparison of state-of-the-art classification algorithms	EXPERT SYSTEMS WITH APPLICATIONS	66	0.5	1	4.292		1	0	0
10.1016/j.datak.2009.02.002	Reusing ontologies on the Semantic Web: A feasibility study	DATA & KNOWLEDGE ENGINEERING	66	0.5	1	1.583		1	0	0
10.1007/s11263-011-0453-z	Compressed Histogram of Gradients: A Low-Bitrate Descriptor	INTERNATIONAL JOURNAL OF COMPUTER VISION	65	9	8	6.071		0	8	0
10.1016/j.artmed.2007.11.004	MOPET: A context-aware and user-adaptive wearable system for fitness training	ARTIFICIAL INTELLIGENCE IN MEDICINE	65	9	14	3.574		0	14	0
10.1016/j.patrec.2008.01.027	Word level multi-script identification	PATTERN RECOGNITION LETTERS	65	9	5	2.81		0	3	0
10.3389/fnbot.2016.00009	Deep Learning with Convolutional Neural Networks Applied to Electromyography Data: A Resource for the Classification of Movements for Prosthetic Hands	FRONTIERS IN NEUROROBOTICS	65	8.6	16	3		15	0	0
10.1016/j.websem.2010.10.001	Categorising social tags to improve folksonomy-based recommendations	JOURNAL OF WEB SEMANTICS	65	6	2	2.429		0	2	0
10.1016/j.patcog.2009.01.026	Towards an omnilingual word retrieval system for ancient manuscripts	PATTERN RECOGNITION	65	6	5	5.898		0	5	0
10.1145/1858948.1858955	Social Media as Crisis Platform: The Future of Community Maps/Crisis Maps	ACM TRANSACTIONS ON INTELLIGENT SYSTEMS AND TECHNOLOGY	65	3.5	3	2.861		1	0	0
10.1016/j.websem.2013.01.002	Binary RDF representation for publication and exchange (HDT)	JOURNAL OF WEB SEMANTICS	65	3.2	5	2.429		5	0	0
10.1016/j.asoc.2010.11.026	Support vector machine approach for longitudinal dispersion coefficients in natural streams	APPLIED SOFT COMPUTING	65	3	1	4.873		0	1	0
10.1049/iet-ipr.2014.0311	Simultaneous image fusion and denoising with adaptive sparse representation	IET Image Processing	65	2.2	3	2.004		3	0	0
10.1016/j.eswa.2010.03.035	Vehicle routing with cross-docking in the supply chain	EXPERT SYSTEMS WITH APPLICATIONS	65	1.25	7	4.292		7	0	0
10.1007/s11263-011-0492-5	Impact of Landmark Parametrization on Monocular EKF-SLAM with Points and Lines	INTERNATIONAL JOURNAL OF COMPUTER VISION	65	1	1	6.071		1	0	0
10.1016/j.knosys.2013.10.006	Ontology-based annotation and retrieval of services in the cloud	KNOWLEDGE-BASED SYSTEMS	65	1	1	5.101		1	0	0
10.1016/j.artint.2011.03.004	Preferences in AI: An overview	ARTIFICIAL INTELLIGENCE	65	1	1	4.483		0	0	0
10.1016/j.neucom.2013.09.010	Multi-step-ahead time series prediction using multiple-output support vector regression	NEUROCOMPUTING	65	0.75	3	4.072		3	0	0
10.1016/j.inffus.2016.11.010	A review of source term estimation methods for atmospheric dispersion events using static or mobile sensors	INFORMATION FUSION	65	0.5	1	10.716		1	0	0
10.1016/j.media.2012.02.001	Statistical 4D graphs for multi-organ abdominal segmentation from multiphase CT	MEDICAL IMAGE ANALYSIS	65	0.5	1	8.88		1	0	0
10.1016/j.artmed.2007.11.006	MEDIC: Medical embedded device for individualized care	ARTIFICIAL INTELLIGENCE IN MEDICINE	64	6	4	3.574		0	4	0
10.1016/j.media.2011.06.004	Segmentation of the heart and great vessels in CT images using a model-based adaptation framework	MEDICAL IMAGE ANALYSIS	64	6	2	8.88		0	2	0
10.1016/j.csl.2013.04.001	Ranked Word Net graph for Sentiment Polarity Classification in Twitter	COMPUTER SPEECH AND LANGUAGE	64	3.85	7	1.857		7	0	0
10.1002/int.21521	On Z-valuations using Zadeh's Z-numbers	INTERNATIONAL JOURNAL OF INTELLIGENT SYSTEMS	64	3	10	7.229		0	10	0
10.1016/j.media.2008.11.002	Simulation of brain tumors in MR images for evaluation of segmentation efficacy	MEDICAL IMAGE ANALYSIS	64	3	1	8.88		0	1	0
10.1016/j.cviu.2012.11.002	Text extraction from scene images by character appearance and structure modeling	COMPUTER VISION AND IMAGE UNDERSTANDING	64	3	1	2.645		0	1	0
10.1007/s10514-013-9334-3	Probabilistically safe motion planning to avoid dynamic obstacles with uncertain motion patterns	AUTONOMOUS ROBOTS	64	2.5	3	3.634		3	0	0
10.1016/j.asoc.2016.08.051	Application of a new combined intuitionistic fuzzy MCDM approach based on axiomatic design methodology for the supplier selection problem	APPLIED SOFT COMPUTING	64	2	2	4.873		1	0	0
10.1016/j.media.2013.10.016	Respiratory motion correction in dynamic MRI using robust data decomposition registration - Application to DCE-MRI	MEDICAL IMAGE ANALYSIS	64	1	2	8.88		2	0	0
10.1016/j.eswa.2010.06.060	Multi objective association rule mining with genetic algorithm without specifying minimum support and minimum confidence	EXPERT SYSTEMS WITH APPLICATIONS	64	0.25	4	4.292		4	0	0
10.1016/j.patcog.2008.08.006	Toward breast cancer diagnosis based on automated segmentation of masses in mammograms	PATTERN RECOGNITION	64	0.25	1	5.898		0	0	0
10.1007/s00521-015-2154-y	Complex neutrosophic set	NEURAL COMPUTING & APPLICATIONS	63	10	3	4.664		2	0	1
10.1016/j.cviu.2012.11.017	A survey of shaped-based registration and segmentation techniques for cardiac images	COMPUTER VISION AND IMAGE UNDERSTANDING	63	5.7	5	2.645		4	1	0
10.1007/s10994-011-5258-3	RE-EM trees: a data mining approach for longitudinal and clustered data	MACHINE LEARNING	63	4.5	3	2.809		2	0	0
10.1016/j.eswa.2009.05.059	A data driven ensemble classifier for credit scoring analysis	EXPERT SYSTEMS WITH APPLICATIONS	63	3	1	4.292		0	1	0
10.1016/j.eswa.2012.02.117	Automatic detection of crop rows in maize fields with high weeds pressure	EXPERT SYSTEMS WITH APPLICATIONS	63	3	1	4.292		0	1	0
10.1007/s10846-008-9253-2	Networking Issues for Small Unmanned Aircraft Systems	JOURNAL OF INTELLIGENT & ROBOTIC SYSTEMS	63	3	3	2.02		0	3	0
10.1016/j.media.2008.10.004	Phase unwrapping of MR images using Phi UN - A fast and robust region growing algorithm	MEDICAL IMAGE ANALYSIS	63	3	1	8.88		0	1	0
10.1016/j.neucom.2016.05.020	LED: A fast overlapping communities detection algorithm based on structural clustering	NEUROCOMPUTING	63	1	1	4.072		1	0	0
10.1016/j.artmed.2012.06.002	On mining clinical pathway patterns from medical behaviors	ARTIFICIAL INTELLIGENCE IN MEDICINE	63	1	3	3.574		3	0	0
10.1016/j.artint.2010.06.001	On the measure of conflicts: Shapley Inconsistency Values	ARTIFICIAL INTELLIGENCE	63	1	1	4.483		1	0	0
10.1016/j.imavis.2014.06.004	A review of recent advances in visual speech decoding	IMAGE AND VISION COMPUTING	63	0.5	1	2.733		1	0	0
10.1016/j.eswa.2015.05.013	Evaluating multiple classifiers for stock price direction prediction	EXPERT SYSTEMS WITH APPLICATIONS	63	0.5	1	4.292		1	0	0
10.1016/j.dss.2013.02.001	Exploring the effect of e-WOM participation on e-Loyalty in e-commerce	DECISION SUPPORT SYSTEMS	63	0.5	1	3.847		1	0	0
10.1016/j.eswa.2009.12.070	Cluster analysis using data mining approach to develop CRM methodology to assess the customer loyalty	EXPERT SYSTEMS WITH APPLICATIONS	63	0.25	1	4.292		0	0	0
10.1016/j.neucom.2017.04.070	Unsupervised real-time anomaly detection for streaming data	NEUROCOMPUTING	62	134.15	49	4.072		31	0	15
10.1016/j.patcog.2010.09.005	3D video and free viewpoint video-From capture to display	PATTERN RECOGNITION	62	6	4	5.898		0	4	0
10.1016/j.media.2012.02.008	Imaging the femoral cortex: Thickness density and mass from clinical CT	MEDICAL IMAGE ANALYSIS	62	6	2	8.88		0	2	0
10.1016/j.knosys.2008.03.015	Ontology-based context synchronization for ad hoc social collaborations	KNOWLEDGE-BASED SYSTEMS	62	6	12	5.101		0	12	0
10.1007/s00138-008-0152-0	The evolution of video surveillance: an overview	MACHINE VISION AND APPLICATIONS	62	6	9	1.788		0	9	0
10.1007/s10846-014-0041-x	A Practical Multirobot Localization System	JOURNAL OF INTELLIGENT & ROBOTIC SYSTEMS	62	4.85	3	2.02		2	0	0
10.1016/j.websem.2011.08.005	Where to publish and find ontologies? A survey of ontology libraries	JOURNAL OF WEB SEMANTICS	62	4.5	5	2.429		5	0	0
10.1016/j.media.2013.09.001	A collaborative resource to build consensus for automated left ventricular segmentation of cardiac MR images	MEDICAL IMAGE ANALYSIS	62	4	2	8.88		1	1	0
10.1016/j.patcog.2012.06.023	An efficient 3D face recognition approach based on the fusion of novel local low-level features	PATTERN RECOGNITION	62	3	1	5.898		0	1	0
10.1016/j.websem.2009.02.001	Bridging the gap between OWL and relational databases	JOURNAL OF WEB SEMANTICS	62	3	1	2.429		0	1	0
10.1016/j.patcog.2010.11.008	Designing efficient fusion schemes for multimodal biometric systems using face and palmprint	PATTERN RECOGNITION	62	3	1	5.898		0	1	0
10.1016/j.patcog.2008.06.002	Hough transform based fast skew detection and accurate skew correction methods	PATTERN RECOGNITION	62	3	1	5.898		0	1	0
10.1016/j.media.2007.10.009	Myocardial deformation recovery from cine MRI using a nearly incompressible biventricular model	MEDICAL IMAGE ANALYSIS	62	3	1	8.88		0	1	0
10.1016/j.neucom.2011.09.024	Sparse nonnegative matrix factorization with l(0)-constraints	NEUROCOMPUTING	62	3	1	4.072		0	1	0
10.1016/j.eswa.2008.01.025	Web-based CBR system applied to early cost budgeting for pavement maintenance project	EXPERT SYSTEMS WITH APPLICATIONS	62	3	1	4.292		0	0	0
10.1016/j.csl.2013.03.004	Comparative experiments using supervised learning and machine translation for multilingual sentiment analysis	COMPUTER SPEECH AND LANGUAGE	62	1.5	2	1.857		2	0	0
10.1016/j.media.2012.05.003	Super-resolution reconstruction to increase the spatial resolution of diffusion weighted images from orthogonal anisotropic acquisitions	MEDICAL IMAGE ANALYSIS	62	0.25	1	8.88		0	0	0
10.1016/j.asoc.2012.10.014	Neural networks to predict earthquakes in Chile	APPLIED SOFT COMPUTING	61	20.25	14	4.873		12	0	1
10.1016/j.neunet.2009.08.010	To spike or not to spike: A probabilistic spiking neuron model	NEURAL NETWORKS	61	14.116	6	5.785		1	4	0
10.1016/j.patcog.2012.10.023	Person authentication from neural activity of face-specific visual self-representation	PATTERN RECOGNITION	61	11	3	5.898		0	0	0
10.1016/j.media.2009.11.003	Segmentation of interwoven 3d tubular tree structures utilizing shape priors and graph cuts	MEDICAL IMAGE ANALYSIS	61	9	6	8.88		0	6	0
10.1007/s00138-011-0346-8	Efficient large-scale multi-view stereo for ultra high-resolution image sets	MACHINE VISION AND APPLICATIONS	61	6	5	1.788		0	5	0
10.1016/j.neunet.2012.09.003	Outline of a general theory of behavior and brain coordination	NEURAL NETWORKS	61	3.85	7	5.785		7	0	0
10.1007/s00521-013-1490-z	Predicting phishing websites based on self-structuring neural network	NEURAL COMPUTING & APPLICATIONS	61	3.25	22	4.664		13	0	0
10.1016/j.eswa.2009.06.034	A multi-objective decision-making process for reuse selection of historic buildings	EXPERT SYSTEMS WITH APPLICATIONS	61	3	1	4.292		0	0	0
10.1007/s11263-013-0664-6	Detection and Tracking of Occluded People	INTERNATIONAL JOURNAL OF COMPUTER VISION	61	3	2	6.071		0	2	0
10.1016/j.media.2010.01.006	Musculoskeletal MRI segmentation using multi-resolution simplex meshes with medial representations	MEDICAL IMAGE ANALYSIS	61	3	1	8.88		0	1	0
10.1016/j.imavis.2009.04.010	Robust and accurate iris segmentation in very noisy iris images	IMAGE AND VISION COMPUTING	61	3	1	2.733		0	1	0
10.1016/j.imavis.2010.04.002	Text detection in images using sparse representation with discriminative dictionaries	IMAGE AND VISION COMPUTING	61	3	2	2.733		0	2	0
10.1007/s00521-012-1026-y	Fast neural network learning algorithms for medical applications	NEURAL COMPUTING & APPLICATIONS	61	1	1	4.664		1	0	0
10.1016/j.imavis.2013.12.007	Nonverbal social withdrawal in depression: Evidence from manual and automatic analyses	IMAGE AND VISION COMPUTING	61	1	1	2.733		1	0	0
10.1016/j.eswa.2013.11.019	Reversible watermarking scheme for medical image based on differential evolution	EXPERT SYSTEMS WITH APPLICATIONS	61	1	2	4.292		2	0	0
10.1016/j.patrec.2014.07.019	An empirical evaluation of information metrics for low-rate and high-rate DDoS attack detection	PATTERN RECOGNITION LETTERS	61	0.75	2	2.81		1	0	0
10.1016/j.patcog.2016.03.008	A fast DBSCAN clustering algorithm by accelerating neighbor searching using Groups method	PATTERN RECOGNITION	61	0.5	1	5.898		1	0	0
10.1007/s12559-014-9313-9	Correlation Coefficients of Hesitant Fuzzy Sets and Their Application Based on Fuzzy Measures	COGNITIVE COMPUTATION	61	0.5	1	4.287		1	0	0
10.1007/s10846-008-9279-5	H-Infinity Static Output-feedback Control for Rotorcraft	JOURNAL OF INTELLIGENT & ROBOTIC SYSTEMS	61	0.5	2	2.02		0	0	0
10.1007/s10994-013-5413-0	Interactive topic modeling	MACHINE LEARNING	61	0.5	1	2.809		1	0	0
10.1016/j.eswa.2013.05.070	A study of TODIM in a intuitionistic fuzzy and random environment	EXPERT SYSTEMS WITH APPLICATIONS	61	0.25	1	4.292		0	0	0
10.1007/s10846-011-9591-3	MM-UAV: Mobile Manipulating Unmanned Aerial Vehicle	JOURNAL OF INTELLIGENT & ROBOTIC SYSTEMS	60	29.08	4	2.02		0	0	2
10.1007/s00138-015-0737-3	Leaf segmentation in plant phenotyping: a collation study	MACHINE VISION AND APPLICATIONS	60	14.58	5	1.788		2	2	0
10.1016/j.aei.2008.06.006	Implementing information systems with project teams using ethnographic-action research	ADVANCED ENGINEERING INFORMATICS	60	9	3	3.772		0	1	0
10.1016/j.imavis.2009.04.001	A new iris segmentation method for non-ideal iris images	IMAGE AND VISION COMPUTING	60	6	2	2.733		0	2	0
10.1007/s10994-009-5165-z	Random classification noise defeats all convex potential boosters	MACHINE LEARNING	60	6	3	2.809		0	2	0
10.1007/s10994-011-5273-4	Visualizing non-metric similarities in multiple maps	MACHINE LEARNING	60	5	3	2.809		1	1	0
10.1007/s10514-008-9104-9	Evolved swarming without positioning information: an application in aerial communication relay	AUTONOMOUS ROBOTS	60	4	2	3.634		1	0	0
10.1016/j.patcog.2007.11.025	1D-LDA vs. 2D-LDA: When is vector-based linear discriminant analysis better than matrix-based?	PATTERN RECOGNITION	60	3	1	5.898		0	1	0
10.1016/j.websem.2009.09.001	An efficient and scalable algorithm for segmented alignment of ontologies of arbitrary size	JOURNAL OF WEB SEMANTICS	60	3	1	2.429		0	1	0
10.1007/s10115-008-0150-6	Characterization and evaluation of similarity measures for pairs of clusterings	KNOWLEDGE AND INFORMATION SYSTEMS	60	3	1	2.397		0	0	0
10.1016/j.eswa.2014.01.025	Fast mining frequent itemsets using Nodesets	EXPERT SYSTEMS WITH APPLICATIONS	60	3	1	4.292		0	0	0
10.1016/j.asoc.2007.02.010	Fuzzy polynomial neural networks for approximation of the compressive strength of concrete	APPLIED SOFT COMPUTING	60	3	1	4.873		0	0	0
10.1016/j.datak.2009.02.009	On managing business processes variants	DATA & KNOWLEDGE ENGINEERING	60	3	1	1.583		0	1	0
10.1016/j.neucom.2012.02.040	Regularized extreme learning machine for regression with missing data	NEUROCOMPUTING	60	3	1	4.072		0	1	0
10.1016/j.asoc.2015.09.040	Artificial neural networks in business: Two decades of research	APPLIED SOFT COMPUTING	60	1.5	2	4.873		2	0	0
10.1007/s11263-016-0911-8	Visualizing Deep Convolutional Neural Networks Using Natural Pre-images	INTERNATIONAL JOURNAL OF COMPUTER VISION	60	1	5	6.071		5	0	0
10.1016/j.dss.2014.05.010	What can crowdsourcing do for decision support?	DECISION SUPPORT SYSTEMS	60	0.75	2	3.847		1	0	0
10.1016/j.asoc.2011.10.023	A comparative study between dynamic adapted PSO and VNS for the vehicle routing problem with dynamic requests	APPLIED SOFT COMPUTING	60	0.5	2	4.873		2	0	0
10.1016/j.eswa.2014.08.019	An integrated approach for supplier portfolio selection: Lean or agile?	EXPERT SYSTEMS WITH APPLICATIONS	60	0.5	1	4.292		1	0	0
10.1016/j.neucom.2013.05.051	Boosting weighted ELM for imbalanced learning	NEUROCOMPUTING	60	0.25	1	4.072		0	0	0
10.1016/j.imavis.2013.12.004	Face detection by structural models	IMAGE AND VISION COMPUTING	60	0.25	1	2.733		1	0	0
10.1016/j.patcog.2010.01.005	Texture measures combination for improved meningioma classification of histopathological images	PATTERN RECOGNITION	60	0.25	1	5.898		1	0	0
10.1016/j.asoc.2014.08.026	A learning-guided multi-objective evolutionary algorithm for constrained portfolio optimization	APPLIED SOFT COMPUTING	59	34.88	29	4.873		25	0	3
10.1016/j.aei.2013.11.002	Vision-based material recognition for automated monitoring of construction progress and generating building information modeling from unordered site image collections	ADVANCED ENGINEERING INFORMATICS	59	6.816	1	3.772		0	0	0
10.1016/j.patcog.2010.01.010	Individual tooth segmentation from CT images using level set method with shape and intensity prior	PATTERN RECOGNITION	59	6	3	5.898		0	3	0
10.1016/j.imavis.2009.04.005	Level-set segmentation of brain tumors using a threshold-based speed function	IMAGE AND VISION COMPUTING	59	6	2	2.733		0	2	0
10.1016/j.eswa.2010.08.052	Online joint palmprint and palmvein verification	EXPERT SYSTEMS WITH APPLICATIONS	59	6	2	4.292		0	2	0
10.1016/j.media.2010.04.008	Atlas-based whole-body segmentation of mice from low-contrast Micro-CT data	MEDICAL IMAGE ANALYSIS	59	3	2	8.88		0	2	0
10.1016/j.patcog.2009.04.026	Robust palmprint verification using 2D and 3D features	PATTERN RECOGNITION	59	3	1	5.898		0	1	0
10.1007/s10994-012-5279-6	Scalable and efficient multi-label classification for evolving data streams	MACHINE LEARNING	59	3	2	2.809		0	0	0
10.1016/j.eswa.2012.04.058	Sensor-driven agenda for intelligent home care of the elderly	EXPERT SYSTEMS WITH APPLICATIONS	59	3	2	4.292		0	2	0
10.1016/j.patrec.2008.05.015	Video sequence matching based on temporal ordinal measurement	PATTERN RECOGNITION LETTERS	59	3	4	2.81		0	4	0
10.1137/110854989	A Low Patch-Rank Interpretation of Texture	SIAM JOURNAL ON IMAGING SCIENCES	59	1	1	2.514		1	0	0
10.1016/j.eswa.2010.09.048	Parallelized genetic ant colony systems for solving the traveling salesman problem	EXPERT SYSTEMS WITH APPLICATIONS	59	0.5	2	4.292		2	0	0
10.1016/j.patrec.2013.08.028	Spatial-based skin detection using discriminative skin-presence features	PATTERN RECOGNITION LETTERS	59	0.5	1	2.81		1	0	0
10.1016/j.bdr.2015.02.006	Demystifying Big Data Analytics for Business Intelligence Through the Lens of Marketing Mix	BIG DATA RESEARCH	58	77.83	16	2.952		5	0	8
10.1007/s10115-011-0463-8	Data preprocessing techniques for classification without discrimination	KNOWLEDGE AND INFORMATION SYSTEMS	58	20.08	6	2.397		1	0	0
10.1016/j.neunet.2011.11.001	Asynchronous frameless event-based optical flow	NEURAL NETWORKS	58	13.6	8	5.785		4	4	0
10.1016/j.media.2011.05.003	Registration of 3D trans-esophageal echocardiography to X-ray fluoroscopy using image-based probe tracking	MEDICAL IMAGE ANALYSIS	58	10	6	8.88		0	5	0
10.1007/s10994-008-5079-1	Structured machine learning: the next ten years	MACHINE LEARNING	58	8.264	3	2.809		2	0	0
10.1007/s11263-007-0125-1	Pose robust face tracking by combining active appearance models and cylinder head models	INTERNATIONAL JOURNAL OF COMPUTER VISION	58	6	3	6.071		0	3	0
10.1016/j.media.2016.10.010	Deep learning for automated skeletal bone age assessment in X-ray images	MEDICAL IMAGE ANALYSIS	58	3.1	5	8.88		4	0	0
10.1016/j.patrec.2014.03.023	3D reconstruction methods for digital preservation of cultural heritage: A survey	PATTERN RECOGNITION LETTERS	58	3	1	2.81		0	0	0
10.1007/s11263-010-0409-8	Coded Aperture Pairs for Depth from Defocus and Defocus Deblurring	INTERNATIONAL JOURNAL OF COMPUTER VISION	58	3	3	6.071		0	3	0
10.1007/s11263-012-0529-4	Improving Image Classification Using Semantic Attributes	INTERNATIONAL JOURNAL OF COMPUTER VISION	58	3	1	6.071		0	1	0
10.1016/j.eswa.2006.12.028	Introducing a decision tree-based indoor positioning technique	EXPERT SYSTEMS WITH APPLICATIONS	58	3	1	4.292		0	1	0
10.1016/j.neucom.2008.04.030	Modeling word perception using the Elman network	NEUROCOMPUTING	58	3	2	4.072		0	0	0
10.1016/j.eswa.2007.06.023	Predicting stock index increments by neural networks: The role of trading volume under different horizons	EXPERT SYSTEMS WITH APPLICATIONS	58	3	1	4.292		0	1	0
10.1016/j.patcog.2012.02.032	Silhouette-based gait recognition using Procrustes shape analysis and elliptic Fourier descriptors	PATTERN RECOGNITION	58	3	1	5.898		0	1	0
10.1016/j.asoc.2014.11.028	Investment project evaluation by a decision making methodology based on type-2 fuzzy sets	APPLIED SOFT COMPUTING	58	1.85	2	4.873		2	0	0
10.1016/j.patcog.2013.07.018	An efficient 3D face recognition approach using local geometrical signatures	PATTERN RECOGNITION	58	1	1	5.898		0	0	0
10.1016/j.asoc.2012.01.002	Another view on reduction of parameters in soft sets	APPLIED SOFT COMPUTING	58	1	1	4.873		1	0	0
10.1016/j.artint.2010.01.001	Democratic instance selection: A linear complexity instance selection algorithm based on classifier ensemble concepts	ARTIFICIAL INTELLIGENCE	58	1	1	4.483		1	0	0
10.1016/j.media.2014.08.003	Self-gated MRI motion modeling for respiratory motion compensation in integrated PET/MRI	MEDICAL IMAGE ANALYSIS	58	1	1	8.88		1	0	0
10.1007/s11263-012-0607-7	A Variational Approach to Video Registration with Subspace Constraints	INTERNATIONAL JOURNAL OF COMPUTER VISION	58	0.5	1	6.071		1	0	0
10.1016/j.eswa.2011.11.117	Enhanced parallel cat swarm optimization based on the Taguchi method	EXPERT SYSTEMS WITH APPLICATIONS	58	0.5	1	4.292		1	0	0
10.1016/j.eswa.2014.02.026	Learned lessons in credit card fraud detection from a practitioner perspective	EXPERT SYSTEMS WITH APPLICATIONS	58	0.5	1	4.292		1	0	0
10.1016/j.eswa.2008.08.050	Genetic algorithm based neural network approaches for predicting churn in cellular wireless network services	EXPERT SYSTEMS WITH APPLICATIONS	58	0.25	1	4.292		0	0	0
10.1016/j.neunet.2010.09.005	Social robots are psychological agents for infants: A test of gaze following	NEURAL NETWORKS	57	7.556	2	5.785		1	0	0
10.1016/j.eswa.2007.08.001	An empirical validation of a neural network model for software effort estimation	EXPERT SYSTEMS WITH APPLICATIONS	57	6.25	7	4.292		0	6	0
10.1007/s10846-011-9616-y	Automatic Battery Replacement System for UAVs: Analysis and Design	JOURNAL OF INTELLIGENT & ROBOTIC SYSTEMS	57	6	3	2.02		0	3	0
10.1016/j.websem.2007.11.002	Bridging the semantic Web and Web 2.0 with Representational State Transfer (REST)	JOURNAL OF WEB SEMANTICS	57	6	6	2.429		0	6	0
10.1016/j.imavis.2008.10.012	An edge-based color-aided method for license plate detection	IMAGE AND VISION COMPUTING	57	3	1	2.733		0	1	0
10.1016/j.eswa.2008.02.014	Building and evaluating a location-based service recommendation system with a preference adjustment mechanism	EXPERT SYSTEMS WITH APPLICATIONS	57	3	2	4.292		0	2	0
10.1002/int.20449	Diet Assessment Based on Type-2 Fuzzy Ontology and Fuzzy Markup Language	INTERNATIONAL JOURNAL OF INTELLIGENT SYSTEMS	57	3	1	7.229		0	0	0
10.1016/j.dss.2007.10.010	Improving customer complaint management by automatic email classification using linguistic style features as predictors	DECISION SUPPORT SYSTEMS	57	3	1	3.847		0	0	0
10.1016/j.cviu.2009.08.003	Parasite detection and identification for automated thin blood film malaria diagnosis	COMPUTER VISION AND IMAGE UNDERSTANDING	57	3	1	2.645		0	1	0
10.1145/1961189.1961198	PLDA+: Parallel Latent Dirichlet Allocation with Data Placement and Pipeline Processing	ACM TRANSACTIONS ON INTELLIGENT SYSTEMS AND TECHNOLOGY	57	3	1	2.861		0	1	0
10.1007/s10115-007-0073-7	Privacy-preserving SVM classification	KNOWLEDGE AND INFORMATION SYSTEMS	57	3	1	2.397		0	1	0
10.1016/j.patrec.2014.06.011	Revisiting the Fisher vector for fine-grained classification	PATTERN RECOGNITION LETTERS	57	3	1	2.81		0	1	0
10.1016/j.eswa.2009.01.062	Using BPNN and DEMATEL to modify importance-performance analysis model - A study of the computer industry	EXPERT SYSTEMS WITH APPLICATIONS	57	3	1	4.292		0	1	0
10.1016/j.patrec.2013.03.022	Framework for reliable real-time facial expression recognition for low resolution images	PATTERN RECOGNITION LETTERS	57	2.2	3	2.81		3	0	0
10.1016/j.neucom.2013.04.017	Active deep learning method for semi-supervised sentiment classification	NEUROCOMPUTING	57	2	3	4.072		3	0	0
10.1016/j.eswa.2013.12.027	Pulse coupled neural networks and its applications	EXPERT SYSTEMS WITH APPLICATIONS	57	1.25	2	4.292		1	0	0
10.1007/s10618-014-0356-z	Survey on distance metric learning and dimensionality reduction in data mining	DATA MINING AND KNOWLEDGE DISCOVERY	57	1	1	2.879		0	0	0
10.1007/s10514-015-9429-0	Collision avoidance for aerial vehicles in multi-agent scenarios	AUTONOMOUS ROBOTS	57	0.75	2	3.634		1	0	0
10.1016/j.dss.2013.04.002	Bayesian Probabilistic Matrix Factorization with Social Relations and Item Contents for recommendation	DECISION SUPPORT SYSTEMS	57	0.5	1	3.847		1	0	0
10.1016/j.artmed.2013.08.003	Brain Painting: Usability testing according to the user-centered design in end users with severe motor paralysis	ARTIFICIAL INTELLIGENCE IN MEDICINE	57	0.5	1	3.574		1	0	0
10.1016/j.asoc.2011.05.023	An ant colony optimization algorithm with improved pheromone correction strategy for the minimum weight vertex cover problem	APPLIED SOFT COMPUTING	57	0.25	1	4.873		0	0	0
10.1007/s11023-015-9367-9	Nudge Versus Boost: How Coherent are Policy and Theory?	MINDS AND MACHINES	56	37.124	12	1.4		8	0	2
10.3389/fnbot.2017.00006	Hybrid EEG-fNIRS-Based Eight-Command Decoding for BCI: Application to Quadcopter Control	FRONTIERS IN NEUROROBOTICS	56	12.8	21	3		21	0	0
10.1016/j.knosys.2014.04.039	Enriching semantic knowledge bases for opinion mining in big data applications	KNOWLEDGE-BASED SYSTEMS	56	10.55	22	5.101		16	0	0
10.1016/j.patcog.2009.12.006	Tone-mapping high dynamic range images by novel histogram adjustment	PATTERN RECOGNITION	56	9	9	5.898		0	9	0
10.1016/j.imavis.2009.04.017	A highly accurate and computationally efficient approach for unconstrained iris segmentation	IMAGE AND VISION COMPUTING	56	6	4	2.733		0	4	0
10.1007/s10846-011-9571-7	Combining Stereo Vision and Inertial Navigation System for a Quad-Rotor UAV	JOURNAL OF INTELLIGENT & ROBOTIC SYSTEMS	56	6	2	2.02		0	2	0
10.1016/j.websem.2009.02.002	Extending SPARQL with regular expression patterns (for querying RDF)	JOURNAL OF WEB SEMANTICS	56	6	4	2.429		0	4	0
10.1016/j.eswa.2011.09.160	Comparison of term frequency and document frequency based feature selection metrics in text categorization	EXPERT SYSTEMS WITH APPLICATIONS	56	3	1	4.292		0	1	0
10.1016/j.neucom.2009.12.007	Composite function wavelet neural networks with extreme learning machine	NEUROCOMPUTING	56	3	1	4.072		0	0	0
10.1007/s10994-009-5102-1	Efficient covariance matrix update for variable metric evolution strategies	MACHINE LEARNING	56	3	2	2.809		0	2	0
10.1049/iet-ipr.2011.0534	Image zooming using directional cubic convolution interpolation	IET IMAGE PROCESSING	56	3	2	2.004		0	2	0
10.1007/s11263-007-0064-x	Learning layered motion segmentations of video	INTERNATIONAL JOURNAL OF COMPUTER VISION	56	3	1	6.071		0	1	0
10.1016/j.media.2008.06.016	Motion-guided segmentation for cine DENSE MRI	MEDICAL IMAGE ANALYSIS	56	3	1	8.88		0	1	0
10.1016/j.neucom.2007.07.028	Support vector machine classification for large data sets via minimum enclosing ball clustering	NEUROCOMPUTING	56	3	1	4.072		0	1	0
10.1016/j.eswa.2013.08.073	Text-based emotion classification using emotion cause extraction	EXPERT SYSTEMS WITH APPLICATIONS	56	3	1	4.292		0	1	0
10.1016/j.eswa.2010.09.028	Comparing performances of backpropagation and genetic algorithms in the data classification	EXPERT SYSTEMS WITH APPLICATIONS	56	1.35	6	4.292		5	0	0
10.1016/j.eswa.2009.06.047	Iterated variable neighborhood descent algorithm for the capacitated vehicle routing problem	EXPERT SYSTEMS WITH APPLICATIONS	56	0.5	1	4.292		1	0	0
10.1007/s10514-007-9069-0	A vision-based autopilot for a miniature air vehicle: joint speed control and lateral obstacle avoidance	AUTONOMOUS ROBOTS	56	0.25	1	3.634		1	0	0
10.1016/j.eswa.2014.03.024	Detecting criminal organizations in mobile phone networks	EXPERT SYSTEMS WITH APPLICATIONS	55	95.226	87	4.292		81	0	3
10.1016/j.websem.2012.08.001	FaBiO and CiTO: Ontologies for describing bibliographic resources and citations	JOURNAL OF WEB SEMANTICS	55	32.58	17	2.429		11	0	1
10.1016/j.imavis.2005.07.027	Ontology based complex object recognition	IMAGE AND VISION COMPUTING	55	6.064	1	2.733		0	0	0
10.1016/j.neucom.2007.12.027	Delay learning and polychronization for reservoir computing	NEUROCOMPUTING	55	6	8	4.072		0	8	0
10.1016/j.asoc.2010.08.001	PCA and ICA processing methods for removal of artifacts and noise in electrocardiograms: A survey and comparison	APPLIED SOFT COMPUTING	55	6	3	4.873		0	3	0
10.1016/j.eswa.2015.10.043	Selecting patterns and features for between- and within-crop-row weed mapping using UAV-imagery	EXPERT SYSTEMS WITH APPLICATIONS	55	4.4	6	4.292		6	0	0
10.1016/j.patrec.2008.08.013	Curve matching for open 2D curves	PATTERN RECOGNITION LETTERS	55	4	3	2.81		1	2	0
10.1016/j.knosys.2013.08.025	A hybrid method using experiment design and grey relational analysis for multiple criteria decision making problems	KNOWLEDGE-BASED SYSTEMS	55	3	4	5.101		0	0	0
10.1007/s10514-009-9113-3	Finding multiple lanes in urban road networks with vision and lidar	AUTONOMOUS ROBOTS	55	3	1	3.634		0	1	0
10.1007/s11263-009-0293-2	Guest Editorial: State of the Art in Image- and Video-Based Human Pose and Motion Estimation	INTERNATIONAL JOURNAL OF COMPUTER VISION	55	3	3	6.071		0	3	0
10.1016/j.patrec.2015.11.015	Local Deep Neural Networks for gender recognition	PATTERN RECOGNITION LETTERS	55	3	4	2.81		2	0	0
10.1016/j.eswa.2009.10.041	Optimal MLP neural network classifier for fault detection of three phase induction motor	EXPERT SYSTEMS WITH APPLICATIONS	55	3	1	4.292		0	1	0
10.1016/j.patrec.2007.07.019	ROC analysis in ordinal regression learning	PATTERN RECOGNITION LETTERS	55	3	1	2.81		0	0	0
10.1016/j.websem.2014.02.001	Streaming the Web: Reasoning over dynamic data	JOURNAL OF WEB SEMANTICS	55	3	1	2.429		0	1	0
10.1016/j.artint.2014.11.001	Subdimensional expansion for multirobot path planning	ARTIFICIAL INTELLIGENCE	55	3	2	4.483		0	2	0
10.1007/s10618-009-0156-z	Time to CARE: a collaborative engine for practical disease prediction	DATA MINING AND KNOWLEDGE DISCOVERY	55	3	1	2.879		0	1	0
10.1016/j.datak.2007.10.007	Towards portable natural language interfaces to knowledge bases - The case of the ORAKEL system	DATA & KNOWLEDGE ENGINEERING	55	3	1	1.583		0	1	0
10.1145/1921641.1921646	Trustworthy Service Selection and Composition	ACM TRANSACTIONS ON AUTONOMOUS AND ADAPTIVE SYSTEMS	55	3	1	2.66		0	1	0
10.1016/j.websem.2011.06.002	TWC LOGD: A portal for linked open government data ecosystems	JOURNAL OF WEB SEMANTICS	55	3	4	2.429		0	4	0
10.1016/j.knosys.2011.06.014	Community detection based on a semantic network	KNOWLEDGE-BASED SYSTEMS	55	2	2	5.101		2	0	0
10.1016/j.asoc.2014.09.041	Evolutionary optimization for disaster relief operations: A survey	APPLIED SOFT COMPUTING	55	1.5	3	4.873		3	0	0
10.1016/j.eswa.2014.08.036	A multi-label classification based approach for sentiment classification	EXPERT SYSTEMS WITH APPLICATIONS	55	1	1	4.292		0	0	0
10.1016/j.eswa.2011.08.123	EOG-based eye movements codification for human computer interaction	EXPERT SYSTEMS WITH APPLICATIONS	55	1	1	4.292		1	0	0
10.1016/j.eswa.2009.07.021	The open vehicle routing problem with fuzzy demands	EXPERT SYSTEMS WITH APPLICATIONS	55	0.75	2	4.292		2	0	0
10.1016/j.media.2015.04.015	Discriminative dictionary learning for abdominal multi-organ segmentation	MEDICAL IMAGE ANALYSIS	55	0.5	1	8.88		1	0	0
10.1007/s13042-015-0461-3	Interval-valued neutrosophic soft sets and its decision making	INTERNATIONAL JOURNAL OF MACHINE LEARNING AND CYBERNETICS	55	0.5	2	3.844		2	0	0
10.1016/j.patcog.2012.01.001	A comparative study of thermal face recognition methods in unconstrained environments	PATTERN RECOGNITION	55	0.25	1	5.898		1	0	0
10.1007/s10994-013-5415-y	Manifestations of user personality in website choice and behaviour on online social networks	MACHINE LEARNING	54	27	3	2.809		0	0	3
10.1016/j.knosys.2012.01.007	A novel measure of edge centrality in social networks	KNOWLEDGE-BASED SYSTEMS	54	7.35	11	5.101		9	1	0
10.1016/j.neunet.2013.02.003	A supervised multi-spike learning algorithm based on gradient descent for spiking neural networks	NEURAL NETWORKS	54	6	3	5.785		0	3	0
10.1016/j.patrec.2007.11.011	On-line handwritten digit recognition based on trajectory and velocity modeling	PATTERN RECOGNITION LETTERS	54	6	4	2.81		0	4	0
10.1016/j.media.2012.09.007	Spine detection in CT and MR using iterated marginal space learning	MEDICAL IMAGE ANALYSIS	54	6	2	8.88		0	2	0
10.1016/j.media.2011.02.002	Recent advances in diffusion MRI modeling: Angular and radial reconstruction	MEDICAL IMAGE ANALYSIS	54	5	4	8.88		3	1	0
10.1016/j.artmed.2008.07.019	Adaptive resource allocation for efficient patient scheduling	ARTIFICIAL INTELLIGENCE IN MEDICINE	54	3	1	3.574		0	1	0
10.1007/s10845-012-0682-1	Bead geometry prediction for robotic GMAW-based rapid manufacturing through a neural network and a second-order regression analysis	JOURNAL OF INTELLIGENT MANUFACTURING	54	3	2	3.535		0	2	0
10.1016/j.patrec.2007.10.026	Color image segmentation: Rough-set theoretic approach	PATTERN RECOGNITION LETTERS	54	3	1	2.81		0	1	0
10.1016/j.cviu.2007.09.016	Content based video matching using spatiotemporal volumes	COMPUTER VISION AND IMAGE UNDERSTANDING	54	3	1	2.645		0	1	0
10.1016/j.neucom.2013.01.033	Decision fusion of sparse representation and support vector machine for SAR image target recognition	NEUROCOMPUTING	54	3	1	4.072		0	1	0
10.1016/j.artint.2008.12.005	Efficient duration and hierarchical modeling for human activity recognition	ARTIFICIAL INTELLIGENCE	54	3	2	4.483		0	2	0
10.1016/j.eswa.2012.01.091	Prediction of parking space availability in real time	EXPERT SYSTEMS WITH APPLICATIONS	54	3	2	4.292		0	2	0
10.1016/j.knosys.2014.04.035	An empirical evaluation of similarity measures for time series classification	KNOWLEDGE-BASED SYSTEMS	54	2.5	5	5.101		5	0	0
10.1049/iet-bmt.2011.0012	Security evaluation of biometric authentication systems under real spoofing attacks	IET BIOMETRICS	54	1.5	2	2.092		2	0	0
10.1016/j.eswa.2012.12.084	Sentiment polarity detection in Spanish reviews combining supervised and unsupervised approaches	EXPERT SYSTEMS WITH APPLICATIONS	54	1.5	4	4.292		4	0	0
10.1016/j.knosys.2013.10.016	Speeding up incremental wrapper feature subset selection with Naive Bayes classifier	KNOWLEDGE-BASED SYSTEMS	54	1	1	5.101		1	0	0
10.1016/j.media.2015.06.009	Abdominal multi-organ segmentation from CT images using conditional shape-location and unsupervised intensity priors	MEDICAL IMAGE ANALYSIS	54	0.5	2	8.88		1	0	0
10.1016/j.eswa.2011.02.046	Evolving neural network using real coded genetic algorithm for permeability estimation of the reservoir	EXPERT SYSTEMS WITH APPLICATIONS	54	0.25	8	4.292		8	0	0
10.1613/jair.2627	The Computational Complexity of Dominance and Consistency in CP-Nets	JOURNAL OF ARTIFICIAL INTELLIGENCE RESEARCH	54	0.25	1	1.82		1	0	0
10.1016/j.neucom.2015.04.025	Brainprint: Assessing the uniqueness collectability and permanence of a novel method for ERP biometrics	NEUROCOMPUTING	53	363.394	61	4.072		10	0	33
10.1016/j.eswa.2009.02.086	Semantic business process integration based on ontology alignment	EXPERT SYSTEMS WITH APPLICATIONS	53	6	2	4.292		0	2	0
10.1016/j.media.2012.07.005	Ultrasound confidence maps using random walks	MEDICAL IMAGE ANALYSIS	53	6	2	8.88		0	2	0
10.1007/s10618-013-0306-1	Repeated labeling using multiple noisy labelers	DATA MINING AND KNOWLEDGE DISCOVERY	53	5.5	5	2.879		4	1	0
10.1016/j.knosys.2013.12.023	An ensemble-based system for automatic screening of diabetic retinopathy	KNOWLEDGE-BASED SYSTEMS	53	4.85	6	5.101		5	0	0
10.1002/int.20420	On Aggregating Uncertain Information by Type-2 OWA Operators for Soft Decision Making	INTERNATIONAL JOURNAL OF INTELLIGENT SYSTEMS	53	4.5	7	7.229		6	0	0
10.1007/s11263-015-0806-0	3D Scene Flow Estimation with a Piecewise Rigid Scene Model	INTERNATIONAL JOURNAL OF COMPUTER VISION	53	3	1	6.071		0	1	0
10.1007/s10514-007-9050-y	A line feature based SLAM with low grade range sensors using geometric constraints and active exploration for mobile robot	AUTONOMOUS ROBOTS	53	3	2	3.634		0	2	0
10.1007/s11263-008-0134-8	Carved Visual Hulls for Image-Based Modeling	INTERNATIONAL JOURNAL OF COMPUTER VISION	53	3	1	6.071		0	1	0
10.1016/j.inffus.2010.09.003	Fusion of multispectral and panchromatic images based on support value transform and adaptive principal component analysis	INFORMATION FUSION	53	3	2	10.716		0	2	0
10.1007/s10846-014-0024-y	Manipulator Performance Measures - A Comprehensive Literature Survey	JOURNAL OF INTELLIGENT & ROBOTIC SYSTEMS	53	3	1	2.02		0	1	0
10.1016/j.aei.2008.07.002	Towards automated progress assessment of workpackage components in construction projects using computer vision	ADVANCED ENGINEERING INFORMATICS	53	3	1	3.772		0	1	0
10.1016/j.ijar.2010.05.004	AFRA: Argumentation framework with recursive attacks	INTERNATIONAL JOURNAL OF APPROXIMATE REASONING	53	2	7	1.982		7	0	0
10.1016/j.eswa.2011.08.007	An improved self-adaptive PSO technique for short-term hydrothermal scheduling	EXPERT SYSTEMS WITH APPLICATIONS	53	2	3	4.292		3	0	0
10.1016/j.swevo.2015.10.007	Self-adaptive control parameters' randomization frequency and propagations in differential evolution	SWARM AND EVOLUTIONARY COMPUTATION	53	1.85	3	6.33		3	0	0
10.1016/j.eswa.2014.04.026	A genetic algorithm approach for SMEs bankruptcy prediction: Empirical evidence from Italy	EXPERT SYSTEMS WITH APPLICATIONS	53	1.35	4	4.292		4	0	0
10.1016/j.websem.2013.05.006	Evaluating question answering over linked data	JOURNAL OF WEB SEMANTICS	53	1	1	2.429		1	0	0
10.1016/j.inffus.2014.03.006	Fault detection in multi-sensor networks based on multivariate time-series models and orthogonal transformations	INFORMATION FUSION	53	1	1	10.716		1	0	0
10.1007/s11263-010-0415-x	Interactively Co-segmentating Topically Related Images with Intelligent Scribble Guidance	INTERNATIONAL JOURNAL OF COMPUTER VISION	53	1	1	6.071		1	0	0
10.1007/s10514-015-9476-6	Momentum control with hierarchical inverse dynamics on a torque-controlled humanoid	AUTONOMOUS ROBOTS	53	1	3	3.634		1	0	0
10.1016/j.eswa.2012.01.211	Flexible job shop scheduling with parallel machines using Genetic Algorithm and Grouping Genetic Algorithm	EXPERT SYSTEMS WITH APPLICATIONS	53	0.5	1	4.292		1	0	0
10.1016/j.knosys.2017.09.010	Solving multi-criteria group decision making problems under environments with a high number of alternatives using fuzzy ontologies and multi-granular linguistic modelling methods	KNOWLEDGE-BASED SYSTEMS	53	0.5	1	5.101		1	0	0
10.1007/s11263-010-0355-5	Stochastic Representation and Recognition of High-Level Group Activities	INTERNATIONAL JOURNAL OF COMPUTER VISION	53	0.5	1	6.071		1	0	0
10.1016/j.patcog.2013.08.008	Eye pupil localization with an ensemble of randomized trees	PATTERN RECOGNITION	53	0.25	1	5.898		0	0	0
10.1016/j.eswa.2008.09.049	Short-term stock price prediction based on echo state networks	EXPERT SYSTEMS WITH APPLICATIONS	52	27.08	4	4.292		0	0	3
10.1016/j.eswa.2014.11.025	Bankruptcy visualization and prediction using neural networks: A study of US commercial banks	EXPERT SYSTEMS WITH APPLICATIONS	52	19.192	6	4.292		2	0	1
10.1016/j.bdr.2015.01.005	Big Data and Science: Myths and Reality	BIG DATA RESEARCH	52	15.4	27	2.952		26	0	0
10.1016/j.neucom.2016.10.024	Brain computer interface: control signals review	NEUROCOMPUTING	52	12	3	4.072		2	0	0
10.1016/j.artmed.2016.01.004	Evaluation of handwriting kinematics and pressure for differential diagnosis of Parkinson's disease	ARTIFICIAL INTELLIGENCE IN MEDICINE	52	8.33	6	3.574		2	0	0
10.1007/s10514-011-9228-1	Data-driven grasping	AUTONOMOUS ROBOTS	52	6	2	3.634		0	2	0
10.1016/j.media.2008.02.002	Regions systems and the brain: Hierarchical measures of functional integration in fMRI	MEDICAL IMAGE ANALYSIS	52	6	2	8.88		0	1	0
10.1016/j.patrec.2010.02.004	A person independent system for recognition of hand postures used in sign language	PATTERN RECOGNITION LETTERS	52	3	1	2.81		0	1	0
10.1016/j.patcog.2008.01.006	A writer identification system for on-line whiteboard data	PATTERN RECOGNITION	52	3	1	5.898		0	0	0
10.1016/j.eswa.2011.05.011	An effective hybrid biogeography-based optimization algorithm for parameter estimation of chaotic systems	EXPERT SYSTEMS WITH APPLICATIONS	52	3	1	4.292		0	0	0
10.1016/j.eswa.2010.06.069	Analyzing the performance of fuzzy cognitive maps with non-linear hebbian learning algorithm in predicting autistic disorder	EXPERT SYSTEMS WITH APPLICATIONS	52	3	2	4.292		0	2	0
10.1016/j.artmed.2011.06.004	Automatic sleep scoring: A search for an optimal combination of measures	ARTIFICIAL INTELLIGENCE IN MEDICINE	52	3	1	3.574		0	0	0
10.1016/j.patrec.2007.10.009	Classifying EEG for brain computer interfaces using Gaussian processes	PATTERN RECOGNITION LETTERS	52	3	1	2.81		0	1	0
10.1016/j.imavis.2009.06.009	Colour texture and motion in level set based segmentation and tracking	IMAGE AND VISION COMPUTING	52	3	1	2.733		0	1	0
10.1007/s11263-011-0465-8	Efficient Video Rectification and Stabilisation for Cell-Phones	INTERNATIONAL JOURNAL OF COMPUTER VISION	52	3	3	6.071		0	3	0
10.1016/j.knosys.2008.03.051	Feature selection based-on genetic algorithm for image annotation	KNOWLEDGE-BASED SYSTEMS	52	3	3	5.101		0	3	0
10.1016/j.dss.2012.05.023	Feature selection for sentiment analysis based on content and syntax models	DECISION SUPPORT SYSTEMS	52	3	1	3.847		0	1	0
10.1016/j.eswa.2008.02.063	Fuzzy neural based importance-performance analysis for determining critical service attributes	EXPERT SYSTEMS WITH APPLICATIONS	52	3	1	4.292		0	1	0
10.1080/08839514.2010.492259	MAINTAINING ENGAGEMENT IN LONG-TERM INTERVENTIONS WITH RELATIONAL AGENTS	APPLIED ARTIFICIAL INTELLIGENCE	52	3	1	0.988		0	0	0
10.1016/j.media.2011.11.008	Manifold learning for image-based breathing gating in ultrasound and MRI	MEDICAL IMAGE ANALYSIS	52	3	1	8.88		0	1	0
10.1007/s11263-011-0507-2	Object Recognition by Sequential Figure-Ground Ranking	INTERNATIONAL JOURNAL OF COMPUTER VISION	52	3	1	6.071		0	1	0
10.1016/j.aei.2009.08.005	Product design knowledge management based on design structure matrix	ADVANCED ENGINEERING INFORMATICS	52	3	1	3.772		0	1	0
10.1007/s11263-009-0219-z	Registration of Anatomical Images Using Paths of Diffeomorphisms Parameterized with Stationary Vector Field Flows	INTERNATIONAL JOURNAL OF COMPUTER VISION	52	3	1	6.071		0	1	0
10.1016/j.neucom.2016.06.014	Neural networks: An overview of early research current frameworks and new challenges	NEUROCOMPUTING	52	2.85	3	4.072		3	0	0
10.1016/j.patcog.2013.10.003	Design of alignment-free cancelable fingerprint templates via curtailed circular convolution	PATTERN RECOGNITION	52	2.5	1	5.898		0	0	0
10.1007/s10994-016-5546-z	Multi-target regression via input space expansion: treating targets as inputs	MACHINE LEARNING	52	2.25	3	2.809		3	0	0
10.1016/j.media.2014.12.003	Robust whole-brain segmentation: Application to traumatic brain injury	MEDICAL IMAGE ANALYSIS	52	1.75	3	8.88		3	0	0
10.1016/j.patcog.2011.08.014	Fusing appearance and distribution information of interest points for action recognition	PATTERN RECOGNITION	52	1.5	2	5.898		2	0	0
10.1016/j.neunet.2016.10.007	Finite-time synchronization of uncertain coupled switched neural networks under asynchronous switching	NEURAL NETWORKS	52	1	1	5.785		1	0	0
10.1016/j.knosys.2011.10.001	Multi-objective hybrid evolutionary algorithms for radial basis function neural network design	KNOWLEDGE-BASED SYSTEMS	52	1	1	5.101		1	0	0
10.1016/j.eswa.2010.03.045	A new saving-based ant algorithm for the Vehicle Routing Problem with Simultaneous Pickup and Delivery	EXPERT SYSTEMS WITH APPLICATIONS	52	0.75	3	4.292		3	0	0
10.1016/j.inffus.2016.09.006	Boundary finding based multi-focus image fusion through multi-scale morphological focus-measure	INFORMATION FUSION	52	0.5	1	10.716		1	0	0
10.1016/j.artmed.2012.12.001	Mood recognition in bipolar patients through the PSYCHE platform: Preliminary evaluations and perspectives	ARTIFICIAL INTELLIGENCE IN MEDICINE	52	0.5	1	3.574		1	0	0
10.1007/s12559-016-9428-2	Multi-criteria Group Decision-Making Based on Interval Neutrosophic Uncertain Linguistic Variables and Choquet Integral	Cognitive Computation	52	0.5	1	4.287		1	0	0
10.1016/j.dss.2007.12.006	On supply chain cash flow risks	DECISION SUPPORT SYSTEMS	52	0.25	1	3.847		0	0	0
10.1002/widm.24	Data mining tools	WILEY INTERDISCIPLINARY REVIEWS-DATA MINING AND KNOWLEDGE DISCOVERY	51	10.25	12	2.541		12	0	0
10.1016/j.eswa.2009.04.046	Application of fuzzy cognitive maps for cotton yield management in precision farming	EXPERT SYSTEMS WITH APPLICATIONS	51	7.35	21	4.292		21	0	0
10.1016/j.dss.2012.02.002	Building a targeted mobile advertising system for location-based services	DECISION SUPPORT SYSTEMS	51	6	5	3.847		0	4	0
10.1016/j.patcog.2009.05.011	Haar-like features with optimally weighted rectangles for rapid object detection	PATTERN RECOGNITION	51	6	3	5.898		0	3	0
10.1016/j.eswa.2010.11.030	A vision inspection system for the surface defects of strongly reflected metal based on multi-class SVM	EXPERT SYSTEMS WITH APPLICATIONS	51	3	1	4.292		0	1	0
10.1016/j.eswa.2007.05.009	Fuzzy risk analysis based on fuzzy numbers with different shapes and different deviations	EXPERT SYSTEMS WITH APPLICATIONS	51	3	1	4.292		0	1	0
10.1016/j.eswa.2008.04.008	Intelligent extended floating car data collection	EXPERT SYSTEMS WITH APPLICATIONS	51	3	1	4.292		0	1	0
10.1016/j.dss.2008.06.008	Knowledge representation concepts for automated SLA management	DECISION SUPPORT SYSTEMS	51	3	1	3.847		0	1	0
10.1016/j.neunet.2011.10.001	Limited Rank Matrix Learning discriminative dimension reduction and visualization	NEURAL NETWORKS	51	3	1	5.785		0	1	0
10.1016/j.eswa.2011.08.094	Ranking fuzzy cognitive map based scenarios with TOPSIS	EXPERT SYSTEMS WITH APPLICATIONS	51	3	1	4.292		0	0	0
10.1007/s11263-011-0490-7	Sparse Occlusion Detection with Optical Flow	INTERNATIONAL JOURNAL OF COMPUTER VISION	51	3	1	6.071		0	1	0
10.1016/j.eswa.2007.01.043	TextOntoEx: Automatic ontology construction from natural English text	EXPERT SYSTEMS WITH APPLICATIONS	51	3	12	4.292		0	12	0
10.1016/j.eswa.2015.03.017	Stock market trading rule based on pattern recognition and technical analysis: Forecasting the DJIA index with intraday data	EXPERT SYSTEMS WITH APPLICATIONS	51	2.5	3	4.292		3	0	0
10.1016/j.media.2016.06.032	Machine learning approaches in medical image analysis: From detection to diagnosis	MEDICAL IMAGE ANALYSIS	51	1.5	2	8.88		2	0	0
10.1016/j.neunet.2017.02.013	Evaluating deep learning architectures for Speech Emotion Recognition	NEURAL NETWORKS	51	1.25	2	5.785		1	0	0
10.1007/s10462-010-9157-y	Fusion of probabilistic A* algorithm and fuzzy inference system for robotic path planning	ARTIFICIAL INTELLIGENCE REVIEW	51	1.25	2	5.095		0	0	0
10.1016/j.asoc.2016.02.017	A new algorithm for identity verification based on the analysis of a handwritten dynamic signature	APPLIED SOFT COMPUTING	51	1	7	4.873		7	0	0
10.1016/j.patcog.2016.09.029	Comparing two classes of end-to-end machine-learning models in lung nodule detection and classification: MTANNs vs. CNNs	PATTERN RECOGNITION	51	1	1	5.898		0	0	0
10.1016/j.patcog.2009.03.027	Robust supervised classification with mixture models: Learning from data with uncertain labels	PATTERN RECOGNITION	51	1	1	5.898		1	0	0
10.1016/j.eswa.2013.07.078	A fuzzy-based customer clustering approach with hierarchical structure for logistics network optimization	EXPERT SYSTEMS WITH APPLICATIONS	51	0.5	1	4.292		1	0	0
10.1016/j.eswa.2011.03.032	A particle swarm optimization algorithm for open vehicle routing problem	EXPERT SYSTEMS WITH APPLICATIONS	51	0.5	2	4.292		2	0	0
10.1007/s10115-012-0571-0	Geographic knowledge extraction and semantic similarity in OpenStreetMap	KNOWLEDGE AND INFORMATION SYSTEMS	51	0.5	1	2.397		1	0	0
10.1007/s11023-008-9122-6	Is Weak Emergence Just in the Mind?	MINDS AND MACHINES	51	0.5	1	1.4		1	0	0
10.1016/j.asoc.2009.07.003	The SR-GCWS hybrid algorithm for solving the capacitated vehicle routing problem	APPLIED SOFT COMPUTING	51	0.5	1	4.873		1	0	0
10.1016/j.imavis.2008.04.012	Edge landmarks in monocular SLAM	IMAGE AND VISION COMPUTING	50	9	6	2.733		0	6	0
10.1007/s00138-008-0153-z	IBM smart surveillance system (S3): event based video surveillance system with an open and extensible framework	MACHINE VISION AND APPLICATIONS	50	9	11	1.788		0	11	0
10.1177/1059712312465330	What nervous systems do: early evolution input-output and the skin brain thesis	ADAPTIVE BEHAVIOR	50	7.1	14	1.362		11	0	0
10.1007/s10514-009-9158-3	3D mapping with multi-resolution occupied voxel lists	AUTONOMOUS ROBOTS	50	6	3	3.634		0	2	0
10.1016/j.imavis.2009.03.004	Image stitching with dynamic elements	IMAGE AND VISION COMPUTING	50	6	3	2.733		0	3	0
10.1007/s11263-014-0761-1	Structured Overcomplete Sparsifying Transform Learning with Convergence Guarantees and Applications	INTERNATIONAL JOURNAL OF COMPUTER VISION	50	6	2	6.071		0	2	0
10.1007/s10994-011-5259-2	Biography and future challenges	MACHINE LEARNING	50	5.85	5	2.809		4	0	0
10.1016/j.eswa.2012.01.086	Turist@: Agent-based personalised recommendation of tourist activities	EXPERT SYSTEMS WITH APPLICATIONS	50	4	2	4.292		1	1	0
10.1016/j.asoc.2012.02.001	A multi-agent based approach to dynamic scheduling of machines and automated guided vehicles in manufacturing systems	APPLIED SOFT COMPUTING	50	3.5	2	4.873		1	1	0
10.1016/j.media.2015.12.004	PCA-based groupwise image registration for quantitative MRI	MEDICAL IMAGE ANALYSIS	50	3.35	6	8.88		6	0	0
10.1016/j.eswa.2009.03.046	A hybrid recommendation technique based on product category attributes	EXPERT SYSTEMS WITH APPLICATIONS	50	3	1	4.292		0	1	0
10.1016/j.eswa.2007.11.052	A methodological concept for material selection of highly sensitive components based on multiple criteria decision analysis	EXPERT SYSTEMS WITH APPLICATIONS	50	3	4	4.292		0	0	0
10.1016/j.patcog.2008.09.027	A scalable framework for cluster ensembles	PATTERN RECOGNITION	50	3	5	5.898		0	5	0
10.1016/j.datak.2010.07.008	BeAware!-Situation awareness the ontology-driven way	DATA & KNOWLEDGE ENGINEERING	50	3	1	1.583		0	1	0
10.1016/j.neucom.2012.12.063	Clustering in extreme learning machine feature space	NEUROCOMPUTING	50	3	1	4.072		0	0	0
10.1016/j.websem.2009.07.005	From keywords to semantic queries-Incremental query construction on the semantic web	JOURNAL OF WEB SEMANTICS	50	3	1	2.429		0	1	0
10.1016/j.eswa.2012.01.058	Optimization of Radial Basis Function neural network employed for prediction of surface roughness in hard turning process using Taguchi's orthogonal arrays	EXPERT SYSTEMS WITH APPLICATIONS	50	3	1	4.292		0	1	0
10.1016/j.neucom.2008.06.007	Pruning an ensemble of classifiers via reinforcement learning	NEUROCOMPUTING	50	3	1	4.072		0	1	0
10.1016/j.media.2013.04.007	Surgical gesture classification from video and kinematic data	MEDICAL IMAGE ANALYSIS	50	3	1	8.88		0	0	0
10.1007/s00521-015-2089-3	Robust and accurate feature selection for humanoid push recovery and classification: deep learning approach	NEURAL COMPUTING & APPLICATIONS	50	1.85	2	4.664		2	0	0
10.1016/j.swevo.2016.01.005	Metaheuristics in structural optimization and discussions on harmony search algorithm	SWARM AND EVOLUTIONARY COMPUTATION	50	1	1	6.33		1	0	0
10.1016/j.artint.2014.11.008	Methods for solving reasoning problems in abstract argumentation - A survey	ARTIFICIAL INTELLIGENCE	50	1	1	4.483		0	0	0
10.1016/j.media.2015.02.002	Segmentation of pulmonary nodules in computed tomography using a regression neural network approach and its application to the Lung Image Database Consortium and Image Database Resource Initiative dataset	MEDICAL IMAGE ANALYSIS	50	1	1	8.88		1	0	0
10.1016/j.cviu.2014.01.004	A self-adaptive Gaussian mixture model	COMPUTER VISION AND IMAGE UNDERSTANDING	50	0.5	1	2.645		1	0	0
10.1016/j.patrec.2011.09.030	A hierarchical threshold secret image sharing	PATTERN RECOGNITION LETTERS	50	0.25	1	2.81		1	0	0
10.1007/s10618-012-0302-x	Adaptive evolutionary clustering	DATA MINING AND KNOWLEDGE DISCOVERY	50	0.25	2	2.879		2	0	0
10.1016/j.media.2015.05.012	Image reconstruction of compressed sensing MRI using graph-based redundant wavelet transform	MEDICAL IMAGE ANALYSIS	50	0.25	1	8.88		0	0	0
10.1007/s00138-014-0596-3	The ChaLearn gesture dataset (CGD 2011)	MACHINE VISION AND APPLICATIONS	50	0	1	1.788		0	0	0
10.1016/j.dss.2015.09.003	Fame for sale: Efficient detection of fake Twitter followers	DECISION SUPPORT SYSTEMS	49	78.6	119	3.847		111	0	6
10.1016/j.dss.2016.12.001	The technology and economic determinants of cryptocurrency exchange rates: The case of Bitcoin	DECISION SUPPORT SYSTEMS	49	14.5	3	3.847		1	0	1
10.1016/j.neunet.2011.05.011	A kernel-based framework to tensorial data analysis	NEURAL NETWORKS	49	9	1	5.785		0	0	0
10.1016/j.aei.2011.08.007	A distributed multi-model-based Management Information System for simulation and decision-making on construction projects	ADVANCED ENGINEERING INFORMATICS	49	6	2	3.772		0	2	0
10.1016/j.cogsys.2007.06.009	Stigmergic epistemology stigmergic cognition	COGNITIVE SYSTEMS RESEARCH	49	5.5	6	1.384		4	0	0
10.1016/j.neucom.2008.04.005	An efficient gene selection algorithm based on mutual information	NEUROCOMPUTING	49	3	1	4.072		0	1	0
10.1007/s10845-015-1057-1	Build orientation optimization for multi-part production in additive manufacturing	JOURNAL OF INTELLIGENT MANUFACTURING	49	3	1	3.535		0	1	0
10.1016/j.patcog.2013.09.020	HEp-2 image classification using intensity order pooling based features and bag of words	PATTERN RECOGNITION	49	3	2	5.898		0	2	0
10.1016/j.eswa.2006.09.043	Intelligent stock trading system by turning point confirming and probabilistic reasoning	EXPERT SYSTEMS WITH APPLICATIONS	49	3	2	4.292		0	2	0
10.1016/j.eswa.2007.09.061	Modelling situation awareness for Context-aware Decision Support	EXPERT SYSTEMS WITH APPLICATIONS	49	3	1	4.292		0	1	0
10.1007/s10700-008-9037-y	On the use of fuzzy inference techniques in assessment models: part II: industrial applications	FUZZY OPTIMIZATION AND DECISION MAKING	49	3	1	4.128		0	0	0
10.1007/s10618-009-0161-2	Re-examination of interestingness measures in pattern mining: a unified framework	DATA MINING AND KNOWLEDGE DISCOVERY	49	3	1	2.879		0	1	0
10.1016/j.eswa.2010.07.014	Sales forecasting system based on Gray extreme learning machine with Taguchi method in retail industry	EXPERT SYSTEMS WITH APPLICATIONS	49	3	1	4.292		0	1	0
10.1016/j.cogsys.2008.01.002	Using hidden Markov model to uncover processing states from eye movements in information search tasks	COGNITIVE SYSTEMS RESEARCH	49	3	1	1.384		0	1	0
10.1016/j.eswa.2010.12.118	Ontology-based context representation and reasoning for object tracking and scene interpretation in video	EXPERT SYSTEMS WITH APPLICATIONS	49	2	2	4.292		1	0	0
10.1016/j.eswa.2015.07.056	A prospect theory-based interval dynamic reference point method for emergency decision making	EXPERT SYSTEMS WITH APPLICATIONS	49	1.35	2	4.292		2	0	0
10.1016/j.media.2016.04.004	Automatic coronary artery calcium scoring in cardiac CT angiography using paired convolutional neural networks	MEDICAL IMAGE ANALYSIS	49	1	1	8.88		1	0	0
10.1016/j.ijar.2011.10.002	The reduction and fusion of fuzzy covering systems based on the evidence theory	INTERNATIONAL JOURNAL OF APPROXIMATE REASONING	49	1	1	1.982		0	0	0
10.1016/j.asoc.2011.05.021	Localized genetic algorithm for vehicle routing problem with time windows	APPLIED SOFT COMPUTING	49	0.75	12	4.873		12	0	0
10.1016/j.dss.2010.11.008	A web spatial decision support system for vehicle routing using Google Maps	DECISION SUPPORT SYSTEMS	49	0.5	2	3.847		2	0	0
10.1016/j.dss.2013.10.009	Improving business process decision making based on past experience	DECISION SUPPORT SYSTEMS	49	0.5	1	3.847		1	0	0
10.1016/j.knosys.2014.05.008	PoliTwi: Early detection of emerging political topics on twitter and the impact on concept-level sentiment analysis	KNOWLEDGE-BASED SYSTEMS	49	0.5	2	5.101		2	0	0
10.1007/s11263-007-0117-1	Practical global optimization for multiview geometry	INTERNATIONAL JOURNAL OF COMPUTER VISION	49	0.5	1	6.071		1	0	0
10.1016/j.media.2017.01.008	Deep ensemble learning of sparse regression models for brain disease diagnosis	MEDICAL IMAGE ANALYSIS	48	10.35	3	8.88		2	0	1
10.1016/j.artmed.2010.02.001	Intelligent visualization and exploration of time-oriented data of multiple patients	ARTIFICIAL INTELLIGENCE IN MEDICINE	48	9	3	3.574		0	2	0
10.1007/s00138-010-0307-7	Lane detection and tracking using a new lane model and distance transform	MACHINE VISION AND APPLICATIONS	48	6	3	1.788		0	3	0
10.1007/s10462-012-9338-y	Mixture of experts: a literature survey	ARTIFICIAL INTELLIGENCE REVIEW	48	6	2	5.095		0	1	0
10.1145/2559952	On Unexpectedness in Recommender Systems: Or How to Better Expect the Unexpected	ACM TRANSACTIONS ON INTELLIGENT SYSTEMS AND TECHNOLOGY	48	6	2	2.861		0	1	0
10.1016/j.media.2008.05.001	Probabilistic white matter fiber tracking using particle filtering and von Mises-Fisher sampling	MEDICAL IMAGE ANALYSIS	48	6	2	8.88		0	2	0
10.1016/j.cviu.2010.01.011	Using Human Visual System modeling for bio-inspired low level image processing	COMPUTER VISION AND IMAGE UNDERSTANDING	48	4	3	2.645		2	1	0
10.1007/s11263-009-0252-y	Foreground Focus: Unsupervised Learning from Partially Matching Images	INTERNATIONAL JOURNAL OF COMPUTER VISION	48	3.5	2	6.071		1	1	0
10.1016/j.eswa.2010.01.011	Chaotic-based hybrid negative selection algorithm and its applications in fault and anomaly detection	EXPERT SYSTEMS WITH APPLICATIONS	48	3	4	4.292		0	4	0
10.1007/s10514-009-9151-x	Elastic roadmaps-motion generation for autonomous mobile manipulation	AUTONOMOUS ROBOTS	48	3	1	3.634		0	0	0
10.1016/j.neucom.2007.12.038	Fast and adaptive network of spiking neurons for multi-view visual pattern recognition	NEUROCOMPUTING	48	3	23	4.072		0	23	0
10.1016/j.imavis.2008.03.004	Hand gesture recognition and tracking based on distributed locally linear embedding	IMAGE AND VISION COMPUTING	48	3	1	2.733		0	1	0
10.1016/j.patrec.2008.01.032	Local stereo matching with adaptive support-weight rank transform and disparity calibration	PATTERN RECOGNITION LETTERS	48	3	4	2.81		0	4	0
10.1007/s11263-008-0135-7	Optimization algorithms on subspaces: Revisiting missing data problem in low-rank matrix	INTERNATIONAL JOURNAL OF COMPUTER VISION	48	3	8	6.071		0	8	0
10.1016/j.eswa.2012.02.189	Parkinson's Disease tremor classification - A comparison between Support Vector Machines and neural networks	EXPERT SYSTEMS WITH APPLICATIONS	48	3	1	4.292		0	1	0
10.1016/j.imavis.2007.06.005	Total variation minimizing blind deconvolution with shock filter reference	IMAGE AND VISION COMPUTING	48	3	1	2.733		0	1	0
10.1016/j.eswa.2012.03.046	Web usage mining to improve the design of an e-commerce website: OrOliveSur.com	EXPERT SYSTEMS WITH APPLICATIONS	48	2.7	4	4.292		4	0	0
10.1016/j.cviu.2016.09.001	Computer vision for assistive technologies	COMPUTER VISION AND IMAGE UNDERSTANDING	48	2	2	2.645		2	0	0
10.1016/j.neucom.2017.05.025	Medical image retrieval using deep convolutional neural network	NEUROCOMPUTING	48	1.75	7	4.072		7	0	0
10.1016/j.ijar.2008.03.001	New geometric inference techniques for type-2 fuzzy sets	INTERNATIONAL JOURNAL OF APPROXIMATE REASONING	48	1.5	2	1.982		2	0	0
10.1007/s10489-011-0309-9	A graph coloring constructive hyper-heuristic for examination timetabling problems	APPLIED INTELLIGENCE	48	1.1	11	2.882		11	0	0
10.1007/s12559-016-9394-8	A Neutrosophic Normal Cloud and Its Application in Decision-Making	COGNITIVE COMPUTATION	48	1	3	4.287		3	0	0
10.1016/j.dss.2012.12.027	Enhancing financial performance with social media: An impression management perspective	DECISION SUPPORT SYSTEMS	48	1	2	3.847		2	0	0
10.1007/s12652-016-0374-3	Exploring the ambient assisted living domain: a systematic review	JOURNAL OF AMBIENT INTELLIGENCE AND HUMANIZED COMPUTING	48	1	1	1.91		1	0	0
10.1016/j.datak.2011.09.004	OCL-Lite: Finite reasoning on UML/OCL conceptual schemas	DATA & KNOWLEDGE ENGINEERING	48	1	1	1.583		1	0	0
10.1016/j.dss.2012.11.015	Partial Least Square Discriminant Analysis for bankruptcy prediction	DECISION SUPPORT SYSTEMS	48	1	2	3.847		2	0	0
10.1016/j.neunet.2016.10.006	Synchronization of discrete-time neural networks with delays and Markov jump topologies based on tracker information	NEURAL NETWORKS	48	1	1	5.785		1	0	0
10.1007/s10514-016-9548-2	Low-drift and real-time lidar odometry and mapping	AUTONOMOUS ROBOTS	48	0.75	2	3.634		1	0	0
10.1007/s10732-011-9181-3	On dominance-based multiobjective local search: design implementation and experimental analysis on scheduling and traveling salesman problems	JOURNAL OF HEURISTICS	48	0.75	5	1.392		4	0	0
10.1007/s11047-009-9111-6	A memetic algorithm for the generalized traveling salesman problem	NATURAL COMPUTING	48	0.5	3	1.33		3	0	0
10.1016/j.knosys.2015.02.005	Computer-aided diagnosis of diabetic subjects by heart rate variability signals using discrete wavelet transform method	KNOWLEDGE-BASED SYSTEMS	48	0.5	1	5.101		1	0	0
10.1016/j.dss.2013.01.023	Deriving market intelligence from microblogs	DECISION SUPPORT SYSTEMS	48	0.5	1	3.847		1	0	0
10.1016/j.eswa.2011.10.012	Solving the traveling salesman problem using cooperative genetic ant systems	EXPERT SYSTEMS WITH APPLICATIONS	48	0.5	4	4.292		4	0	0
10.1016/j.neucom.2007.02.014	PS trained ANN-based differential protection scheme for power transformers	NEUROCOMPUTING	48	0.25	1	4.072		0	0	0
10.1016/j.patcog.2012.01.003	Robust classification using l(2 1)-norm based regression model	PATTERN RECOGNITION	48	0.25	1	5.898		0	0	0
10.1016/j.neucom.2011.09.002	Spectral clustering: A semi-supervised approach	NEUROCOMPUTING	48	0.25	1	4.072		1	0	0
10.1049/iet-bmt.2012.0071	Motion-based counter-measures to photo attacks in face recognition	IET BIOMETRICS	47	4	3	2.092		2	1	0
10.1007/s10851-013-0490-z	Overview of the Geometries of Shape Spaces and Diffeomorphism Groups	JOURNAL OF MATHEMATICAL IMAGING AND VISION	47	4	4	1.603		3	0	0
10.1016/j.neucom.2007.08.025	A behavior controller based on spiking neural networks for mobile robots	NEUROCOMPUTING	47	3	1	4.072		0	1	0
10.1016/j.neucom.2011.06.010	A combined SMOTE and PSO based RBF classifier for two-class imbalanced problems	NEUROCOMPUTING	47	3	5	4.072		0	5	0
10.1007/s10618-009-0148-z	A fast outlier detection strategy for distributed high-dimensional data sets with mixed attributes	DATA MINING AND KNOWLEDGE DISCOVERY	47	3	1	2.879		0	1	0
10.1016/j.eswa.2011.03.081	A novel clustering method on time series data	EXPERT SYSTEMS WITH APPLICATIONS	47	3	1	4.292		0	1	0
10.1016/j.media.2008.10.007	A quality-guided displacement tracking algorithm for ultrasonic elasticity imaging	MEDICAL IMAGE ANALYSIS	47	3	3	8.88		0	3	0
10.1016/j.media.2010.08.001	A wavelet-based regularized reconstruction algorithm for SENSE parallel MRI with applications to neuroimaging	MEDICAL IMAGE ANALYSIS	47	3	1	8.88		0	1	0
10.1007/s10846-009-9359-1	An Efficient Path Planning and Control Algorithm for RUAV's in Unknown and Cluttered Environments	JOURNAL OF INTELLIGENT & ROBOTIC SYSTEMS	47	3	1	2.02		0	1	0
10.1016/j.eswa.2011.01.046	An efficient phishing webpage detector	EXPERT SYSTEMS WITH APPLICATIONS	47	3	2	4.292		0	2	0
10.1016/j.patcog.2008.01.026	Chromaticity-based separation of reflection components in a single image	PATTERN RECOGNITION	47	3	2	5.898		0	2	0
10.1016/j.asoc.2014.02.006	Exchange market algorithm	APPLIED SOFT COMPUTING	47	3	1	4.873		0	0	0
10.1007/s10851-010-0242-2	Generalized Gaussian Scale-Space Axiomatics Comprising Linear Scale-Space Affine Scale-Space and Spatio-Temporal Scale-Space	JOURNAL OF MATHEMATICAL IMAGING AND VISION	47	3	2	1.603		0	2	0
10.1016/j.media.2011.11.001	Mass preserving image registration for lung CT	MEDICAL IMAGE ANALYSIS	47	3	1	8.88		0	1	0
10.1007/s10994-011-5235-x	Reinforcement learning in feedback control Challenges and benchmarks from technical process control	MACHINE LEARNING	47	3	4	2.809		0	4	0
10.1016/j.patcog.2011.08.004	Robust line matching through line-point invariants	PATTERN RECOGNITION	47	3	1	5.898		0	1	0
10.1016/j.eswa.2010.08.040	Virtual metrology for run-to-run control in semiconductor manufacturing	EXPERT SYSTEMS WITH APPLICATIONS	47	3	5	4.292		0	5	0
10.1016/j.patrec.2012.03.022	Visible and infrared image registration in man-made environments employing hybrid visual features	PATTERN RECOGNITION LETTERS	47	3	1	2.81		0	1	0
10.1016/j.asoc.2011.09.021	A discrete particle swarm optimization algorithm with self-adaptive diversity control for the permutation flowshop problem with blocking	APPLIED SOFT COMPUTING	47	2	3	4.873		3	0	0
10.1016/j.eswa.2016.12.036	The impact of microblogging data for stock market prediction: Using Twitter to predict returns volatility trading volume and survey sentiment indices	EXPERT SYSTEMS WITH APPLICATIONS	47	2	3	4.292		3	0	0
10.1016/j.patcog.2014.11.016	Fuzzy human motion analysis: A review	PATTERN RECOGNITION	47	1.5	3	5.898		3	0	0
10.1007/s00521-015-1840-0	A novel hybrid feature selection method based on rough set and improved harmony search	NEURAL COMPUTING & APPLICATIONS	47	1	1	4.664		1	0	0
10.1016/j.neucom.2014.08.091	Addressing imbalance in multilabel classification: Measures and random resampling algorithms	NEUROCOMPUTING	47	1	1	4.072		1	0	0
10.1016/j.patcog.2011.08.024	Semi-supervised classification based on random subspace dimensionality reduction	PATTERN RECOGNITION	47	0.25	1	5.898		0	0	0
10.1016/j.neucom.2017.02.029	Group sparse regularization for deep neural networks	NEUROCOMPUTING	46	19.9	19	4.072		16	0	0
10.1016/j.datak.2009.08.006	Sorting improves word-aligned bitmap indexes	DATA & KNOWLEDGE ENGINEERING	46	17.338	22	1.583		9	6	0
10.1016/j.neunet.2011.03.001	Are computational models of any use to psychiatry?	NEURAL NETWORKS	46	9	1	5.785		0	0	0
10.1016/j.neunet.2014.03.007	Detecting cells using non-negative matrix factorization on calcium imaging data	NEURAL NETWORKS	46	7	10	5.785		1	9	0
10.1016/j.media.2011.02.004	Evaluation framework for carotid bifurcation lumen segmentation and stenosis grading	MEDICAL IMAGE ANALYSIS	46	6	3	8.88		0	3	0
10.1016/j.cviu.2017.04.002	Hough-CNN: Deep learning for segmentation of deep brain regions in MRI and ultrasound	COMPUTER VISION AND IMAGE UNDERSTANDING	46	6	2	2.645		0	2	0
10.1007/s10844-013-0248-5	Feature learning and deep architectures: new directions for music informatics	JOURNAL OF INTELLIGENT INFORMATION SYSTEMS	46	5	13	1.589		13	0	0
10.1016/j.eswa.2013.12.050	A multi-objective hyper-heuristic based on choice function	EXPERT SYSTEMS WITH APPLICATIONS	46	4.35	146	4.292		145	0	0
10.1016/j.csl.2015.03.003	A survey on sound source localization in robotics: From binaural to array processing methods	COMPUTER SPEECH AND LANGUAGE	46	4	3	1.857		1	2	0
10.1016/j.patcog.2011.08.008	BioSecure signature evaluation campaign (BSEC'2009): Evaluating online signature algorithms depending on the quality of signatures	PATTERN RECOGNITION	46	4	2	5.898		1	0	0
10.1007/s11047-013-9398-1	A review of morphogenetic engineering	NATURAL COMPUTING	46	3.85	6	1.33		5	0	0
10.1016/j.patcog.2008.05.006	Waveprint: Efficient wavelet-based audio fingerprinting	PATTERN RECOGNITION	46	3.5	10	5.898		1	9	0
10.1016/j.eswa.2008.11.049	A two-stage modeling with genetic algorithms for the nurse scheduling problem	EXPERT SYSTEMS WITH APPLICATIONS	46	3	4	4.292		0	4	0
10.1016/j.eswa.2009.05.053	A virtual metrology system for semiconductor manufacturing	EXPERT SYSTEMS WITH APPLICATIONS	46	3	2	4.292		0	2	0
10.1016/j.media.2015.12.002	Automated classification of brain tumor type in whole-slide digital pathology images using local representative tiles	MEDICAL IMAGE ANALYSIS	46	3	1	8.88		0	1	0
10.1016/j.media.2014.04.003	Body-wide hierarchical fuzzy modeling recognition and delineation of anatomy in medical images	MEDICAL IMAGE ANALYSIS	46	3	1	8.88		0	1	0
10.1016/j.dss.2008.08.004	Determinants of online merchant rating: Content analysis of consumer comments about Yahoo merchants	DECISION SUPPORT SYSTEMS	46	3	2	3.847		0	2	0
10.1016/j.patrec.2008.03.009	Discriminative cue integration for medical image annotation	PATTERN RECOGNITION LETTERS	46	3	1	2.81		0	1	0
10.1049/iet-ipr.2010.0084	Efficient fusion for infrared and visible images based on compressive sensing principle	IET IMAGE PROCESSING	46	3	1	2.004		0	1	0
10.1016/j.inffus.2007.03.001	Ensemble methods for anomaly detection and distributed intrusion detection in Mobile Ad-Hoc Networks	INFORMATION FUSION	46	3	1	10.716		0	1	0
10.1016/j.neucom.2011.12.027	Is your phone so smart to affect your state? An exploratory study based on psychophysiological measures	NEUROCOMPUTING	46	3	1	4.072		0	0	0
10.1016/j.imavis.2009.08.001	Micro-crack inspection in heterogeneously textured solar wafers using anisotropic diffusion	IMAGE AND VISION COMPUTING	46	3	2	2.733		0	2	0
10.1007/s11263-010-0352-8	Monocular Template-based Reconstruction of Inextensible Surfaces	INTERNATIONAL JOURNAL OF COMPUTER VISION	46	3	2	6.071		0	2	0
10.1016/j.dss.2011.05.007	Knowledge sharing and investment decisions in information security	DECISION SUPPORT SYSTEMS	46	1.5	2	3.847		2	0	0
10.1016/j.datak.2009.04.002	Improving the performance of focused web crawlers	DATA & KNOWLEDGE ENGINEERING	46	1	1	1.583		1	0	0
10.1177/1059712307087283	Mutual mate choice can drive costly signaling even under perfect monogamy	ADAPTIVE BEHAVIOR	46	1	2	1.362		2	0	0
10.1007/s10618-012-0291-9	On constrained spectral clustering and its applications	DATA MINING AND KNOWLEDGE DISCOVERY	46	1	1	2.879		0	0	0
10.1016/j.dss.2012.03.003	To whom should I listen? Finding reputable reviewers in opinion-sharing communities	DECISION SUPPORT SYSTEMS	46	1	1	3.847		1	0	0
10.1016/j.asoc.2017.06.059	A novel hybridization strategy for krill herd algorithm applied to clustering techniques	APPLIED SOFT COMPUTING	46	0.5	1	4.873		1	0	0
10.1016/j.knosys.2016.10.003	A survey of the applications of text mining in financial domain	KNOWLEDGE-BASED SYSTEMS	46	0.5	1	5.101		1	0	0
10.1016/j.neucom.2016.01.102	Clustering by fast search and find of density peaks via heat diffusion	NEUROCOMPUTING	46	0.5	1	4.072		1	0	0
10.1007/s10618-013-0341-y	Link prediction in heterogeneous data via generalized coupled tensor factorization	DATA MINING AND KNOWLEDGE DISCOVERY	46	0.5	1	2.879		1	0	0
10.1016/j.knosys.2011.07.007	Mining the real-time web: A novel approach to product recommendation	KNOWLEDGE-BASED SYSTEMS	46	0.5	1	5.101		1	0	0
10.1016/j.eswa.2009.05.093	Automatic stock decision support system based on box theory and SVM algorithm	EXPERT SYSTEMS WITH APPLICATIONS	46	0.25	1	4.292		1	0	0
10.1016/j.eswa.2006.10.012	Market segmentation based on hierarchical self-organizing map for markets of multimedia on demand	EXPERT SYSTEMS WITH APPLICATIONS	46	0.25	1	4.292		0	0	0
10.1016/j.artint.2009.07.006	Uncertainty modelling for vague concepts: A prototype theory approach	ARTIFICIAL INTELLIGENCE	46	0.25	1	4.483		1	0	0
10.3389/fnbot.2017.00035	Hybrid Brain-Computer interface Techniques for improved Classification Accuracy and increased Number of Commands: A Review	FRONTIERS IN NEUROROBOTICS	45	7.7	19	3		18	0	0
10.1016/j.dss.2010.03.001	Web user behavioral profiling for user identification	DECISION SUPPORT SYSTEMS	45	7	3	3.847		1	2	0
10.1007/s10994-009-5124-8	Learning to classify with missing and corrupted features	MACHINE LEARNING	45	6	2	2.809		0	1	0
10.1007/s10994-012-5316-5	Quantum speed-up for unsupervised learning	MACHINE LEARNING	45	6	5	2.809		4	0	0
10.1145/1516533.1516536	Semantics-based Context-aware Dynamic Service Composition	ACM TRANSACTIONS ON AUTONOMOUS AND ADAPTIVE SYSTEMS	45	6	3	2.66		0	3	0
10.1016/j.eswa.2010.05.070	Trip destination prediction based on past GPS log using a Hidden Markov Model	EXPERT SYSTEMS WITH APPLICATIONS	45	6	3	4.292		0	2	0
10.1016/j.knosys.2012.07.008	pi-football: A Bayesian network model for forecasting Association Football match outcomes	KNOWLEDGE-BASED SYSTEMS	45	5.5	3	5.101		0	0	0
10.1016/j.cviu.2010.07.012	View-invariant gesture recognition using 3D optical flow and harmonic motion context	COMPUTER VISION AND IMAGE UNDERSTANDING	45	5.5	2	2.645		0	1	0
10.1016/j.artint.2008.05.003	A linear approximation method for the Shapley value	ARTIFICIAL INTELLIGENCE	45	5.088	1	4.483		0	0	0
10.1007/s00521-013-1364-4	An experimental characterization of reservoir computing in ambient assisted living applications	NEURAL COMPUTING & APPLICATIONS	45	3	1	4.664		0	0	0
10.1016/j.asoc.2012.03.064	Fuzzy cognitive map ensemble learning paradigm to solve classification problems: Application to autism identification	APPLIED SOFT COMPUTING	45	3	2	4.873		0	2	0
10.1007/s11263-013-0666-4	Multi-Target Tracking by Online Learning a CRF Model of Appearance and Motion Patterns	INTERNATIONAL JOURNAL OF COMPUTER VISION	45	3	1	6.071		0	1	0
10.1007/s10845-008-0128-y	Paradigm shift: unified and associative feature-based concurrent and collaborative engineering	JOURNAL OF INTELLIGENT MANUFACTURING	45	3	2	3.535		0	0	0
10.1016/j.patrec.2009.09.004	Resolution enhancement based on learning the sparse association of image patches	PATTERN RECOGNITION LETTERS	45	3	1	2.81		0	1	0
10.1016/j.media.2010.05.006	Respiratory motion compensation by model-based catheter tracking during EP procedures	MEDICAL IMAGE ANALYSIS	45	3	5	8.88		0	5	0
10.1016/j.datak.2009.04.001	Semantics preserving SPARQL-to-SQL translation	DATA & KNOWLEDGE ENGINEERING	45	3	1	1.583		0	1	0
10.1016/j.media.2015.07.003	Multi-scale deep networks and regression forests for direct bi-ventricular volume estimation	MEDICAL IMAGE ANALYSIS	45	2.25	3	8.88		1	0	0
10.1007/s11263-013-0655-7	Detecting People Looking at Each Other in Videos	INTERNATIONAL JOURNAL OF COMPUTER VISION	45	1.75	3	6.071		2	0	0
10.1016/j.knosys.2016.04.005	An adaptive multi-population artificial bee colony algorithm for dynamic optimisation problems	KNOWLEDGE-BASED SYSTEMS	45	1.1	20	5.101		20	0	0
10.1007/s00521-013-1437-4	Adaptive k-means clustering algorithm for MR breast image segmentation	NEURAL COMPUTING & APPLICATIONS	45	1	1	4.664		1	0	0
10.1007/s10514-015-9491-7	Multi-robot target detection and tracking: taxonomy and survey	AUTONOMOUS ROBOTS	45	0.75	2	3.634		1	0	0
10.1016/j.artmed.2015.05.002	An approach to fuzzy soft sets in decision making based on grey relational analysis and Dempster-Shafer theory of evidence: An application in medical diagnosis	ARTIFICIAL INTELLIGENCE IN MEDICINE	45	0.5	1	3.574		1	0	0
10.1016/j.dss.2013.06.012	How to preserve the conflict as an alarm in the combination of belief functions?	DECISION SUPPORT SYSTEMS	45	0.5	1	3.847		1	0	0
10.1016/j.dss.2013.05.005	Impact of informational factors on online recommendation credibility: The moderating role of source credibility	DECISION SUPPORT SYSTEMS	45	0.5	1	3.847		1	0	0
10.1016/j.bica.2012.05.002	On a roadmap for the BICA Challenge	BIOLOGICALLY INSPIRED COGNITIVE ARCHITECTURES	45	0.5	1	1.597		1	0	0
10.1137/100785855	Total Variation as a Local Filter	SIAM JOURNAL ON IMAGING SCIENCES	45	0.5	1	2.514		1	0	0
10.1016/j.patcog.2013.08.009	KHATT: An open Arabic offline handwritten text database	PATTERN RECOGNITION	45	0.25	2	5.898		0	0	0
10.1016/j.artint.2010.09.006	Measuring universal intelligence: Towards an anytime intelligence test	ARTIFICIAL INTELLIGENCE	44	10.596	3	4.483		1	0	0
10.1016/j.knosys.2013.06.011	Determining the best set of seismicity indicators to predict earthquakes. Two case studies: Chile and the Iberian Peninsula	KNOWLEDGE-BASED SYSTEMS	44	9.5	2	5.101		1	0	1
10.1016/j.asoc.2011.05.011	Credit risk evaluation using neural networks: Emotional versus conventional models	APPLIED SOFT COMPUTING	44	9	1	4.873		0	0	0
10.1007/s00138-009-0231-x	In-vehicle camera traffic sign detection and recognition	MACHINE VISION AND APPLICATIONS	44	9	3	1.788		0	3	0
10.1016/j.neucom.2015.11.021	Crowd behavior analysis: A review where physics meets biology	NEUROCOMPUTING	44	7.7	14	4.072		12	0	0
10.1016/j.media.2014.11.012	Independent measurement of femoral cortical thickness and cortical bone density using clinical CT	MEDICAL IMAGE ANALYSIS	44	7	3	8.88		1	2	0
10.1016/j.eswa.2008.08.076	A vision-based analysis system for gait recognition in patients with Parkinson's disease	EXPERT SYSTEMS WITH APPLICATIONS	44	6	2	4.292		0	2	0
10.1016/j.bica.2013.02.003	Application of multi-dimensional scaling and artificial neural networks for biologically inspired opinion mining	BIOLOGICALLY INSPIRED COGNITIVE ARCHITECTURES	44	4.35	3	1.597		2	0	0
10.1007/s10618-015-0448-4	Characterizing concept drift	DATA MINING AND KNOWLEDGE DISCOVERY	44	4.35	16	2.879		16	0	0
10.1016/j.media.2008.05.005	A non-parametric vessel detection method for complex vascular structures	MEDICAL IMAGE ANALYSIS	44	3	1	8.88		0	1	0
10.1016/j.knosys.2013.02.012	An interval-valued intuitionistic fuzzy LINMAP method with inclusion comparison possibilities and hybrid averaging operations for multiple criteria group decision making	KNOWLEDGE-BASED SYSTEMS	44	3	4	5.101		0	0	0
10.1016/j.neucom.2011.12.055	Feature selection for nonlinear models with extreme learning machines	NEUROCOMPUTING	44	3	1	4.072		0	1	0
10.1016/j.patcog.2013.03.010	Local descriptors in application to the aging problem in face recognition	PATTERN RECOGNITION	44	3	1	5.898		0	1	0
10.1016/j.cviu.2009.09.002	Non-Gaussian model-based fusion of noisy images in the wavelet domain	COMPUTER VISION AND IMAGE UNDERSTANDING	44	3	1	2.645		0	1	0
10.1007/s10851-008-0090-5	Partial partitions partial connections and connective segmentation	JOURNAL OF MATHEMATICAL IMAGING AND VISION	44	3	1	1.603		0	0	0
10.1016/j.patcog.2010.08.021	Skeleton growing and pruning with bending potential ratio	PATTERN RECOGNITION	44	3	1	5.898		0	0	0
10.1016/j.websem.2013.03.001	SMARTMUSEUM: A mobile recommender system for the Web of Data	JOURNAL OF WEB SEMANTICS	44	3	1	2.429		0	0	0
10.1016/j.aei.2015.03.006	Status quo and open challenges in vision-based sensing and tracking of temporary resources on infrastructure construction sites	ADVANCED ENGINEERING INFORMATICS	44	3	1	3.772		0	1	0
10.1016/j.dss.2012.12.023	What's buzzing in the blizzard of buzz? Automotive component isolation in social media postings	DECISION SUPPORT SYSTEMS	44	3	1	3.847		0	1	0
10.1016/j.eswa.2012.02.153	Computer Aided Diagnosis tool for Alzheimer's Disease based on Mann-Whitney-Wilcoxon U-Test	EXPERT SYSTEMS WITH APPLICATIONS	44	2.7	3	4.292		3	0	0
10.1137/120886935	An MBO Scheme on Graphs for Classification and Image Processing	SIAM JOURNAL ON IMAGING SCIENCES	44	2	5	2.514		0	0	0
10.1016/j.imavis.2007.06.010	Face recognition with disguise and single gallery images	IMAGE AND VISION COMPUTING	44	1.85	2	2.733		2	0	0
10.1016/j.neunet.2013.11.009	Feature selection and multi-kernel learning for sparse representation on a manifold	NEURAL NETWORKS	44	1.35	2	5.785		2	0	0
10.1016/j.inffus.2013.10.011	Image fusion using intuitionistic fuzzy sets	INFORMATION FUSION	44	1.25	2	10.716		1	0	0
10.1007/s10462-013-9406-y	Metalearning: a survey of trends and technologies	ARTIFICIAL INTELLIGENCE REVIEW	44	1.25	2	5.095		2	0	0
10.1016/j.asoc.2015.07.023	A binary ABC algorithm based on advanced similarity scheme for feature selection	APPLIED SOFT COMPUTING	44	1	1	4.873		1	0	0
10.1016/j.asoc.2015.08.027	A semi-supervised system for weed mapping in sunflower crops using unmanned aerial vehicles and a crop row detection method	APPLIED SOFT COMPUTING	44	1	1	4.873		1	0	0
10.1016/j.knosys.2016.08.014	A survey of serendipity in recommender systems	KNOWLEDGE-BASED SYSTEMS	44	1	1	5.101		1	0	0
10.1007/s00521-012-1196-7	Decision tree classifiers for automated medical diagnosis	NEURAL COMPUTING & APPLICATIONS	44	1	1	4.664		1	0	0
10.1016/j.cviu.2011.09.008	Modeling and prediction of driver behavior by foot gesture analysis	COMPUTER VISION AND IMAGE UNDERSTANDING	44	1	1	2.645		1	0	0
10.1016/j.patcog.2010.10.013	Quantitative analysis of human facial beauty using geometric features	PATTERN RECOGNITION	44	1	3	5.898		2	0	0
10.1016/j.knosys.2015.05.027	ROSEFW-RF: The winner algorithm for the ECBDL'14 big data competition: An extremely imbalanced big data bioinformatics problem	KNOWLEDGE-BASED SYSTEMS	44	1	1	5.101		1	0	0
10.1016/j.artmed.2017.02.005	A novel hierarchical selective ensemble classifier with bioinformatics application	ARTIFICIAL INTELLIGENCE IN MEDICINE	44	0.5	1	3.574		1	0	0
10.1007/s12559-012-9179-7	A Twin Multi-Class Classification Support Vector Machine	COGNITIVE COMPUTATION	44	0.5	1	4.287		1	0	0
10.1016/j.aei.2013.12.002	Automatic design and planning of scaffolding systems using building information modeling	ADVANCED ENGINEERING INFORMATICS	44	0.25	1	3.772		0	0	0
10.1016/j.dss.2011.05.004	Interactive or interruptive? Instant messaging at work	DECISION SUPPORT SYSTEMS	44	0.25	1	3.847		0	0	0
10.1080/09540090903197928	Modelling social interaction as perceptual crossing: an investigation into the dynamics of the interaction process	CONNECTION SCIENCE	44	0.25	2	0.673		2	0	0
10.1016/j.neucom.2014.02.018	Two algorithms for orthogonal nonnegative matrix factorization with application to clustering	NEUROCOMPUTING	44	0.25	1	4.072		1	0	0
10.1016/j.neunet.2012.09.016	Artificial vision by multi-layered neural networks: Neocognitron and its advances	NEURAL NETWORKS	43	28.85	31	5.785		4	0	0
10.1016/j.knosys.2011.06.018	Semantic Web search based on rough sets and Fuzzy Formal Concept Analysis	KNOWLEDGE-BASED SYSTEMS	43	9	3	5.101		0	3	0
10.1016/j.aei.2013.06.001	BIMQL - An open query language for building information models	ADVANCED ENGINEERING INFORMATICS	43	6.25	8	3.772		8	0	0
10.1007/s10115-011-0447-8	Facing the reality of data stream classification: coping with scarcity of labeled data	KNOWLEDGE AND INFORMATION SYSTEMS	43	6	2	2.397		0	2	0
10.1016/j.aei.2011.12.001	General system architecture for BIM: An integrated approach for design and analysis	ADVANCED ENGINEERING INFORMATICS	43	3.5	2	3.772		1	0	0
10.1016/j.ijar.2008.01.005	A hybrid approach to semantic web services matchmaking	INTERNATIONAL JOURNAL OF APPROXIMATE REASONING	43	3	2	1.982		0	2	0
10.1016/j.knosys.2007.04.002	A new framework for detecting weighted sequential patterns in large sequence databases	KNOWLEDGE-BASED SYSTEMS	43	3	1	5.101		0	1	0
10.1016/j.eswa.2008.10.010	A novel clustering algorithm based on the extension theory and genetic algorithm	EXPERT SYSTEMS WITH APPLICATIONS	43	3	1	4.292		0	0	0
10.1016/j.media.2010.12.006	A spatiotemporal statistical atlas of motion for the quantification of abnormal myocardial tissue velocities	MEDICAL IMAGE ANALYSIS	43	3	1	8.88		0	1	0
10.1016/j.patcog.2010.01.009	Accurate video text detection through classification of low and high contrast images	PATTERN RECOGNITION	43	3	2	5.898		0	2	0
10.1016/j.eswa.2007.08.105	An expert system design for a crude oil distillation column with the neural networks model and the process optimization using genetic algorithm framework	EXPERT SYSTEMS WITH APPLICATIONS	43	3	1	4.292		0	1	0
10.1016/j.neunet.2008.05.004	Cerebellar development transcriptome database (CDT-DB): Profiling of spatio-temporal gene expression during the postnatal development of mouse cerebellum	NEURAL NETWORKS	43	3	1	5.785		0	0	0
10.1007/s11263-008-0166-0	Learning to Combine Bottom-Up and Top-Down Segmentation	INTERNATIONAL JOURNAL OF COMPUTER VISION	43	3	1	6.071		0	1	0
10.1145/2414425.2414430	Lexical Normalization for Social Media Text	ACM TRANSACTIONS ON INTELLIGENT SYSTEMS AND TECHNOLOGY	43	3	1	2.861		0	1	0
10.1162/artl_a_00080	Locomotion Without a Brain: Physical Reservoir Computing in Tensegrity Structures	ARTIFICIAL LIFE	43	2.1	4	1.608		4	0	0
10.1016/j.media.2015.02.001	Large-scale automatic reconstruction of neuronal processes from electron microscopy images	MEDICAL IMAGE ANALYSIS	43	1.5	2	8.88		2	0	0
10.1007/s11047-010-9180-6	Petri nets for modelling metabolic pathways: a survey	NATURAL COMPUTING	43	1.35	2	1.33		2	0	0
10.1007/s10514-013-9374-8	A variable compliance soft gripper	AUTONOMOUS ROBOTS	43	1.25	3	3.634		2	0	0
10.1007/s10994-012-5311-x	Non-homogeneous dynamic Bayesian networks with Bayesian regularization for inferring gene regulatory networks with gradually time-varying structure	MACHINE LEARNING	43	1.25	2	2.809		2	0	0
10.1016/j.eswa.2011.10.004	Common sets of weights as summaries of DEA profiles of weights: With an application to the ranking of professional tennis players	EXPERT SYSTEMS WITH APPLICATIONS	43	1	2	4.292		2	0	0
10.1111/j.1467-8640.2012.00456.x	EMOTIONS IN TEXT: DIMENSIONAL AND CATEGORICAL MODELS	COMPUTATIONAL INTELLIGENCE	43	1	2	0.776		2	0	0
10.1007/s11721-011-0062-z	Majority-rule opinion dynamics with differential latency: a mechanism for self-organized collective decision-making	SWARM INTELLIGENCE	43	1	1	2.208		1	0	0
10.1177/1059712309103430	Self-Organized Aggregation Triggers Collective Decision Making in a Group of Cockroach-Like Robots	ADAPTIVE BEHAVIOR	43	1	1	1.362		1	0	0
10.1007/s10732-007-9045-z	A reactive variable neighborhood tabu search for the heterogeneous fleet vehicle routing problem with time windows	JOURNAL OF HEURISTICS	43	0.5	2	1.392		2	0	0
10.1016/j.eswa.2013.10.062	Close-loop or open hierarchical structures in green supply chain management under uncertainty	EXPERT SYSTEMS WITH APPLICATIONS	43	0.5	1	4.292		1	0	0
10.1049/iet-ipr.2012.0114	Enhancement of dark and low-contrast images using dynamic stochastic resonance	IET IMAGE PROCESSING	43	0.5	1	2.004		1	0	0
10.1016/j.knosys.2014.11.010	Median evidential c-means algorithm and its application to community detection	KNOWLEDGE-BASED SYSTEMS	43	0.5	2	5.101		2	0	0
10.1016/j.inffus.2012.01.008	Simultaneous image fusion and super-resolution using sparse representation	INFORMATION FUSION	43	0.5	1	10.716		1	0	0
10.1016/j.aei.2011.11.003	Disassembly sequence structure graphs: An optimal approach for multiple-target selective disassembly sequence planning	ADVANCED ENGINEERING INFORMATICS	43	0.25	1	3.772		1	0	0
10.1016/j.websem.2016.03.003	Triple Pattern Fragments: A low-cost knowledge graph interface for the Web	JOURNAL OF WEB SEMANTICS	42	14	21	2.429		20	0	0
10.1007/s11023-008-9131-5	Expertise and Intuition: A Tale of Three Theories	MINDS AND MACHINES	42	11	3	1.4		2	0	1
10.1007/s10514-009-9135-x	An adaptive vision-based autopilot for mini flying machines guidance navigation and control	AUTONOMOUS ROBOTS	42	9	11	3.634		0	11	0
10.1016/j.cviu.2008.07.002	Measuring uncertainty in graph cut solutions	COMPUTER VISION AND IMAGE UNDERSTANDING	42	6	3	2.645		0	3	0
10.1007/s10115-013-0652-8	On the difficulty of automatically detecting irony: beyond a simple case of negation	KNOWLEDGE AND INFORMATION SYSTEMS	42	3.45	6	2.397		5	0	0
10.1016/j.patrec.2008.02.001	An efficient iterative algorithm for image thresholding	PATTERN RECOGNITION LETTERS	42	3	1	2.81		0	1	0
10.1016/j.patrec.2008.11.013	Class dependent feature scaling method using naive Bayes classifier for text datamining	PATTERN RECOGNITION LETTERS	42	3	1	2.81		0	0	0
10.1016/j.patrec.2007.11.002	Constructing cylindrical coordinate colour spaces	PATTERN RECOGNITION LETTERS	42	3	1	2.81		0	0	0
10.1016/j.patcog.2008.05.024	Face recognition using adaptively weighted patch PZM array from a single exemplar image per person	PATTERN RECOGNITION	42	3	1	5.898		0	1	0
10.1007/s10994-011-5263-6	Learning by extrapolation from marginal to full-multivariate probability distributions: decreasingly naive Bayesian classification	MACHINE LEARNING	42	3	1	2.809		0	0	0
10.1016/j.patcog.2009.11.019	Multimodal interactive transcription of text images	PATTERN RECOGNITION	42	3	1	5.898		0	1	0
10.1007/s11263-012-0542-7	Multi-view Scene Flow Estimation: A View Centered Variational Approach	INTERNATIONAL JOURNAL OF COMPUTER VISION	42	3	1	6.071		0	1	0
10.1007/s10851-008-0102-5	On straight line segment detection	JOURNAL OF MATHEMATICAL IMAGING AND VISION	42	3	2	1.603		0	2	0
10.1016/j.artint.2013.06.002	POMDP-based control of workflows for crowdsourcing	ARTIFICIAL INTELLIGENCE	42	3	1	4.483		0	1	0
10.1007/s10489-010-0216-5	Semi-Markov conditional random fields for accelerometer-based activity recognition	APPLIED INTELLIGENCE	42	3	1	2.882		0	1	0
10.1016/j.neunet.2008.10.002	Stereo saliency map considering affective factors and selective motion analysis in a dynamic environment	NEURAL NETWORKS	42	3	2	5.785		0	2	0
10.1016/j.artmed.2017.03.001	Improved prediction of protein-protein interactions using novel negative samples features and an ensemble classifier	ARTIFICIAL INTELLIGENCE IN MEDICINE	42	2.35	6	3.574		6	0	0
10.1016/j.eswa.2016.05.017	A computational approach for detecting pigmented skin lesions in macroscopic images	EXPERT SYSTEMS WITH APPLICATIONS	42	1.85	3	4.292		3	0	0
10.1016/j.neucom.2011.08.029	Decisional DNA: A multi-technology shareable knowledge structure for decisional experience	NEUROCOMPUTING	42	1.5	2	4.072		2	0	0
10.1007/s10817-012-9250-9	The HOL Light Theory of Euclidean Space	JOURNAL OF AUTOMATED REASONING	42	1.35	2	1.172		2	0	0
10.1016/j.eswa.2015.06.024	A highly accurate firefly based algorithm for heart disease prediction	EXPERT SYSTEMS WITH APPLICATIONS	42	1	1	4.292		0	0	0
10.1016/j.neunet.2016.04.011	A note on finite-time and fixed-time stability	NEURAL NETWORKS	42	1	2	5.785		2	0	0
10.1080/09548980802192784	A temporal difference account of avoidance learning	NETWORK-COMPUTATION IN NEURAL SYSTEMS	42	1	1	1		1	0	0
10.1016/j.asoc.2011.11.029	Application of Particle Swarm Optimization to uniform and variable strength covering array construction	APPLIED SOFT COMPUTING	42	1	1	4.873		1	0	0
10.1016/j.eswa.2014.12.044	Linguistic features for review helpfulness prediction	EXPERT SYSTEMS WITH APPLICATIONS	42	1	2	4.292		2	0	0
10.1016/j.patcog.2011.06.011	Representing and recognizing objects with massive local image patches	PATTERN RECOGNITION	42	1	1	5.898		1	0	0
10.1016/j.dss.2012.12.006	A new linear & nonlinear artificial neural network model for time series forecasting	DECISION SUPPORT SYSTEMS	42	0.5	1	3.847		1	0	0
10.1016/j.datak.2017.01.001	Big data technologies and Management: What conceptual modeling can do	DATA & KNOWLEDGE ENGINEERING	42	0.5	1	1.583		1	0	0
10.1016/j.dss.2012.08.003	Combining social network and semantic concept analysis for personalized academic researcher recommendation	DECISION SUPPORT SYSTEMS	42	0.5	1	3.847		1	0	0
10.1016/j.eswa.2012.12.014	Mitigation of greenhouse gas emissions in vehicle routing problems with backhauling	EXPERT SYSTEMS WITH APPLICATIONS	42	0.5	1	4.292		1	0	0
10.1016/j.eswa.2016.03.031	Unsupervised method for sentiment analysis in online texts	EXPERT SYSTEMS WITH APPLICATIONS	42	0.5	1	4.292		1	0	0
10.1016/j.eswa.2014.04.011	Wi-Fi multi-floor indoor positioning considering architectural aspects and controlled computational complexity	EXPERT SYSTEMS WITH APPLICATIONS	42	0.5	1	4.292		1	0	0
10.1016/j.neucom.2013.09.075	Elastic extreme learning machine for big data classification	NEUROCOMPUTING	42	0.25	1	4.072		0	0	0
10.1007/s00521-014-1756-0	Improved cuckoo search algorithm using dimensional entropy gain (Retraction of 2015)	NEURAL COMPUTING & APPLICATIONS	42	0.25	1	4.664		1	0	0
10.1016/j.dss.2010.08.013	Manipulation in digital word-of-mouth: A reality check for book reviews	DECISION SUPPORT SYSTEMS	42	0.25	1	3.847		0	0	0
10.1007/s10845-012-0627-8	Particle swarm optimization algorithm for a vehicle routing problem with heterogeneous fleet mixed backhauls and time windows	JOURNAL OF INTELLIGENT MANUFACTURING	42	0.25	1	3.535		0	0	0
10.1016/j.eswa.2008.09.001	Solving a vehicle routing problem with time windows by a decomposition technique and a genetic algorithm	EXPERT SYSTEMS WITH APPLICATIONS	42	0.25	1	4.292		1	0	0
10.1016/j.asoc.2009.01.002	Video-based signer-independent Arabic sign language recognition using hidden Markov models	APPLIED SOFT COMPUTING	42	0.25	1	4.873		0	0	0
10.1016/j.imavis.2007.11.007	Real-time hand posture recognition using range data	IMAGE AND VISION COMPUTING	41	9	31	2.733		0	31	0
10.1016/j.csl.2008.04.003	A machine learning approach to reading level assessment	COMPUTER SPEECH AND LANGUAGE	41	6	3	1.857		0	3	0
10.1016/j.media.2008.01.002	An efficient locally affine framework for the smooth registration of anatomical structures	MEDICAL IMAGE ANALYSIS	41	6	2	8.88		0	2	0
10.1016/j.patcog.2017.05.012	Learning features for offline handwritten signature verification using deep convolutional neural networks	PATTERN RECOGNITION	41	5.75	19	5.898		17	0	0
10.1016/j.eswa.2014.05.013	Electroencephalogram subject identification: A review	EXPERT SYSTEMS WITH APPLICATIONS	41	5.68	1	4.292		0	0	0
10.1016/j.media.2015.10.005	High-throughput histopathological image analysis via robust cell segmentation and hashing	MEDICAL IMAGE ANALYSIS	41	4.85	5	8.88		3	2	0
10.1137/130918885	The Varifold Representation of Nonoriented Shapes for Diffeomorphic Registration	SIAM JOURNAL ON IMAGING SCIENCES	41	3.5	4	2.514		1	0	0
10.1016/j.eswa.2008.10.015	A new two-stage hybrid approach of credit risk in banking industry	EXPERT SYSTEMS WITH APPLICATIONS	41	3	1	4.292		0	0	0
10.1007/s11023-009-9158-2	Empathy with Inanimate Objects and the Uncanny Valley	MINDS AND MACHINES	41	3	1	1.4		0	0	0
10.1007/s11263-011-0501-8	Estimating the Natural Illumination Conditions from a Single Outdoor Image	INTERNATIONAL JOURNAL OF COMPUTER VISION	41	3	2	6.071		0	2	0
10.1049/iet-ipr.2007.0193	Fast video shot boundary detection framework employing pre-processing techniques	IET IMAGE PROCESSING	41	3	1	2.004		0	1	0
10.1016/j.patcog.2011.08.009	Hybrid active learning for reducing the annotation effort of operators in classification systems	PATTERN RECOGNITION	41	3	1	5.898		0	0	0
10.1016/j.neucom.2007.10.025	Local face sketch synthesis learning	NEUROCOMPUTING	41	3	1	4.072		0	1	0
10.1007/s10514-010-9207-y	Observability-based consistent EKF estimators for multi-robot cooperative localization	AUTONOMOUS ROBOTS	41	3	1	3.634		0	1	0
10.1007/s11263-009-0291-4	What Do the Sun and the Sky Tell Us About the Camera?	INTERNATIONAL JOURNAL OF COMPUTER VISION	41	3	1	6.071		0	1	0
10.1016/j.eswa.2013.12.009	Automated trading with performance weighted random forests and seasonality	EXPERT SYSTEMS WITH APPLICATIONS	41	2.1	3	4.292		2	0	0
10.1016/j.knosys.2016.05.035	Figurative messages and affect in Twitter: Differences between #irony #sarcasm and #not	KNOWLEDGE-BASED SYSTEMS	41	2	4	5.101		4	0	0
10.1016/j.eswa.2013.06.076	Semantic orientation for polarity classification in Spanish reviews	EXPERT SYSTEMS WITH APPLICATIONS	41	2	2	4.292		2	0	0
10.1080/18756891.2015.1017377	A MapReduce Approach to Address Big Data Classification Problems Based on the Fusion of Linguistic Fuzzy Rules	INTERNATIONAL JOURNAL OF COMPUTATIONAL INTELLIGENCE SYSTEMS	41	1.75	4	2.153		4	0	0
10.1016/j.eswa.2014.11.011	Feature decision-making ant colony optimization system for an automated recognition of plant species	EXPERT SYSTEMS WITH APPLICATIONS	41	1.5	2	4.292		2	0	0
10.1137/120866014	A Unifying Parametric Framework for 2D Steerable Wavelet Transforms	SIAM JOURNAL ON IMAGING SCIENCES	41	1.35	2	2.514		2	0	0
10.1016/j.patcog.2015.09.001	A hierarchical local region-based sparse shape composition for liver segmentation in CT scans	PATTERN RECOGNITION	41	1	1	5.898		1	0	0
10.1016/j.eswa.2016.08.046	A hybrid differential evolution for optimal multilevel image thresholding	EXPERT SYSTEMS WITH APPLICATIONS	41	1	1	4.292		1	0	0
10.1007/s10489-009-0187-6	Agent-based execution of personalised home care treatments	APPLIED INTELLIGENCE	41	1	1	2.882		1	0	0
10.1016/j.patrec.2009.09.032	An evaluation of direct attacks using fake fingers generated from ISO templates	PATTERN RECOGNITION LETTERS	41	1	1	2.81		1	0	0
10.1016/j.media.2014.12.001	Automated localization of breast cancer in DCE-MRI	MEDICAL IMAGE ANALYSIS	41	1	1	8.88		1	0	0
10.1016/j.ijar.2008.02.006	Estimation of causal effects using linear non-Gaussian causal models with hidden variables	INTERNATIONAL JOURNAL OF APPROXIMATE REASONING	41	1	1	1.982		1	0	0
10.1016/j.cviu.2014.02.013	Image classification by non-negative sparse coding correlation constrained low-rank and sparse decomposition	COMPUTER VISION AND IMAGE UNDERSTANDING	41	1	1	2.645		1	0	0
10.1007/s11263-009-0274-5	Physics-Based Person Tracking Using the Anthropomorphic Walker	INTERNATIONAL JOURNAL OF COMPUTER VISION	41	1	1	6.071		0	0	0
10.1016/j.eswa.2015.11.002	Writer identification using texture descriptors of handwritten fragments	EXPERT SYSTEMS WITH APPLICATIONS	41	1	2	4.292		2	0	0
10.1016/j.aei.2016.11.007	A review of essential standards and patent landscapes for the Internet of Things: A key enabler for Industry 4.0	ADVANCED ENGINEERING INFORMATICS	41	0.5	1	3.772		1	0	0
10.1016/j.asoc.2017.02.007	Ensemble particle swarm optimizer	APPLIED SOFT COMPUTING	41	0.5	1	4.873		1	0	0
10.1016/j.eswa.2015.04.058	Gold price volatility: A forecasting approach using the Artificial Neural Network-GARCH model	EXPERT SYSTEMS WITH APPLICATIONS	41	0.5	1	4.292		1	0	0
10.1016/j.swevo.2011.06.006	Sentence selection for generic document summarization using an adaptive differential evolution algorithm	SWARM AND EVOLUTIONARY COMPUTATION	41	0.5	1	6.33		1	0	0
10.1016/j.eswa.2011.07.068	Exploring the affect factors of knowledge sharing behavior: The relations model theory perspective	EXPERT SYSTEMS WITH APPLICATIONS	41	0.25	1	4.292		1	0	0
10.1007/s00500-015-1600-1	Knowledge representation using interval-valued fuzzy formal concept lattice	SOFT COMPUTING	41	0.25	1	2.784		0	0	0
10.1016/j.eswa.2014.08.011	Memetic search for the quadratic assignment problem	EXPERT SYSTEMS WITH APPLICATIONS	41	0.25	1	4.292		0	0	0
10.1016/j.patrec.2012.06.009	Spatio-temporal reasoning for the classification of satellite image time series	PATTERN RECOGNITION LETTERS	41	0.25	1	2.81		0	0	0
10.1016/j.media.2016.09.003	Vision-based and marker-less surgical tool detection and tracking: a review of the literature	MEDICAL IMAGE ANALYSIS	41	0.25	1	8.88		1	0	0
10.1016/j.csl.2013.08.003	The listening talker: A review of human and algorithmic context-induced modifications of speech	COMPUTER SPEECH AND LANGUAGE	40	11.6	6	1.857		4	0	1
10.1016/j.cviu.2008.08.005	A mapping and localization framework for scalable appearance-based navigation	COMPUTER VISION AND IMAGE UNDERSTANDING	40	9	6	2.645		0	6	0
10.1016/j.dss.2010.11.005	An empirical investigation of the impacts of internal/external facilitators on the project success of ERP: A structural equation model	DECISION SUPPORT SYSTEMS	40	6.064	1	3.847		0	0	0
10.1016/j.media.2012.06.003	A multiple-instance learning framework for diabetic retinopathy screening	MEDICAL IMAGE ANALYSIS	40	6	6	8.88		0	6	0
10.1016/j.eswa.2006.08.014	Bowel-sound pattern analysis using wavelets and neural networks with application to long-term unsupervised gastrointestinal motility monitoring	EXPERT SYSTEMS WITH APPLICATIONS	40	6	3	4.292		0	3	0
10.1016/j.artmed.2014.11.003	DrugNet: Network-based drug-disease prioritization by integrating heterogeneous data	ARTIFICIAL INTELLIGENCE IN MEDICINE	40	4.7	8	3.574		7	0	0
10.1007/s00138-012-0431-7	Toward a computer vision-based wayfinding aid for blind persons to access unfamiliar indoor environments	MACHINE VISION AND APPLICATIONS	40	4.05	6	1.788		6	0	0
10.1016/j.patcog.2013.10.006	Efficient monte carlo methods for multi-dimensional learning with classifier chains	PATTERN RECOGNITION	40	4	7	5.898		4	0	0
10.1016/j.csl.2010.06.001	A three-stage approach to the automated scoring of spontaneous spoken responses	COMPUTER SPEECH AND LANGUAGE	40	3.5	4	1.857		1	3	0
10.1016/j.dss.2012.12.030	Stochastic ordinal regression for multiple criteria sorting problems	DECISION SUPPORT SYSTEMS	40	3.5	5	3.847		1	0	0
10.1016/j.eswa.2012.03.026	A knowledge-based system approach for sensor fault modeling detection and mitigation	EXPERT SYSTEMS WITH APPLICATIONS	40	3	2	4.292		0	2	0
10.1016/j.knosys.2012.03.014	A new automatic identification system of insect images at the order level	KNOWLEDGE-BASED SYSTEMS	40	3	1	5.101		0	1	0
10.1137/110820579	Adaptive Compressed Image Sensing Using Dictionaries	SIAM JOURNAL ON IMAGING SCIENCES	40	3	1	2.514		0	1	0
10.1016/j.artmed.2007.09.002	An automated cervical pre-cancerous diagnostic system	ARTIFICIAL INTELLIGENCE IN MEDICINE	40	3	1	3.574		0	1	0
10.1016/j.aei.2013.03.005	An automated vision-based method for rapid 3D energy performance modeling of existing buildings using thermal and digital imagery	ADVANCED ENGINEERING INFORMATICS	40	3	1	3.772		0	1	0
10.1007/s10514-009-9144-9	Contact sensing and grasping performance of compliant hands	AUTONOMOUS ROBOTS	40	3	1	3.634		0	1	0
10.1016/j.imavis.2013.10.007	Direct model based visual tracking and pose estimation using mutual information	IMAGE AND VISION COMPUTING	40	3	1	2.733		0	1	0
10.1016/j.eswa.2010.09.012	Machine learning approach for automated visual inspection of machine components	EXPERT SYSTEMS WITH APPLICATIONS	40	3	1	4.292		0	1	0
10.1016/j.patrec.2011.11.006	Multispectral scleral patterns for ocular biometric recognition	PATTERN RECOGNITION LETTERS	40	3	4	2.81		0	4	0
10.1016/j.neucom.2014.12.015	No-reference image quality assessment with shearlet transform and deep neural networks	NEUROCOMPUTING	40	3	1	4.072		0	1	0
10.1007/s10851-014-0506-3	Sliced and Radon Wasserstein Barycenters of Measures	JOURNAL OF MATHEMATICAL IMAGING AND VISION	40	3	1	1.603		0	0	0
10.1016/j.patrec.2011.06.027	Stereo matching using gradient similarity and locally adaptive support-weight	PATTERN RECOGNITION LETTERS	40	3	2	2.81		0	2	0
10.1016/j.knosys.2014.01.020	Two methods of selecting Gaussian kernel parameters for one-class SVM and their application to fault detection	KNOWLEDGE-BASED SYSTEMS	40	3	3	5.101		0	3	0
10.1016/j.datak.2009.06.004	User-private information retrieval based on a peer-to-peer community	DATA & KNOWLEDGE ENGINEERING	40	3	1	1.583		0	1	0
10.1002/widm.52	Advances in data stream mining	WILEY INTERDISCIPLINARY REVIEWS-DATA MINING AND KNOWLEDGE DISCOVERY	40	2.25	4	2.541		4	0	0
10.1016/j.eswa.2013.05.050	Emotion detection in suicide notes	EXPERT SYSTEMS WITH APPLICATIONS	40	1.5	2	4.292		2	0	0
10.1016/j.eswa.2012.01.024	A variable neighborhood search for the multi-depot vehicle routing problem with loading cost	EXPERT SYSTEMS WITH APPLICATIONS	40	1.35	2	4.292		2	0	0
10.1002/widm.1114	Mining data with random forests: current options for real-world applications	WILEY INTERDISCIPLINARY REVIEWS-DATA MINING AND KNOWLEDGE DISCOVERY	40	1	1	2.541		1	0	0
10.1016/j.datak.2011.11.004	SBV-Cut: Vertex-cut based graph partitioning using structural balance vertices	DATA & KNOWLEDGE ENGINEERING	40	1	1	1.583		1	0	0
10.1016/j.neucom.2008.06.008	Simulation and tracking control based on neural-network strategy and sliding-mode control for underwater remotely operated vehicle	NEUROCOMPUTING	40	1	1	4.072		0	0	0
10.1016/j.asoc.2013.08.015	A multi-objective dynamic vehicle routing problem with fuzzy time windows: Model solution and application	APPLIED SOFT COMPUTING	40	0.5	2	4.873		2	0	0
10.1016/j.dss.2013.02.007	A new temporal and social PMF-based method to predict users' interests in micro-blogging	DECISION SUPPORT SYSTEMS	40	0.5	1	3.847		1	0	0
10.1016/j.artint.2013.11.002	The actor's view of automated planning and acting: A position paper	ARTIFICIAL INTELLIGENCE	40	0.5	1	4.483		1	0	0
10.1016/j.asoc.2015.04.037	Towards the fast and robust optimal design of wireless body area networks	APPLIED SOFT COMPUTING	40	0.5	2	4.873		2	0	0
10.1016/j.patrec.2011.04.017	Towards the unification of structural and statistical pattern recognition	PATTERN RECOGNITION LETTERS	40	0.5	2	2.81		0	0	0
10.1016/j.patcog.2010.03.014	Adaptive thresholding algorithm: Efficient computation technique based on intelligent block detection for degraded document images	PATTERN RECOGNITION	40	0.25	1	5.898		0	0	0
10.1002/widm.1048	An overview of social network analysis	WILEY INTERDISCIPLINARY REVIEWS-DATA MINING AND KNOWLEDGE DISCOVERY	40	0.25	1	2.541		1	0	0
10.1007/s10514-012-9275-2	Decentralized path planning for multi-agent teams with complex constraints	AUTONOMOUS ROBOTS	40	0.25	1	3.634		0	0	0
10.1016/j.neucom.2014.08.042	Spherical symmetric 3D local ternary patterns for natural texture and biomedical image indexing and retrieval	NEUROCOMPUTING	40	0.25	1	4.072		0	0	0
10.1016/j.neunet.2013.01.019	Realtime cerebellum: A large-scale spiking network model of the cerebellum that runs in realtime using a graphics processing unit	NEURAL NETWORKS	39	79.3	54	5.785		49	0	4
10.1016/j.neunet.2013.03.011	The rise of machine consciousness: Studying consciousness with computational models	NEURAL NETWORKS	39	23.85	36	5.785		32	0	0
10.1007/s11047-011-9255-z	Approximating Mexican highways with slime mould	NATURAL COMPUTING	39	9.81	6	1.33		5	0	0
10.1007/s10851-010-0220-8	Direct Sparse Deblurring	JOURNAL OF MATHEMATICAL IMAGING AND VISION	39	6	4	1.603		0	4	0
10.1007/s10115-014-0789-0	Evaluating link prediction methods	KNOWLEDGE AND INFORMATION SYSTEMS	39	5.25	12	2.397		12	0	0
10.1007/s00521-013-1498-4	A framework for self-tuning optimization algorithm	NEURAL COMPUTING & APPLICATIONS	39	4.75	5	4.664		4	0	0
10.1007/s11263-012-0566-z	A Linear Optimal Transportation Framework for Quantifying and Visualizing Variations in Sets of Images	INTERNATIONAL JOURNAL OF COMPUTER VISION	39	3.5	2	6.071		1	1	0
10.1007/s12559-012-9145-4	Sentic Album: Content- Concept- and Context-Based Online Personal Photo Management System	COGNITIVE COMPUTATION	39	3.5	2	4.287		1	1	0
10.1016/j.asoc.2009.09.006	Probability Collectives: A multi-agent approach for solving combinatorial optimization problems	APPLIED SOFT COMPUTING	39	3.25	3	4.873		0	2	0
10.1016/j.media.2008.02.003	A geometric flow for segmenting vasculature in proton-density weighted MRI	MEDICAL IMAGE ANALYSIS	39	3	1	8.88		0	1	0
10.1016/j.cviu.2010.01.004	Cascade of descriptors to detect and track objects across any network of cameras	COMPUTER VISION AND IMAGE UNDERSTANDING	39	3	2	2.645		0	2	0
10.1016/j.eswa.2009.09.036	Choice of the wavelet analyzing in the phonocardiogram signal analysis using the discrete and the packet wavelet transform	EXPERT SYSTEMS WITH APPLICATIONS	39	3	1	4.292		0	0	0
10.1007/s10845-008-0135-z	Configuration for mass customization: how to extend product configuration towards requirements and process configuration	JOURNAL OF INTELLIGENT MANUFACTURING	39	3	1	3.535		0	1	0
10.1007/s10846-012-9716-3	Cooperative Large Area Surveillance with a Team of Aerial Mobile Robots for Long Endurance Missions	JOURNAL OF INTELLIGENT & ROBOTIC SYSTEMS	39	3	1	2.02		0	1	0
10.1016/j.cviu.2008.11.005	Detection and segmentation of moving objects in complex scenes	COMPUTER VISION AND IMAGE UNDERSTANDING	39	3	1	2.645		0	1	0
10.1016/j.eswa.2011.06.046	Diagnosing diabetes using neural networks on small mobile devices	EXPERT SYSTEMS WITH APPLICATIONS	39	3	1	4.292		0	1	0
10.1016/j.imavis.2010.01.003	Efficient multiple phase shift patterns for dense 3D acquisition in structured light scanning	IMAGE AND VISION COMPUTING	39	3	1	2.733		0	1	0
10.1016/j.imavis.2011.03.004	Evolutionary-computer-assisted design of image operators that detect interest points using genetic programming	IMAGE AND VISION COMPUTING	39	3	1	2.733		0	0	0
10.1016/j.patrec.2007.12.009	Hierarchical initialization approach for K-Means clustering	PATTERN RECOGNITION LETTERS	39	3	1	2.81		0	1	0
10.1016/j.media.2007.06.006	Hierarchical statistical shape analysis and prediction of sub-cortical brain structures	MEDICAL IMAGE ANALYSIS	39	3	1	8.88		0	1	0
10.1016/j.aei.2013.01.001	Model falsification diagnosis and sensor placement for leak detection in pressurized pipe networks	ADVANCED ENGINEERING INFORMATICS	39	3	1	3.772		0	1	0
10.1007/s00138-013-0555-4	pROST: a smoothed l(p)-norm robust online subspace tracking method for background subtraction in video	MACHINE VISION AND APPLICATIONS	39	3	3	1.788		0	3	0
10.1007/s11263-013-0681-5	Spectral Log-Demons: Diffeomorphic Image Registration with Very Large Deformations	INTERNATIONAL JOURNAL OF COMPUTER VISION	39	3	1	6.071		0	0	0
10.1007/s10514-007-9064-5	User-adapted plan recognition and user-adapted shared control: A Bayesian approach to semi-autonomous wheelchair driving	AUTONOMOUS ROBOTS	39	3	3	3.634		0	3	0
10.1016/j.dss.2011.02.003	Using RFID for the management of pharmaceutical inventory - system optimization and shrinkage control	DECISION SUPPORT SYSTEMS	39	3	11	3.847		0	11	0
10.1016/j.websem.2007.11.010	Using the Semantic Web for linking and reusing data across Web 2.0 communities	JOURNAL OF WEB SEMANTICS	39	3	2	2.429		0	2	0
10.1145/2700466	Who Will Retweet This? Detecting Strangers from Twitter to Retweet Information	ACM TRANSACTIONS ON INTELLIGENT SYSTEMS AND TECHNOLOGY	39	3	2	2.861		0	2	0
10.1137/120875843	Symmetrizing Smoothing Filters	SIAM JOURNAL ON IMAGING SCIENCES	39	2.6	4	2.514		4	0	0
10.1016/j.eswa.2011.09.066	Mining customer knowledge for exploring online group buying behavior	EXPERT SYSTEMS WITH APPLICATIONS	39	2	2	4.292		2	0	0
10.3389/fnbot.2015.00003	Self-organizing neural integration of pose-motion features for human action recognition	FRONTIERS IN NEUROROBOTICS	39	1.75	3	3		3	0	0
10.1049/iet-bmt.2013.0081	Mobile signature verification: feature robustness and performance comparison	IET BIOMETRICS	39	1.35	2	2.092		2	0	0
10.1016/j.dss.2016.02.012	Decision support approaches for cyber security investment	DECISION SUPPORT SYSTEMS	39	1.25	2	3.847		2	0	0
10.1002/widm.1178	Community detection in social networks	WILEY INTERDISCIPLINARY REVIEWS-DATA MINING AND KNOWLEDGE DISCOVERY	39	1	3	2.541		2	0	0
10.1007/s10462-012-9319-1	Features extraction for soccer video semantic analysis: current achievements and remaining issues	ARTIFICIAL INTELLIGENCE REVIEW	39	1	2	5.095		2	0	0
10.1016/j.dss.2009.06.011	An exploratory study of cognitive effort involved in decision under Framing-an application of the eye-tracking technology	DECISION SUPPORT SYSTEMS	39	0.75	2	3.847		2	0	0
10.1049/iet-bmt.2012.0003	Oriented diffusion filtering for enhancing low-quality fingerprint images	IET BIOMETRICS	39	0.75	2	2.092		1	0	0
10.1016/j.asoc.2017.03.017	Multi-population parallel self-adaptive differential artificial bee colony algorithm with application in large-scale service composition for cloud manufacturing	APPLIED SOFT COMPUTING	39	0.5	1	4.873		1	0	0
10.1016/j.eswa.2008.10.031	A fuzzy guided multi-objective evolutionary algorithm model for solving transportation problem	EXPERT SYSTEMS WITH APPLICATIONS	39	0.25	2	4.292		2	0	0
10.1016/j.knosys.2014.06.006	A fuzzy inhomogenous multiattribute group decision making approach to solve outsourcing provider selection problems	KNOWLEDGE-BASED SYSTEMS	39	0.25	1	5.101		1	0	0
10.1016/j.eswa.2009.02.093	Design and development of a mobile peer-to-peer social networking application	EXPERT SYSTEMS WITH APPLICATIONS	39	0.25	1	4.292		0	0	0
10.1016/j.datak.2012.12.001	Extraction of fuzzy rules from fuzzy decision trees: An axiomatic fuzzy sets (AFS) approach	DATA & KNOWLEDGE ENGINEERING	39	0.25	1	1.583		0	0	0
10.1016/j.eswa.2011.08.171	Optimizing replenishment polices using Genetic Algorithm for single-warehouse multi-retailer system	EXPERT SYSTEMS WITH APPLICATIONS	39	0.25	15	4.292		15	0	0
10.1007/s11263-014-0759-8	Utilizing Local Phase Information to Remove Rain from Video	INTERNATIONAL JOURNAL OF COMPUTER VISION	38	52.08	7	6.071		0	0	6
10.1016/j.imavis.2013.12.002	Comparison of human and computer performance across face recognition experiments	IMAGE AND VISION COMPUTING	38	22	3	2.733		0	0	3
10.1007/s00138-011-0337-9	Automatic segmentation of adherent biological cell boundaries and nuclei from brightfield microscopy images	MACHINE VISION AND APPLICATIONS	38	9	3	1.788		0	3	0
10.1016/j.patcog.2008.10.011	Feature selection based on loss-margin of nearest neighbor classification	PATTERN RECOGNITION	38	7	4	5.898		1	3	0
10.1016/j.patcog.2013.02.008	A comparison of 3D interest point descriptors with application to airport baggage object detection in complex CT imagery	PATTERN RECOGNITION	38	6	3	5.898		0	1	0
10.1016/j.patrec.2012.01.009	Combining perspiration- and morphology-based static features for fingerprint liveness detection	PATTERN RECOGNITION LETTERS	38	6	2	2.81		0	2	0
10.1016/j.asoc.2013.11.018	Multi-level image thresholding by synergetic differential evolution	APPLIED SOFT COMPUTING	38	6	2	4.873		0	2	0
10.1016/j.artmed.2016.01.002	From complex questionnaire and interviewing data to intelligent Bayesian network models for medical decision support	ARTIFICIAL INTELLIGENCE IN MEDICINE	38	3.5	2	3.574		1	0	0
10.1007/s10618-015-0421-2	Multiscale event detection in social media	DATA MINING AND KNOWLEDGE DISCOVERY	38	3.5	11	2.879		10	0	0
10.1016/j.neucom.2007.12.016	A granular-oriented development of functional radial basis function neural networks	NEUROCOMPUTING	38	3	1	4.072		0	1	0
10.1016/j.patcog.2013.05.009	A literature survey on robust and efficient eye localization in real-life scenarios	PATTERN RECOGNITION	38	3	1	5.898		0	1	0
10.1016/j.dss.2011.10.014	Building ontology based knowledge maps to assist business process re-engineering	DECISION SUPPORT SYSTEMS	38	3	2	3.847		0	2	0
10.1016/j.eswa.2009.03.067	Contextualized mobile recommendation service based on interactive social network discovered from mobile users	EXPERT SYSTEMS WITH APPLICATIONS	38	3	5	4.292		0	5	0
10.1016/j.patrec.2010.09.008	Enhancement of feature extraction for low-quality fingerprint images using stochastic resonance	PATTERN RECOGNITION LETTERS	38	3	1	2.81		0	1	0
10.1016/j.eswa.2007.12.046	Image watermarking scheme using nonnegative matrix factorization and wavelet transform	EXPERT SYSTEMS WITH APPLICATIONS	38	3	1	4.292		0	1	0
10.1016/j.cviu.2009.03.002	Object separation by polarimetric and spectral imagery fusion	COMPUTER VISION AND IMAGE UNDERSTANDING	38	3	9	2.645		0	9	0
10.1016/j.eswa.2011.08.132	Wavelet-based envelope features with automatic EOG artifact removal: Application to single-trial EEG data	EXPERT SYSTEMS WITH APPLICATIONS	38	3	1	4.292		0	1	0
10.1016/j.dss.2016.06.014	The use of profit scoring as an alternative to credit scoring systems in peer-to-peer (P2P) lending	DECISION SUPPORT SYSTEMS	38	2.7	3	3.847		3	0	0
10.1016/j.neunet.2009.01.009	Discrete combinatorial circuits emerging in neural networks: A mechanism for rules of grammar in the human brain?	NEURAL NETWORKS	38	2	2	5.785		2	0	0
10.1016/j.websem.2011.09.001	Challenges for the multilingual Web of Data	JOURNAL OF WEB SEMANTICS	38	1.5	2	2.429		2	0	0
10.1016/j.eswa.2011.07.129	A fuzzy risk assessment model for hospital information system implementation	EXPERT SYSTEMS WITH APPLICATIONS	38	1.25	3	4.292		2	0	0
10.1016/j.asoc.2009.08.011	An informed genetic algorithm for the examination timetabling problem	APPLIED SOFT COMPUTING	38	1.25	3	4.873		3	0	0
10.1016/j.dss.2011.02.013	Decision support for Cybersecurity risk planning	DECISION SUPPORT SYSTEMS	38	1	1	3.847		1	0	0
10.1016/j.swevo.2015.07.002	Electromagnetic field optimization: A physics-inspired metaheuristic optimization algorithm	SWARM AND EVOLUTIONARY COMPUTATION	38	1	1	6.33		1	0	0
10.1016/j.neunet.2016.12.002	Fast learning method for convolutional neural networks using extreme learning machine and its application to lane detection	NEURAL NETWORKS	38	1	1	5.785		1	0	0
10.1016/j.eswa.2014.05.009	Forest Optimization Algorithm	EXPERT SYSTEMS WITH APPLICATIONS	38	1	1	4.292		1	0	0
10.1016/j.neunet.2016.12.005	Global exponential stability and dissipativity of generalized neural networks with time-varying delay signals	NEURAL NETWORKS	38	1	1	5.785		1	0	0
10.1016/j.knosys.2013.07.003	MENTOR: A graphical monitoring tool of preferences evolution in large-scale group decision making	KNOWLEDGE-BASED SYSTEMS	38	1	1	5.101		1	0	0
10.1002/sam.11192	Mining Compressing Sequential Patterns	STATISTICAL ANALYSIS AND DATA MINING	38	1	2	0.741		2	0	0
10.1016/j.artmed.2008.03.010	Rating organ failure via adverse events using data mining in the intensive care unit	ARTIFICIAL INTELLIGENCE IN MEDICINE	38	1	1	3.574		0	0	0
10.1016/j.asoc.2016.05.034	Tournament-based harmony search algorithm for non-convex economic load dispatch problem	APPLIED SOFT COMPUTING	38	1	1	4.873		0	0	0
10.1016/j.eswa.2008.01.072	A hybrid genetic algorithm that optimizes capacitated vehicle routing problems	EXPERT SYSTEMS WITH APPLICATIONS	38	0.75	3	4.292		3	0	0
10.1016/j.asoc.2015.07.008	Application of evolutionary computation for rule discovery in stock algorithmic trading: A literature review	APPLIED SOFT COMPUTING	38	0.75	2	4.873		2	0	0
10.1007/s11263-008-0131-y	A unified curvature definition for regular polygonal and digital planar curves	INTERNATIONAL JOURNAL OF COMPUTER VISION	38	0.5	1	6.071		1	0	0
10.1016/j.artint.2011.09.003	Model-based multidimensional clustering of categorical data	ARTIFICIAL INTELLIGENCE	38	0.5	1	4.483		1	0	0
10.1016/j.patcog.2011.11.010	Contour-based object detection as dominant set computation	PATTERN RECOGNITION	38	0.25	1	5.898		1	0	0
10.1016/j.media.2015.05.009	Efficient multi-atlas abdominal segmentation on clinically acquired CT with SIMPLE context learning	MEDICAL IMAGE ANALYSIS	38	0.25	1	8.88		1	0	0
10.1016/j.knosys.2011.12.002	Frequent approximate subgraphs as features for graph-based image classification	KNOWLEDGE-BASED SYSTEMS	38	0.25	1	5.101		0	0	0
10.1016/j.patcog.2013.06.002	A feature construction method for general object recognition	PATTERN RECOGNITION	37	38.85	35	5.898		9	4	1
10.1016/j.eswa.2012.02.131	Which App? A recommender system of applications in markets: Implementation of the service for monitoring users' interaction	EXPERT SYSTEMS WITH APPLICATIONS	37	9	10	4.292		0	10	0
10.1016/j.eswa.2016.05.031	Combined influence of forearm orientation and muscular contraction on EMG pattern recognition	EXPERT SYSTEMS WITH APPLICATIONS	37	7.1	10	4.292		10	0	0
10.1016/j.eswa.2011.08.088	A tunable support vector machine assembly classifier for epileptic seizure detection	EXPERT SYSTEMS WITH APPLICATIONS	37	6	2	4.292		0	2	0
10.1016/j.cviu.2011.03.003	Detecting anomalies in people's trajectories using spectral graph analysis	COMPUTER VISION AND IMAGE UNDERSTANDING	37	6	2	2.645		0	2	0
10.1016/j.neucom.2008.01.033	Discovering speech phones using convolutive non-negative matrix factorisation with a sparseness constraint	NEUROCOMPUTING	37	6	4	4.072		0	4	0
10.1002/widm.1078	Large-scale data mining using genetics-based machine learning	WILEY INTERDISCIPLINARY REVIEWS-DATA MINING AND KNOWLEDGE DISCOVERY	37	5.95	5	2.541		3	0	0
10.1007/s10846-011-9588-y	Vision Based UAV Attitude Estimation: Progress and Insights	JOURNAL OF INTELLIGENT & ROBOTIC SYSTEMS	37	5.5	5	2.02		2	1	0
10.1016/j.neunet.2015.05.005	Many regression algorithms one unified model: A review	NEURAL NETWORKS	37	4.45	6	5.785		6	0	0
10.1016/j.artmed.2007.10.001	A de-identifier for medical discharge summaries	ARTIFICIAL INTELLIGENCE IN MEDICINE	37	3	1	3.574		0	1	0
10.1016/j.knosys.2012.01.008	A Fuzzy Grey Cognitive Maps-based Decision Support System for radiotherapy treatment planning	KNOWLEDGE-BASED SYSTEMS	37	3	1	5.101		0	0	0
10.1007/s11721-014-0095-1	A locally convergent rotationally invariant particle swarm optimization algorithm	SWARM INTELLIGENCE	37	3	1	2.208		0	0	0
10.1016/j.neucom.2011.12.007	An energy model approach to people counting for abnormal crowd behavior detection	NEUROCOMPUTING	37	3	1	4.072		0	1	0
10.1007/s10115-010-0375-z	Cluster-based instance selection for machine classification	KNOWLEDGE AND INFORMATION SYSTEMS	37	3	1	2.397		0	1	0
10.1016/j.artint.2010.12.005	Computer poker: A review	ARTIFICIAL INTELLIGENCE	37	3	1	4.483		0	0	0
10.1016/j.patcog.2012.12.015	Historical document image restoration using multispectral imaging system	PATTERN RECOGNITION	37	3	1	5.898		0	1	0
10.1016/j.patcog.2012.07.011	Image collection summarization via dictionary learning for sparse representation	PATTERN RECOGNITION	37	3	1	5.898		0	0	0
10.1007/s10115-009-0267-2	Methods for mining frequent items in data streams: an overview	KNOWLEDGE AND INFORMATION SYSTEMS	37	3	24	2.397		0	24	0
10.1016/j.eswa.2009.12.042	Prediction of Marshall test results for polypropylene modified dense bituminous mixtures using neural networks	EXPERT SYSTEMS WITH APPLICATIONS	37	3	1	4.292		0	0	0
10.1016/j.cviu.2009.07.006	Probabilistic structure matching for visual SLAM with a multi-camera rig	COMPUTER VISION AND IMAGE UNDERSTANDING	37	3	3	2.645		0	3	0
10.1016/j.aei.2008.06.009	Slow coherency and Angle Modulated Particle Swarm Optimization based islanding of large-scale power systems	ADVANCED ENGINEERING INFORMATICS	37	3	2	3.772		0	2	0
10.1016/j.cviu.2015.05.011	Hierarchical structure-and-motion recovery from uncalibrated images	COMPUTER VISION AND IMAGE UNDERSTANDING	37	2.1	3	2.645		3	0	0
10.1016/j.media.2015.08.009	A bi-ventricular cardiac atlas built from 1000+high resolution MR images of healthy subjects and an analysis of shape and motion	MEDICAL IMAGE ANALYSIS	37	2	3	8.88		3	0	0
10.1016/j.media.2014.05.005	An implicit sliding-motion preserving regularisation via bilateral filtering for deformable image registration	MEDICAL IMAGE ANALYSIS	37	2	2	8.88		2	0	0
10.1007/s10514-007-9074-3	Biologically-inspired robot spatial cognition based on rat neurophysiological studies	AUTONOMOUS ROBOTS	37	1.35	5	3.634		5	0	0
10.1016/j.knosys.2015.06.009	A knowledge-based expert system for assessing the performance level of green buildings	KNOWLEDGE-BASED SYSTEMS	37	1.25	2	5.101		2	0	0
10.1016/j.aei.2008.10.005	A vision-oriented approach for innovative product design	ADVANCED ENGINEERING INFORMATICS	37	1	1	3.772		1	0	0
10.1016/j.eswa.2014.03.016	An improved global-best harmony search algorithm for faster optimization	EXPERT SYSTEMS WITH APPLICATIONS	37	1	2	4.292		2	0	0
10.1016/j.eswa.2010.10.039	An OWA-TOPSIS method for multiple criteria decision analysis	EXPERT SYSTEMS WITH APPLICATIONS	37	1	1	4.292		0	0	0
10.1145/2382570.2382572	Comparison of Decision-Making Strategies for Self-Optimization in Autonomic Computing Systems	ACM TRANSACTIONS ON AUTONOMOUS AND ADAPTIVE SYSTEMS	37	1	1	2.66		1	0	0
10.1007/s10489-014-0540-2	FMAP: Distributed cooperative multi-agent planning	APPLIED INTELLIGENCE	37	1	3	2.882		3	0	0
10.1016/j.eswa.2012.10.001	Forecasting seasonal time series with computational intelligence: On recent methods and the potential of their combinations	EXPERT SYSTEMS WITH APPLICATIONS	37	1	1	4.292		1	0	0
10.1007/s10817-015-9330-8	MizAR 40 for Mizar 40	JOURNAL OF AUTOMATED REASONING	37	1	3	1.172		3	0	0
10.1016/j.eswa.2006.08.016	Structural equation model for effective CRM of digital content industry	EXPERT SYSTEMS WITH APPLICATIONS	37	1	1	4.292		1	0	0
10.1007/s10514-010-9202-3	Time-extended multi-robot coordination for domains with intra-path constraints	AUTONOMOUS ROBOTS	37	1	1	3.634		1	0	0
10.1016/j.patcog.2011.11.008	A unified dimensionality reduction framework for semi-paired and semi-supervised multi-view data	PATTERN RECOGNITION	37	0.75	2	5.898		2	0	0
10.1007/s10994-013-5335-x	From machine learning to machine reasoning An essay	MACHINE LEARNING	37	0.75	2	2.809		2	0	0
10.1016/j.eswa.2012.02.029	A new genetic algorithm for the asymmetric traveling salesman problem	EXPERT SYSTEMS WITH APPLICATIONS	37	0.5	3	4.292		3	0	0
10.1016/j.dss.2012.04.001	A novel risk assessment and optimisation model for a multi-objective network security countermeasure selection problem	DECISION SUPPORT SYSTEMS	37	0.5	1	3.847		1	0	0
10.1016/j.patcog.2015.09.015	An automated pattern recognition system for classifying indirect immunofluorescence images of HEp-2 cells and specimens	PATTERN RECOGNITION	37	0.5	1	5.898		1	0	0
10.1016/j.eswa.2013.12.042	Extractive single-document summarization based on genetic operators and guided local search	EXPERT SYSTEMS WITH APPLICATIONS	37	0.5	1	4.292		1	0	0
10.1016/j.artint.2013.02.001	Inconsistency measures for probabilistic logics	ARTIFICIAL INTELLIGENCE	37	0.5	1	4.483		1	0	0
10.1007/s12559-015-9370-8	Nature Inspired Computing: An Overview and Some Future Directions	COGNITIVE COMPUTATION	37	0.5	1	4.287		1	0	0
10.1016/j.eswa.2017.01.028	Trends in expert system development: A longitudinal content analysis of over thirty years of expert system case studies	EXPERT SYSTEMS WITH APPLICATIONS	37	0.5	1	4.292		1	0	0
10.1007/s00138-014-0612-7	Automatic plant identification from photographs	MACHINE VISION AND APPLICATIONS	37	0.25	1	1.788		0	0	0
10.1002/widm.16	Rough clustering	WILEY INTERDISCIPLINARY REVIEWS-DATA MINING AND KNOWLEDGE DISCOVERY	37	0.25	1	2.541		0	0	0
10.1016/j.websem.2015.01.003	Using a suite of ontologies for preserving workflow-centric research objects	JOURNAL OF WEB SEMANTICS	36	13.964	11	2.429		8	0	0
10.1016/j.cogsys.2015.12.002	Stigmergy as a universal coordination mechanism I: Definition and components	COGNITIVE SYSTEMS RESEARCH	36	10.05	17	1.384		16	0	0
10.1016/j.patcog.2011.04.010	Analysis of pattern recognition techniques for in-air signature biometrics	PATTERN RECOGNITION	36	10	1	5.898		0	0	1
10.1007/s10846-013-9834-6	Intelligent Coverage Path Planning for Agricultural Robots and Autonomous Machines on Three-Dimensional Terrain	JOURNAL OF INTELLIGENT & ROBOTIC SYSTEMS	36	9	3	2.02		0	3	0
10.1016/j.neunet.2015.09.011	Evolving spatio-temporal data machines based on the NeuCube neuromorphic framework: Design methodology and selected applications	NEURAL NETWORKS	36	8.45	20	5.785		20	0	0
10.1007/s10994-017-5633-9	Optimal classification trees	MACHINE LEARNING	36	6.55	10	2.809		10	0	0
10.1016/j.neucom.2014.09.074	Adaptive mobile activity recognition system with evolving data streams	NEUROCOMPUTING	36	6.5	32	4.072		32	0	0
10.1016/j.imavis.2008.03.007	Multi-focus color image fusion in the HSI space using the sum-modified-laplacian and a coarse edge map	IMAGE AND VISION COMPUTING	36	6	3	2.733		0	3	0
10.1016/j.dss.2007.09.006	A paradigmatic and methodological examination of knowledge management research: 2000 to 2004	DECISION SUPPORT SYSTEMS	36	5.08	1	3.847		0	0	0
10.1007/s00521-013-1481-0	Human-computer interaction using vision-based hand gesture recognition systems: a survey(Retracted article. See vol. 28 pg.849 2017)	NEURAL COMPUTING & APPLICATIONS	36	5.04	1	4.664		0	0	0
10.1016/j.patcog.2014.07.022	Multiple instance learning with bag dissimilarities	PATTERN RECOGNITION	36	3.5	5	5.898		4	0	0
10.1016/j.artint.2009.02.004	A case-based approach for coordinated action selection in robot soccer	ARTIFICIAL INTELLIGENCE	36	3	1	4.483		0	1	0
10.1016/j.neucom.2014.04.017	An online supervised learning method for spiking neural networks with adaptive structure	NEUROCOMPUTING	36	3	1	4.072		0	1	0
10.1016/j.artint.2011.06.003	Characterizing strong equivalence for argumentation frameworks	ARTIFICIAL INTELLIGENCE	36	3	1	4.483		0	0	0
10.1016/j.patcog.2008.05.010	Combining global regional and contextual features for automatic image annotation	PATTERN RECOGNITION	36	3	2	5.898		0	2	0
10.1016/j.patrec.2013.05.024	Context-based hand gesture recognition for the operating room	PATTERN RECOGNITION LETTERS	36	3	1	2.81		0	1	0
10.1016/j.ijar.2007.12.002	Decision trees as possibilistic classifiers	INTERNATIONAL JOURNAL OF APPROXIMATE REASONING	36	3	1	1.982		0	1	0
10.1016/j.knosys.2011.05.009	Finding association rules in semantic web data	KNOWLEDGE-BASED SYSTEMS	36	3	1	5.101		0	1	0
10.1016/j.patcog.2010.05.028	Learn(++).MF: A random subspace approach for the missing feature problem	PATTERN RECOGNITION	36	3	1	5.898		0	1	0
10.1007/s10994-014-5471-y	Meta-interpretive learning of higher-order dyadic datalog: predicate invention revisited	MACHINE LEARNING	36	3	1	2.809		0	0	0
10.1016/j.neucom.2012.06.031	Moment-based local binary patterns: A novel descriptor for invariant pattern recognition applications	NEUROCOMPUTING	36	3	1	4.072		0	1	0
10.1016/j.csl.2008.04.001	Natural language watermarking via morphosyntactic alterations	COMPUTER SPEECH AND LANGUAGE	36	3	1	1.857		0	1	0
10.1007/s10851-011-0259-1	On the Equivalence Between Hierarchical Segmentations and Ultrametric Watersheds	JOURNAL OF MATHEMATICAL IMAGING AND VISION	36	3	1	1.603		0	0	0
10.1016/j.patcog.2010.08.009	Realtime training on mobile devices for face recognition applications	PATTERN RECOGNITION	36	3	1	5.898		0	1	0
10.1007/s11263-012-0521-z	Shape-Based Object Detection via Boundary Structure Segmentation	INTERNATIONAL JOURNAL OF COMPUTER VISION	36	3	1	6.071		0	1	0
10.1016/j.eswa.2009.05.034	Supply chain network design using an integrated neuro-fuzzy and MILP approach: A comparative design study	EXPERT SYSTEMS WITH APPLICATIONS	36	3	2	4.292		0	2	0
10.1016/j.patcog.2008.06.004	The design of granular classifiers: A study in the synergy of interval calculus and fuzzy sets in pattern recognition	PATTERN RECOGNITION	36	3	1	5.898		0	1	0
10.1007/s10462-010-9179-5	The use of artificial intelligence based techniques for intrusion detection: a review	ARTIFICIAL INTELLIGENCE REVIEW	36	3	1	5.095		0	1	0
10.1007/s10514-007-9080-5	Top-down vs bottom-up methodologies in multi-agent system design	AUTONOMOUS ROBOTS	36	3	1	3.634		0	1	0
10.1007/s12652-009-0003-5	Towards evolutionary ambient assisted living systems	JOURNAL OF AMBIENT INTELLIGENCE AND HUMANIZED COMPUTING	36	3	1	1.91		0	0	0
10.1016/j.asoc.2009.10.011	Using fuzzy inference system for architectural space analysis	APPLIED SOFT COMPUTING	36	3	2	4.873		0	0	0
10.1016/j.neucom.2013.10.011	Fuzzy deep belief networks for semi-supervised sentiment classification	NEUROCOMPUTING	36	2.5	4	4.072		4	0	0
10.1007/s10851-010-0227-1	Periodic Plus Smooth Image Decomposition	JOURNAL OF MATHEMATICAL IMAGING AND VISION	36	2.25	4	1.603		4	0	0
10.1007/s10618-012-0253-2	Mining the Semantic Web Statistical learning for next generation knowledge bases	DATA MINING AND KNOWLEDGE DISCOVERY	36	2	2	2.879		2	0	0
10.1016/j.artmed.2017.02.001	Analysis of cancer-related IncRNAs using gene ontology and KEGG pathways	ARTIFICIAL INTELLIGENCE IN MEDICINE	36	1.25	4	3.574		4	0	0
10.1016/j.eswa.2014.01.017	Credal-C4.5: Decision tree based on imprecise probabilities to classify noisy data	EXPERT SYSTEMS WITH APPLICATIONS	36	1.25	2	4.292		1	0	0
10.1016/j.asoc.2016.08.041	A comprehensive review: Krill Herd algorithm (KH) and its applications	APPLIED SOFT COMPUTING	36	1	1	4.873		0	0	0
10.1016/j.neunet.2015.07.006	A decentralized training algorithm for Echo State Networks in distributed big data applications	NEURAL NETWORKS	36	1	1	5.785		1	0	0
10.1016/j.patcog.2012.10.024	A novel shape-based non-redundant local binary pattern descriptor for object detection	PATTERN RECOGNITION	36	1	1	5.898		1	0	0
10.1016/j.csl.2014.09.005	A survey on the application of recurrent neural networks to statistical language modeling	COMPUTER SPEECH AND LANGUAGE	36	1	2	1.857		2	0	0
10.1016/j.neucom.2014.05.044	Epileptic seizure detection by analyzing EEG signals using different transformation techniques	NEUROCOMPUTING	36	1	1	4.072		1	0	0
10.1016/j.ijar.2011.09.006	Learning Fuzzy Grey Cognitive Maps using Nonlinear Hebbian-based approach	INTERNATIONAL JOURNAL OF APPROXIMATE REASONING	36	1	1	1.982		1	0	0
10.1016/j.knosys.2015.07.019	MLSMOTE: Approaching imbalanced multilabel learning through synthetic instance generation	KNOWLEDGE-BASED SYSTEMS	36	1	2	5.101		2	0	0
10.1007/s10994-012-5281-z	PAMR: Passive aggressive mean reversion strategy for portfolio selection	MACHINE LEARNING	36	1	1	2.809		1	0	0
10.1016/j.asoc.2011.05.057	Research on CBR system based on data mining	APPLIED SOFT COMPUTING	36	1	1	4.873		1	0	0
10.1007/s10844-013-0247-6	The neglected user in music information retrieval research	JOURNAL OF INTELLIGENT INFORMATION SYSTEMS	36	1	1	1.589		1	0	0
10.1016/j.knosys.2012.09.002	Trust distrust and lack of confidence of users in online social media-sharing communities	KNOWLEDGE-BASED SYSTEMS	36	1	2	5.101		2	0	0
10.1016/j.dss.2008.11.019	An evolutionary-based decision support system for vehicle routing: The case of a public utility	DECISION SUPPORT SYSTEMS	36	0.75	8	3.847		8	0	0
10.1016/j.dss.2014.01.002	An efficacious method for detecting phishing webpages through target domain identification	DECISION SUPPORT SYSTEMS	36	0.5	1	3.847		1	0	0
10.1016/j.eswa.2015.09.050	An object-oriented approach for multi-objective flexible job-shop scheduling problem	EXPERT SYSTEMS WITH APPLICATIONS	36	0.5	1	4.292		1	0	0
10.1016/j.eswa.2013.08.047	Automatic text classification to support systematic reviews in medicine	EXPERT SYSTEMS WITH APPLICATIONS	36	0.5	1	4.292		1	0	0
10.1016/j.media.2011.05.006	Color treatment in endoscopic image classification using multi-scale local color vector patterns	MEDICAL IMAGE ANALYSIS	36	0.5	1	8.88		1	0	0
10.1016/j.knosys.2016.05.032	Contextual sentiment analysis for social media genres	KNOWLEDGE-BASED SYSTEMS	36	0.5	1	5.101		1	0	0
10.1016/j.eswa.2012.05.018	Employing transaction aggregation strategy to detect credit card fraud	EXPERT SYSTEMS WITH APPLICATIONS	36	0.5	1	4.292		1	0	0
10.1007/s12559-017-9493-1	Multi-Criteria Decision-Making Method Based on Distance Measure and Choquet Integral for Linguistic Z-Numbers	COGNITIVE COMPUTATION	36	0.5	1	4.287		1	0	0
10.1049/iet-bmt.2013.0049	On application of bloom filters to iris biometrics	IET BIOMETRICS	36	0.5	4	2.092		4	0	0
10.1007/s11721-010-0050-8	Swarm Cognition: an interdisciplinary approach to the study of self-organising biological collectives	SWARM INTELLIGENCE	36	0.5	1	2.208		1	0	0
10.1016/j.swevo.2011.07.001	Tuning of neural networks using particle swarm optimization to model MIG welding process	SWARM AND EVOLUTIONARY COMPUTATION	36	0.5	1	6.33		1	0	0
10.1016/j.eswa.2014.05.047	Construction scheduling using Genetic Algorithm based on Building Information Model	EXPERT SYSTEMS WITH APPLICATIONS	36	0.25	1	4.292		0	0	0
10.1016/j.neucom.2012.04.016	EOG artifact removal using a wavelet neural network	NEUROCOMPUTING	36	0.25	1	4.072		0	0	0
10.1016/j.neucom.2014.08.092	Feature learning from incomplete EEG with denoising autoencoder	NEUROCOMPUTING	36	0.25	1	4.072		1	0	0
10.1016/j.cviu.2013.10.013	TouchCut: Fast image and video segmentation using single-touch interaction	COMPUTER VISION AND IMAGE UNDERSTANDING	35	9	4	2.645		0	4	0
10.1016/j.eswa.2010.08.049	Application of relevance vector machine and survival probability to machine degradation assessment	EXPERT SYSTEMS WITH APPLICATIONS	35	6	2	4.292		0	2	0
10.1016/j.imavis.2007.05.005	Multi-modal tracking of people using laser scanners and video camera	IMAGE AND VISION COMPUTING	35	6	4	2.733		0	4	0
10.1016/j.patcog.2008.05.025	Object detection by global contour shape	PATTERN RECOGNITION	35	6	3	5.898		0	3	0
10.1007/s10115-009-0250-y	Short text similarity based on probabilistic topics	KNOWLEDGE AND INFORMATION SYSTEMS	35	6	2	2.397		0	2	0
10.1049/iet-ipr.2011.0472	Single image fog removal using anisotropic diffusion	IET IMAGE PROCESSING	35	6	2	2.004		0	2	0
10.1016/j.patcog.2010.01.023	Spoofing protection for fingerprint scanner by fusing ridge signal and valley noise	PATTERN RECOGNITION	35	6	2	5.898		0	2	0
10.1016/j.eswa.2014.02.045	An overview of ontologies and data resources in medical domains	EXPERT SYSTEMS WITH APPLICATIONS	35	5.8	10	4.292		10	0	0
10.1016/j.patrec.2015.10.013	Finely-grained annotated datasets for image-based plant phenotyping	PATTERN RECOGNITION LETTERS	35	5.55	9	2.81		9	0	0
10.1007/s11263-011-0498-z	Discriminative Appearance Models for Pictorial Structures	INTERNATIONAL JOURNAL OF COMPUTER VISION	35	4	5	6.071		0	1	0
10.1016/j.eswa.2008.02.047	An ontology-based business intelligence application in a financial knowledge management system	EXPERT SYSTEMS WITH APPLICATIONS	35	3	3	4.292		0	3	0
10.1007/s10817-008-9114-5	Backdoor Sets of Quantified Boolean Formulas	JOURNAL OF AUTOMATED REASONING	35	3	1	1.172		0	0	0
10.1007/s10846-014-0061-6	Development and Control of a Multifunctional Prosthetic Hand with Shape Memory Alloy Actuators	JOURNAL OF INTELLIGENT & ROBOTIC SYSTEMS	35	3	1	2.02		0	0	0
10.1016/j.patcog.2014.12.012	Fast incremental LDA feature extraction	PATTERN RECOGNITION	35	3	1	5.898		0	0	0
10.1016/j.patcog.2007.08.008	Fusing multimodal biometrics with quality estimates via a Bayesian belief network	PATTERN RECOGNITION	35	3	2	5.898		0	2	0
10.1016/j.patrec.2008.08.012	Improving the SIFT descriptor with smooth derivative filters	PATTERN RECOGNITION LETTERS	35	3	2	2.81		0	2	0
10.1016/j.eswa.2009.09.047	Integrating web mining and neural network for personalized e-commerce automatic service	EXPERT SYSTEMS WITH APPLICATIONS	35	3	1	4.292		0	1	0
10.1007/s11263-012-0600-1	Learning Vocabularies over a Fine Quantization	INTERNATIONAL JOURNAL OF COMPUTER VISION	35	3	1	6.071		0	1	0
10.1007/s11263-014-0741-5	Local Alignments for Fine-Grained Categorization	INTERNATIONAL JOURNAL OF COMPUTER VISION	35	3	1	6.071		0	1	0
10.1016/j.neunet.2014.05.002	Periodicity and dissipativity for memristor-based mixed time-varying delayed neural networks via differential inclusions	NEURAL NETWORKS	35	3	2	5.785		0	2	0
10.1007/s00138-007-0093-z	Self-identifying patterns for plane-based camera calibration	MACHINE VISION AND APPLICATIONS	35	3	2	1.788		0	2	0
10.1016/j.neucom.2015.03.017	Subset based deep learning for RGB-D object recognition	NEUROCOMPUTING	35	3	1	4.072		0	1	0
10.1016/j.artmed.2015.03.006	Sentiment analysis in medical settings: New opportunities and challenges	ARTIFICIAL INTELLIGENCE IN MEDICINE	35	2	3	3.574		2	0	0
10.1016/j.eswa.2014.11.063	Extending knowledge-driven activity models through data-driven learning techniques	EXPERT SYSTEMS WITH APPLICATIONS	35	1.85	2	4.292		2	0	0
10.1007/s12559-015-9320-5	Autonomous Driver Based on an Intelligent System of Decision-Making	COGNITIVE COMPUTATION	35	1.75	3	4.287		2	0	0
10.1007/s12559-012-9156-1	A Standardised Procedure for Evaluating Creative Systems: Computational Creativity Evaluation Based on What it is to be Creative	COGNITIVE COMPUTATION	35	1.5	2	4.287		2	0	0
10.1016/j.neucom.2011.09.040	An improved ant colony optimization and its application to vehicle routing problem with time windows	NEUROCOMPUTING	35	1.5	6	4.072		6	0	0
10.1016/j.media.2016.03.003	Hyper-connectivity of functional networks for brain disease diagnosis	MEDICAL IMAGE ANALYSIS	35	1.5	2	8.88		2	0	0
10.1016/j.neucom.2012.02.042	Image classification based on effective extreme learning machine	NEUROCOMPUTING	35	1.35	5	4.072		5	0	0
10.1016/j.csl.2013.09.002	A domain-independent statistical methodology for dialog management in spoken dialog systems	COMPUTER SPEECH AND LANGUAGE	35	1	1	1.857		1	0	0
10.1016/j.patcog.2014.03.028	A quantum Jensen-Shannon graph kernel for unattributed graphs	PATTERN RECOGNITION	35	1	1	5.898		1	0	0
10.1007/s12559-016-9395-7	Evolutionary Multitasking: A Computer Science View of Cognitive Multitasking	COGNITIVE COMPUTATION	35	1	3	4.287		3	0	0
10.1007/s00500-012-0859-8	Modelling experts' attitudes in group decision making	SOFT COMPUTING	35	1	2	2.784		2	0	0
10.1016/j.neunet.2016.08.008	Multistability of complex-valued neural networks with discontinuous activation functions	NEURAL NETWORKS	35	1	1	5.785		1	0	0
10.1016/j.knosys.2012.03.004	Online reputation management for improving marketing by using a hybrid MCDM model	KNOWLEDGE-BASED SYSTEMS	35	1	1	5.101		1	0	0
10.1007/s10514-013-9355-y	Stable grasping under pose uncertainty using tactile feedback	AUTONOMOUS ROBOTS	35	0.75	2	3.634		1	0	0
10.1016/j.inffus.2015.11.005	A centralized immune-Voronoi deployment algorithm for coverage maximization and energy conservation in mobile wireless sensor networks	INFORMATION FUSION	35	0.5	1	10.716		1	0	0
10.1007/s12559-014-9290-z	Development of a Socially Believable Multi-Robot Solution from Town to Home	COGNITIVE COMPUTATION	35	0.5	1	4.287		1	0	0
10.1007/s12559-017-9472-6	Ensemble of Deep Neural Networks with Probability-Based Fusion for Facial Expression Recognition	COGNITIVE COMPUTATION	35	0.5	1	4.287		1	0	0
10.1007/s12559-016-9442-4	On Global Smooth Path Planning for Mobile Robots using a Novel Multimodal Delayed PSO Algorithm	COGNITIVE COMPUTATION	35	0.5	1	4.287		1	0	0
10.1007/s12559-014-9302-z	Sentilo: Frame-Based Sentiment Analysis	COGNITIVE COMPUTATION	35	0.5	1	4.287		1	0	0
10.1007/s00521-011-0794-0	The analysis of discrete artificial bee colony algorithm with neighborhood operator on traveling salesman problem	NEURAL COMPUTING & APPLICATIONS	35	0.5	1	4.664		1	0	0
10.1016/j.patcog.2011.11.012	Efficient linear discriminant analysis with locality preserving for face recognition	PATTERN RECOGNITION	35	0.25	1	5.898		1	0	0
10.1016/j.dss.2012.10.050	Quality of health-related online search results	DECISION SUPPORT SYSTEMS	34	17	5	3.847		2	0	1
10.1007/s00138-016-0784-4	An overview of depth cameras and range scanners based on time-of-flight technologies	MACHINE VISION AND APPLICATIONS	34	9	4	1.788		0	4	0
10.1016/j.imavis.2008.09.005	Automatic 3D object segmentation in multiple views using volumetric graph-cuts	IMAGE AND VISION COMPUTING	34	9	13	2.733		0	13	0
10.1007/s00138-010-0289-5	Automatic real-time road marking recognition using a feature driven approach	MACHINE VISION AND APPLICATIONS	34	8.1	11	1.788		6	1	0
10.1016/j.eswa.2014.11.040	Using machine learning algorithms for housing price prediction: The case of Fairfax County Virginia housing data	EXPERT SYSTEMS WITH APPLICATIONS	34	7.8	22	4.292		21	0	0
10.1007/s11023-012-9281-3	The Superintelligent Will: Motivation and Instrumental Rationality in Advanced Artificial Agents	MINDS AND MACHINES	34	7	4	1.4		2	0	0
10.1007/s10994-011-5277-0	Experiment databases A new way to share organize and learn from experiments	MACHINE LEARNING	34	6.05	5	2.809		4	1	0
10.1016/j.aei.2012.01.003	Improving lifting motion planning and re-planning of cranes with consideration for safety and efficiency	ADVANCED ENGINEERING INFORMATICS	34	6	3	3.772		0	3	0
10.1137/110832380	Multiscale Mining of fMRI Data with Hierarchical Structured Sparsity	SIAM JOURNAL ON IMAGING SCIENCES	34	3.1	5	2.514		5	0	0
10.1016/j.patrec.2007.10.007	A new video segmentation method of moving objects based on blob-level knowledge	PATTERN RECOGNITION LETTERS	34	3	1	2.81		0	1	0
10.1016/j.patcog.2011.02.021	A spatially adaptive statistical method for the binarization of historical manuscripts and degraded document images	PATTERN RECOGNITION	34	3	1	5.898		0	1	0
10.1016/j.media.2009.12.001	Automatic detection of informative frames from wireless capsule endoscopy images	MEDICAL IMAGE ANALYSIS	34	3	2	8.88		0	2	0
10.1016/j.cviu.2009.08.004	Comparing compact codebooks for visual categorization	COMPUTER VISION AND IMAGE UNDERSTANDING	34	3	3	2.645		0	3	0
10.1016/j.eswa.2010.10.012	Design and development of logistics workflow systems for demand management with RFID	EXPERT SYSTEMS WITH APPLICATIONS	34	3	3	4.292		0	3	0
10.1016/j.asoc.2012.02.003	Fuzzy Grey Cognitive Maps in reliability engineering	APPLIED SOFT COMPUTING	34	3	1	4.873		0	0	0
10.1016/j.artint.2008.03.001	Imprecise probability trees: Bridging two theories of imprecise probability	ARTIFICIAL INTELLIGENCE	34	3	1	4.483		0	0	0
10.1080/09540090902733756	Information dynamics: patterns of expectation and surprise in the perception of music	CONNECTION SCIENCE	34	3	1	0.673		0	0	0
10.1016/j.neucom.2012.02.014	Model-based robust fault detection and isolation of an industrial gas turbine prototype using soft computing techniques	NEUROCOMPUTING	34	3	1	4.072		0	1	0
10.1016/j.eswa.2010.04.009	Motor shaft misalignment detection using multiscale entropy with wavelet denoising	EXPERT SYSTEMS WITH APPLICATIONS	34	3	1	4.292		0	1	0
10.1016/j.cviu.2010.02.003	Multiple objects tracking in the presence of long-term occlusions	COMPUTER VISION AND IMAGE UNDERSTANDING	34	3	2	2.645		0	2	0
10.1016/j.websem.2011.06.005	NCBO Resource Index: Ontology-based search and mining of biomedical resources	JOURNAL OF WEB SEMANTICS	34	3	1	2.429		0	1	0
10.1007/s10115-007-0105-3	Voting techniques for expert search	KNOWLEDGE AND INFORMATION SYSTEMS	34	3	1	2.397		0	1	0
10.1016/j.neucom.2014.05.094	Combining multiple clusterings via crowd agreement estimation and multi-granularity link analysis	NEUROCOMPUTING	34	2	8	4.072		7	0	0
10.3389/fnbot.2014.00024	A comparative analysis of three non-invasive human-machine interfaces for the disabled	FRONTIERS IN NEUROROBOTICS	34	1.75	3	3		3	0	0
10.1016/j.patcog.2016.07.016	Bacterial colony counting with Convolutional Neural Networks in Digital Microbiology Imaging	PATTERN RECOGNITION	34	1.75	3	5.898		3	0	0
10.1016/j.patcog.2017.03.012	Unsupervised hierarchical image segmentation through fuzzy entropy maximization	PATTERN RECOGNITION	34	1.5	2	5.898		2	0	0
10.1016/j.inffus.2009.09.007	A multi-agent systems approach to distributed bayesian information fusion	INFORMATION FUSION	34	1	1	10.716		1	0	0
10.1016/j.asoc.2016.12.024	An evaluation of Convolutional Neural Networks for music classification using spectrograms	APPLIED SOFT COMPUTING	34	1	1	4.873		1	0	0
10.1016/j.imavis.2016.06.007	From handcrafted to learned representations for human action recognition: A survey	IMAGE AND VISION COMPUTING	34	1	1	2.733		1	0	0
10.1016/j.media.2014.09.007	Joint 3-D vessel segmentation and centerline extraction using oblique Hough forests with steerable filters	MEDICAL IMAGE ANALYSIS	34	1	1	8.88		1	0	0
10.1016/j.artint.2016.07.005	NASARI: Integrating explicit knowledge and corpus statistics for a multilingual representation of concepts and entities	ARTIFICIAL INTELLIGENCE	34	1	1	4.483		1	0	0
10.1007/s12559-013-9229-9	On Automatic Diagnosis of Alzheimer's Disease Based on Spontaneous Speech Analysis and Emotional Temperature	COGNITIVE COMPUTATION	34	1	1	4.287		1	0	0
10.1016/j.aei.2014.06.001	Processing of Topological BIM Queries using Boundary Representation Based Methods	ADVANCED ENGINEERING INFORMATICS	34	1	1	3.772		1	0	0
10.1016/j.dss.2013.01.001	Selection of optimal countermeasure portfolio in IT security planning	DECISION SUPPORT SYSTEMS	34	1	1	3.847		1	0	0
10.1016/j.eswa.2015.04.060	Taxi and Ride Sharing: A Dynamic Dial-a-Ride Problem with Money as an Incentive	EXPERT SYSTEMS WITH APPLICATIONS	34	1	1	4.292		1	0	0
10.1016/j.patrec.2008.06.001	A new hybrid ant colony optimization algorithm for the vehicle routing problem	PATTERN RECOGNITION LETTERS	34	0.75	3	2.81		3	0	0
10.1007/s10514-015-9525-1	A real-time method for depth enhanced visual odometry	AUTONOMOUS ROBOTS	34	0.75	2	3.634		1	0	0
10.1016/j.eswa.2008.10.040	A well-scalable metaheuristic for the fleet size and mix vehicle routing problem with time windows	EXPERT SYSTEMS WITH APPLICATIONS	34	0.5	2	4.292		2	0	0
10.1016/j.asoc.2012.07.021	An initial seed selection algorithm for k-means clustering of georeferenced data to improve replicability of cluster assignments for mapping application	APPLIED SOFT COMPUTING	34	0.5	2	4.873		2	0	0
10.1016/j.imavis.2014.06.001	Automatic audiovisual behavior descriptors for psychological disorder analysis	IMAGE AND VISION COMPUTING	34	0.5	3	2.733		3	0	0
10.1016/j.patcog.2013.09.023	Facial expression recognition in dynamic sequences: An integrated approach	PATTERN RECOGNITION	34	0.5	1	5.898		1	0	0
10.1007/s12559-013-9224-1	Fast Face Recognition Via Sparse Coding and Extreme Learning Machine	COGNITIVE COMPUTATION	34	0.5	1	4.287		1	0	0
10.1007/s10472-012-9329-3	Relational concept analysis: mining concept lattices from multi-relational data	ANNALS OF MATHEMATICS AND ARTIFICIAL INTELLIGENCE	34	0.5	2	1.011		2	0	0
10.1016/j.artint.2012.06.008	Transforming Wikipedia into a large scale multilingual concept network	ARTIFICIAL INTELLIGENCE	34	0.5	1	4.483		1	0	0
10.1007/s10115-016-0922-3	Cloud resource provisioning: survey status and future research directions	KNOWLEDGE AND INFORMATION SYSTEMS	34	0.25	1	2.397		1	0	0
10.1007/s00500-014-1455-x	Hybrid ant colony optimization in solving multi-skill resource-constrained project scheduling problem	SOFT COMPUTING	34	0.25	2	2.784		2	0	0
10.1016/j.eswa.2010.12.141	Incremental SVM based on reserved set for network intrusion detection	EXPERT SYSTEMS WITH APPLICATIONS	34	0.25	1	4.292		0	0	0
10.1016/j.knosys.2011.12.005	Predicting customer churn through interpersonal influence	KNOWLEDGE-BASED SYSTEMS	34	0.25	1	5.101		1	0	0
10.1007/s10994-013-5346-7	Using random forests to diagnose aviation turbulence	MACHINE LEARNING	33	17.58	6	2.809		4	0	1
10.1177/1059712311421219	A review of long-term memory in natural and synthetic systems	ADAPTIVE BEHAVIOR	33	10	2	1.362		0	0	1
10.1016/j.neucom.2014.05.022	Robust latent low rank representation for subspace clustering	NEUROCOMPUTING	33	9	1	4.072		0	0	0
10.1016/j.eswa.2012.02.120	Sentic PROMs: Application of sentic computing to the development of a novel unified framework for measuring health-care quality	EXPERT SYSTEMS WITH APPLICATIONS	33	8.6	8	4.292		4	1	0
10.1007/s10618-010-0180-z	Web robot detection techniques: overview and limitations	DATA MINING AND KNOWLEDGE DISCOVERY	33	6.064	1	2.879		0	0	0
10.1080/18756891.2012.696922	Analysis of Neighbourhoods in Multi-layered Dynamic Social Networks	INTERNATIONAL JOURNAL OF COMPUTATIONAL INTELLIGENCE SYSTEMS	33	6	4	2.153		3	0	0
10.1016/j.csl.2009.03.005	Harnessing graphics processors for the fast computation of acoustic likelihoods in speech recognition	COMPUTER SPEECH AND LANGUAGE	33	6	2	1.857		0	2	0
10.1145/1889681.1889688	Inferring Colocation and Conversation Networks from Privacy-Sensitive Audio with Implications for Computational Social Science	ACM TRANSACTIONS ON INTELLIGENT SYSTEMS AND TECHNOLOGY	33	6	5	2.861		0	5	0
10.1016/j.eswa.2013.02.009	Intelligent phishing detection and protection scheme for online transactions	EXPERT SYSTEMS WITH APPLICATIONS	33	6	3	4.292		0	3	0
10.1016/j.patcog.2010.12.014	Model-based segmentation and recognition of dynamic gestures in continuous video streams	PATTERN RECOGNITION	33	6	2	5.898		0	2	0
10.1016/j.cogsys.2007.11.001	Neural affective decision theory: Choices brains and emotions	COGNITIVE SYSTEMS RESEARCH	33	3.5	2	1.384		1	1	0
10.1016/j.media.2010.09.002	A magnetic resonance spectroscopy driven initialization scheme for active shape model based prostate segmentation	MEDICAL IMAGE ANALYSIS	33	3.25	2	8.88		0	1	0
10.1007/s12193-015-0182-7	A survey of assistive technologies and applications for blind users on mobile platforms: a review and foundation for research	JOURNAL ON MULTIMODAL USER INTERFACES	33	3.05	4	2.02		4	0	0
10.1016/j.knosys.2008.03.016	A compound framework for sports results prediction: A football case study	KNOWLEDGE-BASED SYSTEMS	33	3	2	5.101		0	2	0
10.1016/j.asoc.2011.03.028	A dynamic system model of biogeography-based optimization	APPLIED SOFT COMPUTING	33	3	1	4.873		0	0	0
10.1016/j.imavis.2013.01.003	A text reading algorithm for natural images	IMAGE AND VISION COMPUTING	33	3	1	2.733		0	1	0
10.1007/s10844-008-0053-8	An adaptive personalized news dissemination system	JOURNAL OF INTELLIGENT INFORMATION SYSTEMS	33	3	2	1.589		0	2	0
10.1016/j.dss.2010.12.001	An evolutionary real options framework for the design and management of projects and systems with complex real options and exercising conditions	DECISION SUPPORT SYSTEMS	33	3	2	3.847		0	0	0
10.1016/j.eswa.2007.11.012	Application of extension theory in misfire fault diagnosis of gasoline engines	EXPERT SYSTEMS WITH APPLICATIONS	33	3	1	4.292		0	0	0
10.1016/j.eswa.2007.07.049	Business intelligence approach to supporting strategy-making of ISP service management	EXPERT SYSTEMS WITH APPLICATIONS	33	3	1	4.292		0	1	0
10.1016/j.media.2007.08.001	Colon polyp detection using smoothed shape operators: Preliminary results	MEDICAL IMAGE ANALYSIS	33	3	1	8.88		0	1	0
10.1016/j.patcog.2009.12.018	Cooperative clustering	PATTERN RECOGNITION	33	3	1	5.898		0	0	0
10.1007/s10032-011-0168-2	CVC-MUSCIMA: a ground truth of handwritten music score images for writer identification and staff removal	INTERNATIONAL JOURNAL ON DOCUMENT ANALYSIS AND RECOGNITION	33	3	1	0.846		0	0	0
10.1016/j.dss.2007.05.005	Decision support for team staffing: An automated relational recommendation approach	DECISION SUPPORT SYSTEMS	33	3	2	3.847		0	2	0
10.1016/j.neucom.2016.09.117	Ensemble application of convolutional neural networks and multiple kernel learning for multimodal sentiment analysis	NEUROCOMPUTING	33	3	1	4.072		0	0	0
10.1016/j.eswa.2010.03.032	Evaluation of e-learning systems based on fuzzy clustering models and statistical tools	EXPERT SYSTEMS WITH APPLICATIONS	33	3	1	4.292		0	1	0
10.1007/s10851-007-0036-3	Generalized Fourier descriptors with applications to objects recognition in SVM context	JOURNAL OF MATHEMATICAL IMAGING AND VISION	33	3	1	1.603		0	1	0
10.1049/iet-cvi.2009.0127	Improving Harris corner selection strategy	IET COMPUTER VISION	33	3	1	1.648		0	1	0
10.1007/s10845-009-0289-3	Integrating lean and other strategies for mass customization manufacturing: a case study	JOURNAL OF INTELLIGENT MANUFACTURING	33	3	1	3.535		0	1	0
10.1007/s11263-011-0445-z	Modeling and Recognition of Landmark Image Collections Using Iconic Scene Graphs	INTERNATIONAL JOURNAL OF COMPUTER VISION	33	3	1	6.071		0	1	0
10.1016/j.asoc.2008.03.007	Non-Mercer hybrid kernel for linear programming support vector regression in nonlinear systems identification	APPLIED SOFT COMPUTING	33	3	2	4.873		0	2	0
10.1007/s10115-009-0222-2	Sentiment-oriented contextual advertising	KNOWLEDGE AND INFORMATION SYSTEMS	33	3	4	2.397		0	4	0
10.1016/j.media.2011.02.007	The evaluation of single-view and multi-view fusion 3D echocardiography using image-driven segmentation and tracking	MEDICAL IMAGE ANALYSIS	33	3	1	8.88		0	1	0
10.1007/s10514-015-9485-5	Aerial robotic contact-based inspection: planning and control	AUTONOMOUS ROBOTS	33	2.85	5	3.634		3	0	0
10.1007/s10618-014-0349-y	Learning a symbolic representation for multivariate time series classification	DATA MINING AND KNOWLEDGE DISCOVERY	33	2	2	2.879		2	0	0
10.1016/j.eswa.2012.10.031	Content presentation personalisation and media adaptation in tourism web sites using Fuzzy Delphi Method and Fuzzy Cognitive Maps	EXPERT SYSTEMS WITH APPLICATIONS	33	1.85	2	4.292		2	0	0
10.1016/j.eswa.2012.01.169	Modeling emergency evacuation of individuals with disabilities (exitus): An agent-based public decision support system	EXPERT SYSTEMS WITH APPLICATIONS	33	1.85	4	4.292		4	0	0
10.1007/s12559-014-9304-x	How to Measure Cerebral Correlates of Emotions in Marketing Relevant Tasks	COGNITIVE COMPUTATION	33	1.5	2	4.287		2	0	0
10.1016/j.neucom.2011.03.006	Robotic path planning in static environment using hierarchical multi-neuron heuristic search and probability based fitness	NEUROCOMPUTING	33	1.25	2	4.072		0	0	0
10.1016/j.eswa.2013.12.041	A similarity-based approach for data stream classification	EXPERT SYSTEMS WITH APPLICATIONS	33	1	2	4.292		2	0	0
10.1016/j.imavis.2015.11.004	Approaching human level facial landmark localization by deep learning	IMAGE AND VISION COMPUTING	33	1	1	2.733		1	0	0
10.1016/j.asoc.2012.05.015	Dynamic rough clustering and its applications	APPLIED SOFT COMPUTING	33	1	1	4.873		1	0	0
10.1016/j.neunet.2012.09.015	Intrinsically motivated action-outcome learning and goal-based action recall: A system-level bio-constrained computational model	NEURAL NETWORKS	33	1	3	5.785		0	0	0
10.1016/j.eswa.2010.12.131	Moderating effects of technology acceptance perspectives on e-service quality formation: Evidence from airline websites in Taiwan	EXPERT SYSTEMS WITH APPLICATIONS	33	1	1	4.292		1	0	0
10.1002/widm.1108	Multidimensional compressed sensing and their applications	WILEY INTERDISCIPLINARY REVIEWS-DATA MINING AND KNOWLEDGE DISCOVERY	33	1	1	2.541		1	0	0
10.1016/j.neunet.2012.05.003	Online learning and generalization of parts-based image representations by non-negative sparse autoencoders	NEURAL NETWORKS	33	1	1	5.785		0	0	0
10.1016/j.eswa.2012.01.136	Online named entity recognition method for microtexts in social networking services: A case study of twitter	EXPERT SYSTEMS WITH APPLICATIONS	33	1	1	4.292		1	0	0
10.1016/j.neucom.2014.07.052	An efficient Self-Organizing Active Contour model for image segmentation	NEUROCOMPUTING	33	0.75	14	4.072		14	0	0
10.1016/j.neucom.2013.07.004	Does restraining end effect matter in EMD-based modeling framework for time series prediction? Some experimental evidences	NEUROCOMPUTING	33	0.75	3	4.072		3	0	0
10.1016/j.cviu.2015.08.005	MODS: Fast and robust method for two-view matching	COMPUTER VISION AND IMAGE UNDERSTANDING	33	0.75	3	2.645		3	0	0
10.1016/j.artmed.2016.09.001	A review on brain structures segmentation in magnetic resonance imaging	ARTIFICIAL INTELLIGENCE IN MEDICINE	33	0.5	1	3.574		1	0	0
10.1016/j.dss.2013.04.004	Cyber-risk decision models: To insure IT or not?	DECISION SUPPORT SYSTEMS	33	0.5	1	3.847		1	0	0
10.1016/j.eswa.2010.11.098	Data mining for adaptive learning in a TESL-based e-learning system	EXPERT SYSTEMS WITH APPLICATIONS	33	0.5	2	4.292		0	0	0
10.1016/j.knosys.2015.09.024	Sensor-based human activity recognition system with a multilayered model using time series shapelets	KNOWLEDGE-BASED SYSTEMS	33	0.5	1	5.101		1	0	0
10.1016/j.eswa.2014.02.038	Social network user influence sense-making and dynamics prediction	EXPERT SYSTEMS WITH APPLICATIONS	33	0.5	2	4.292		2	0	0
10.1016/j.patcog.2014.06.010	Uncooperative gait recognition by learning to rank	PATTERN RECOGNITION	33	0.5	1	5.898		1	0	0
10.1016/j.dss.2011.10.017	Using online search data to forecast new product sales	DECISION SUPPORT SYSTEMS	33	0.5	1	3.847		1	0	0
10.1016/j.imavis.2012.02.007	3D human face description: landmarks measures and geometrical features	IMAGE AND VISION COMPUTING	33	0.25	1	2.733		0	0	0
10.1016/j.eswa.2009.06.077	A note on the truck and trailer routing problem	EXPERT SYSTEMS WITH APPLICATIONS	33	0.25	2	4.292		2	0	0
10.1007/s10462-010-9159-9	A Survey of artificial immune applications	ARTIFICIAL INTELLIGENCE REVIEW	33	0.25	1	5.095		0	0	0
10.1016/j.asoc.2011.08.054	Interactive Genetic Algorithm with Mixed Initiative Interaction for multi-criteria ground water monitoring design	APPLIED SOFT COMPUTING	33	0.25	3	4.873		3	0	0
10.1016/j.eswa.2011.01.129	Modified genetic algorithms for manufacturing process planning in multiple parts manufacturing lines	EXPERT SYSTEMS WITH APPLICATIONS	33	0.25	10	4.292		10	0	0
10.1016/j.eswa.2012.03.041	Segmenting visitors of cultural events by motivation: A sequential non-linear clustering analysis of Italian Christmas Market visitors	EXPERT SYSTEMS WITH APPLICATIONS	33	0.25	1	4.292		0	0	0
10.1016/j.imavis.2016.01.006	Violence detection using Oriented VIolent Flows	IMAGE AND VISION COMPUTING	33	0.25	1	2.733		1	0	0
10.1016/j.dss.2012.12.035	Should I send this message? Understanding the impact of interruptions social hierarchy and perceived task complexity on user performance and perceived workload	DECISION SUPPORT SYSTEMS	32	114.58	18	3.847		3	0	13
10.1007/s11721-010-0049-1	Termites as models of swarm cognition	SWARM INTELLIGENCE	32	31	4	2.208		0	0	3
10.1016/j.artint.2010.11.026	Robot ethics: Mapping the issues for a mechanized world	ARTIFICIAL INTELLIGENCE	32	15.65	7	4.483		5	0	0
10.1016/j.websem.2012.02.003	Emerging practices for mapping and linking life sciences data using RDF - A case series	JOURNAL OF WEB SEMANTICS	32	13.238	10	2.429		5	0	0
10.1016/j.websem.2013.05.001	Key choices in the design of Simple Knowledge Organization System (SKOS)	JOURNAL OF WEB SEMANTICS	32	11.3	13	2.429		12	0	0
10.1016/j.artmed.2013.03.004	A pilot study of distributed knowledge management and clinical decision support in the cloud	ARTIFICIAL INTELLIGENCE IN MEDICINE	32	8.55	14	3.574		13	0	0
10.1016/j.patrec.2016.06.012	Representation learning for very short texts using weighted word embedding aggregation	PATTERN RECOGNITION LETTERS	32	8.3	12	2.81		11	0	0
10.1016/j.media.2011.02.003	A smart atlas for endomicroscopy using automated video retrieval	MEDICAL IMAGE ANALYSIS	32	6	2	8.88		0	2	0
10.1016/j.neucom.2007.07.035	Estimating the mixing matrix in Sparse Component Analysis (SCA) based on partial k-dimensional subspace clustering	NEUROCOMPUTING	32	6	3	4.072		0	3	0
10.1016/j.eswa.2010.11.066	Multi-objective uniform design as a SVM model selection tool for face recognition	EXPERT SYSTEMS WITH APPLICATIONS	32	6	5	4.292		0	5	0
10.1016/j.patcog.2013.06.014	ROC curves for regression	PATTERN RECOGNITION	32	5.75	3	5.898		0	0	0
10.1007/s11047-012-9334-9	A novel text and image encryption method based on chaos theory and DNA computing	NATURAL COMPUTING	32	4.25	3	1.33		1	0	0
10.1016/j.media.2013.04.013	Neighbourhood approximation using randomized forests	MEDICAL IMAGE ANALYSIS	32	4	3	8.88		2	1	0
10.1016/j.neucom.2007.09.023	Fusing gait and face cues for human gender recognition	NEUROCOMPUTING	32	3.25	2	4.072		0	1	0
10.1016/j.artmed.2009.05.002	A comparison of three computational modelling methods for the prediction of virological response to combination HIV therapy	ARTIFICIAL INTELLIGENCE IN MEDICINE	32	3	1	3.574		0	0	0
10.1016/j.media.2007.10.007	A method for vector displacement estimation with ultrasound imaging and its application for thyroid nodular disease	MEDICAL IMAGE ANALYSIS	32	3	1	8.88		0	1	0
10.1016/j.eswa.2008.10.086	Automatic calibration of a rainfall-runoff model using a fast and elitist multi-objective particle swarm algorithm	EXPERT SYSTEMS WITH APPLICATIONS	32	3	2	4.292		0	0	0
10.1007/s10844-011-0191-2	Catching a viral video	JOURNAL OF INTELLIGENT INFORMATION SYSTEMS	32	3	1	1.589		0	0	0
10.1007/s10115-014-0784-5	Classification of multivariate time series via temporal abstraction and time intervals mining	KNOWLEDGE AND INFORMATION SYSTEMS	32	3	1	2.397		0	0	0
10.1007/s10618-014-0380-z	Classification-driven temporal discretization of multivariate time series	DATA MINING AND KNOWLEDGE DISCOVERY	32	3	1	2.879		0	0	0
10.1007/s10844-011-0183-2	Community-based anomaly detection in evolutionary networks	JOURNAL OF INTELLIGENT INFORMATION SYSTEMS	32	3	3	1.589		0	3	0
10.1016/j.eswa.2009.09.066	Competition between high-speed and conventional rail systems: A game theoretical approach	EXPERT SYSTEMS WITH APPLICATIONS	32	3	1	4.292		0	0	0
10.1016/j.patcog.2011.03.016	Content-based image retrieval with relevance feedback using random walks	PATTERN RECOGNITION	32	3	1	5.898		0	1	0
10.1007/s10489-010-0238-z	Dynamic planning approach to automated web service composition	APPLIED INTELLIGENCE	32	3	1	2.882		0	1	0
10.1007/s10115-011-0400-x	Early classification on time series	KNOWLEDGE AND INFORMATION SYSTEMS	32	3	1	2.397		0	1	0
10.1016/j.media.2012.05.012	Efficient globally optimal segmentation of cells in fluorescence microscopy images using level sets and convex energy functionals	MEDICAL IMAGE ANALYSIS	32	3	1	8.88		0	1	0
10.1007/s11263-010-0342-x	Fast PRISM: Branch and Bound Hough Transform for Object Class Detection	INTERNATIONAL JOURNAL OF COMPUTER VISION	32	3	1	6.071		0	1	0
10.1007/s10618-009-0125-6	iSAX: disk-aware mining and indexing of massive time series datasets	DATA MINING AND KNOWLEDGE DISCOVERY	32	3	1	2.879		0	1	0
10.1016/j.websem.2013.05.001	Key choices in the design of Simple Knowledge Organization System (SKOS)	JOURNAL OF WEB SEMANTICS	32	3	1	2.429		0	0	0
10.1007/s11263-010-0412-0	Skeleton Search: Category-Specific Object Recognition and Segmentation Using a Skeletal Shape Model	INTERNATIONAL JOURNAL OF COMPUTER VISION	32	3	1	6.071		0	1	0
10.1016/j.knosys.2016.01.027	Tensor-based anomaly detection: An interdisciplinary survey	KNOWLEDGE-BASED SYSTEMS	32	3	1	5.101		0	0	0
10.1016/j.datak.2007.06.011	The applicability of the perturbation based privacy preserving data mining for real-world data	DATA & KNOWLEDGE ENGINEERING	32	3	1	1.583		0	1	0
10.1007/s10514-015-9516-2	Unsupervised learning to detect loops using deep neural networks for visual SLAM system	AUTONOMOUS ROBOTS	32	2.6	4	3.634		3	0	0
10.1016/j.patcog.2016.10.009	Multi-modal classification of Alzheimer's disease using nonlinear graph fusion	PATTERN RECOGNITION	32	2.5	6	5.898		6	0	0
10.1016/j.neucom.2014.05.028	Deep self-taught learning for facial beauty prediction	NEUROCOMPUTING	32	2.35	5	4.072		1	0	0
10.1016/j.dss.2016.02.013	Stock market sentiment lexicon acquisition using microblogging data and statistical measures	DECISION SUPPORT SYSTEMS	32	2.25	3	3.847		3	0	0
10.1007/s10514-014-9383-2	Autonomous robotic capture of non-cooperative target using visual servoing and motion predictive control	AUTONOMOUS ROBOTS	32	2.1	4	3.634		3	0	0
10.1016/j.patrec.2015.10.008	Weak supervision and other non-standard classification problems: A taxonomy	PATTERN RECOGNITION LETTERS	32	2	2	2.81		2	0	0
10.1016/j.neucom.2014.02.061	Self-organization and missing values in SOM and GTM	NEUROCOMPUTING	32	1.85	2	4.072		2	0	0
10.1016/j.knosys.2014.12.011	Correcting noisy ratings in collaborative recommender systems	KNOWLEDGE-BASED SYSTEMS	32	1.5	3	5.101		3	0	0
10.1016/j.bica.2012.04.005	Distributed Adaptive Control: A theory of the Mind Brain Body Nexus	BIOLOGICALLY INSPIRED COGNITIVE ARCHITECTURES	32	1.35	2	1.597		2	0	0
10.1016/j.eswa.2010.08.126	A Web page classification system based on a genetic algorithm using tagged-terms as features	EXPERT SYSTEMS WITH APPLICATIONS	32	1.1	6	4.292		6	0	0
10.1016/j.asoc.2013.10.011	An integrated approach to automated innovization for discovering useful design principles: Case studies from engineering	APPLIED SOFT COMPUTING	32	1	1	4.873		1	0	0
10.1007/s10514-014-9390-3	Energy-optimal trajectory planning for car-like robots	AUTONOMOUS ROBOTS	32	0.75	2	3.634		1	0	0
10.1016/j.patcog.2016.08.017	A partial Hadamard transform approach to the design of cancelable fingerprint templates containing binary biometric representations	PATTERN RECOGNITION	32	0.5	1	5.898		1	0	0
10.1016/j.dss.2011.07.003	A text-based decision support system for financial sequence prediction	DECISION SUPPORT SYSTEMS	32	0.5	1	3.847		1	0	0
10.1016/j.csl.2013.09.003	Computational approaches to subjectivity and sentiment analysis: Present and envisaged methods and applications	COMPUTER SPEECH AND LANGUAGE	32	0.5	1	1.857		1	0	0
10.1016/j.dss.2013.01.013	Finance sourcing in a supply chain	DECISION SUPPORT SYSTEMS	32	0.5	1	3.847		1	0	0
10.1016/j.media.2016.09.002	Novel and powerful 3D adaptive crisp active contour method applied in the segmentation of CT lung images	MEDICAL IMAGE ANALYSIS	32	0.5	1	8.88		1	0	0
10.1016/j.patcog.2015.04.004	Plant identification using leaf shapes-A pattern counting approach	PATTERN RECOGNITION	32	0.5	1	5.898		1	0	0
10.1016/j.neucom.2012.12.021	Tagging photos using users' vocabularies	NEUROCOMPUTING	32	0.5	1	4.072		1	0	0
10.1049/iet-ipr.2010.0127	Visual tracking via bag of features	IET IMAGE PROCESSING	32	0.5	1	2.004		1	0	0
10.1016/j.dss.2011.08.003	An elusive antecedent of superior firm performance: The knowledge management factor	DECISION SUPPORT SYSTEMS	32	0.25	1	3.847		1	0	0
10.1016/j.knosys.2013.06.015	Computing semantic relatedness using Wikipedia features	KNOWLEDGE-BASED SYSTEMS	32	0.25	1	5.101		1	0	0
10.1016/j.asoc.2011.08.033	High dynamic range optimal fuzzy color image enhancement using Artificial Ant Colony System	APPLIED SOFT COMPUTING	32	0.25	1	4.873		0	0	0
10.1016/j.eswa.2013.07.024	Adoption of RFID technologies in UK logistics: Moderating roles of size barcode experience and government support	EXPERT SYSTEMS WITH APPLICATIONS	31	11.25	3	4.292		1	0	1
10.1016/j.dss.2017.04.003	Predicting process behaviour using deep learning	DECISION SUPPORT SYSTEMS	31	10.2	24	3.847		24	0	0
10.1007/s10851-012-0342-2	Automatic Radial Distortion Estimation from a Single Image	JOURNAL OF MATHEMATICAL IMAGING AND VISION	31	9	3	1.603		0	2	0
10.1016/j.media.2009.01.004	Directional functions for orientation distribution estimation	MEDICAL IMAGE ANALYSIS	31	9	3	8.88		0	3	0
10.1016/j.eswa.2017.05.039	Deep learning for biological image classification	EXPERT SYSTEMS WITH APPLICATIONS	31	8	3	4.292		0	0	3
10.1016/j.media.2017.04.010	Slice-to-volume medical image registration: A survey	MEDICAL IMAGE ANALYSIS	31	7.8	22	8.88		21	0	0
10.1016/j.patrec.2010.09.019	Fundamental matrix estimation A study of error criteria	PATTERN RECOGNITION LETTERS	31	7.25	9	2.81		4	3	0
10.1016/j.patrec.2015.04.009	What are the true clusters?	PATTERN RECOGNITION LETTERS	31	6.25	13	2.81		13	0	0
10.1002/widm.1132	Active learning with support vector machines	WILEY INTERDISCIPLINARY REVIEWS-DATA MINING AND KNOWLEDGE DISCOVERY	31	6	2	2.541		0	2	0
10.1016/j.eswa.2007.07.017	Road-traffic monitoring by knowledge-driven static and dynamic image analysis	EXPERT SYSTEMS WITH APPLICATIONS	31	6	2	4.292		0	2	0
10.1016/j.cviu.2008.01.007	Tracking the soccer ball using multiple fixed cameras	COMPUTER VISION AND IMAGE UNDERSTANDING	31	6	4	2.645		0	4	0
10.1007/s10994-011-5276-1	Compressed labeling on distilled labelsets for multi-label learning	MACHINE LEARNING	31	5	2	2.809		0	0	0
10.1016/j.dss.2012.06.007	An event-driven optimization framework for dynamic vehicle routing	DECISION SUPPORT SYSTEMS	31	3.5	2	3.847		1	1	0
10.1007/s10514-009-9110-6	A generative framework for fast urban labeling using spatial and temporal context	AUTONOMOUS ROBOTS	31	3	1	3.634		0	1	0
10.1016/j.patrec.2011.03.022	A survey and experimental evaluation of image spam filtering techniques	PATTERN RECOGNITION LETTERS	31	3	2	2.81		0	0	0
10.1016/j.patcog.2007.11.024	Activity based surveillance video content modelling	PATTERN RECOGNITION	31	3	7	5.898		0	7	0
10.1016/j.eswa.2008.10.050	Cooperative learning in E-learning: A peer assessment of student-centered using consistent fuzzy preference	EXPERT SYSTEMS WITH APPLICATIONS	31	3	1	4.292		0	1	0
10.1016/j.knosys.2016.04.023	Dynamic optimization of fuzzy cognitive maps for time series forecasting	KNOWLEDGE-BASED SYSTEMS	31	3	1	5.101		0	0	0
10.1016/j.neucom.2010.11.024	Error back-propagation algorithm for classification of imbalanced data	NEUROCOMPUTING	31	3	1	4.072		0	1	0
10.1016/j.artmed.2008.03.006	Evaluation of an architecture for intelligent query and exploration of time-oriented clinical data	ARTIFICIAL INTELLIGENCE IN MEDICINE	31	3	1	3.574		0	0	0
10.1016/j.imavis.2007.08.001	Fast VQ codebook search algorithm for grayscale image coding	IMAGE AND VISION COMPUTING	31	3	1	2.733		0	1	0
10.1016/j.asoc.2014.06.049	Glowworm swarm optimization algorithm with topsis for solving multiple objective environmental economic dispatch problem	APPLIED SOFT COMPUTING	31	3	1	4.873		0	1	0
10.1016/j.patcog.2008.09.017	Improved bi-dimensional EMD and Hilbert spectrum for the analysis of textures	PATTERN RECOGNITION	31	3	2	5.898		0	2	0
10.1007/s11263-010-0376-0	Measuring and Predicting Object Importance	INTERNATIONAL JOURNAL OF COMPUTER VISION	31	3	15	6.071		0	15	0
10.1007/s12652-010-0011-5	Ontology-based multi-agents for intelligent healthcare applications	JOURNAL OF AMBIENT INTELLIGENCE AND HUMANIZED COMPUTING	31	3	1	1.91		0	0	0
10.1007/s10032-009-0090-z	Opinion mining from noisy text data	INTERNATIONAL JOURNAL ON DOCUMENT ANALYSIS AND RECOGNITION	31	3	1	0.846		0	1	0
10.1016/j.asoc.2007.10.022	Performance evaluation of a two stage adaptive genetic algorithm (TSAGA) in structural topology optimization	APPLIED SOFT COMPUTING	31	3	1	4.873		0	1	0
10.1016/j.dss.2010.08.032	Resource allocation for demand surge mitigation during disaster response	DECISION SUPPORT SYSTEMS	31	3	1	3.847		0	1	0
10.1016/j.media.2012.05.014	Semiautomatic carotid lumen segmentation for quantification of lumen geometry in multispectral MRI	MEDICAL IMAGE ANALYSIS	31	3	4	8.88		0	4	0
10.1007/s10514-016-9574-0	RBDL: an efficient rigid-body dynamics library using recursive algorithms	AUTONOMOUS ROBOTS	31	2.6	4	3.634		3	0	0
10.1016/j.eswa.2012.02.036	Ensemble based sensing anomaly detection in wireless sensor networks	EXPERT SYSTEMS WITH APPLICATIONS	31	2	3	4.292		3	0	0
10.1016/j.cviu.2012.11.016	Hierarchical segmentation and identification of thoracic vertebra using learning-based edge detection and coarse-to-fine deformable model	COMPUTER VISION AND IMAGE UNDERSTANDING	31	2	3	2.645		3	0	0
10.1007/s10514-015-9517-1	Three-dimensional coverage path planning via viewpoint resampling and tour optimization for aerial robots	AUTONOMOUS ROBOTS	31	2	3	3.634		3	0	0
10.1016/j.artmed.2012.03.005	Acute leukemia classification by ensemble particle swarm model selection	ARTIFICIAL INTELLIGENCE IN MEDICINE	31	1.5	2	3.574		2	0	0
10.1016/j.artmed.2013.11.006	Performance of a dermoscopy-based computer vision system for the diagnosis of pigmented skin lesions compared with visual evaluation by experienced dermatologists	ARTIFICIAL INTELLIGENCE IN MEDICINE	31	1.5	2	3.574		2	0	0
[truncated: 5,870 more rows]
